# Supplementary material for: Global Wild Annual Lens Collection: A Potential Resource for Lentil Genetic Base Broadening and Yield Enhancement
Source: PLoS One. 2014 Sep 25;9(9):e107781. doi: 10.1371/journal.pone.0107781 (PMC4177869; doi:10.1371/journal.pone.0107781)
Supplement: Table S3 — Dissimilarity matrices of Lens accessions based on quantitative agro-morphological data. (XLSX) [file pone.0107781.s003.xlsx]

## Sheet: Sheet1
Table S3:	Dissimilarity matrices of Lens accessions based on quantitative agro-morphological data.
Genotypes	L830	ILL10829	ILL8006	PRECOZ	ILWL3	ILWL4	ILWL6	ILWL7	ILWL8	ILWL55	ILWL62	ILWL69	ILWL70	ILWL71	ILWL72	ILWL73	ILWL74	ILWL75	ILWL76	ILWL77	ILWL78	ILWL79	ILWL80	ILWL81	ILWL82	ILWL84	ILWL85	ILWL86	ILWL87	ILWL88	ILWL89	ILWL92	ILWL93	ILWL94	ILWL95	ILWL96	ILWL97	ILWL98	ILWL101	ILWL102	ILWL103	ILWL104	ILWL105	ILWL106	ILWL109	ILWL113	ILWL115	ILWL117	ILWL122
ILL10829	323.939
ILL8006	151.976	173.415
PRECOZ	345.071	22.6386	194.467
ILWL3	338.149	122.829	209.517	129.273
ILWL4	356.494	120.569	224.724	123.501	25.1885
ILWL6	369.898	125.411	237.385	126.152	37.032	14.234
ILWL7	339.496	24.2815	190.471	22.026	110.144	104.465	107.711
ILWL8	276.044	126.849	155.858	143.062	104.339	119.717	127.876	127.768
ILWL55	264.921	100.178	132.805	117.546	89.7892	103.466	114.347	101.914	52.1971
ILWL62	320.71	66.624	179.432	76.2197	63.8192	65.6666	72.3207	57.3314	82.212	60.6789
ILWL69	301.252	134.901	181.109	147.765	45.8694	68.2371	79.9852	129.166	77.4313	70.9468	76.3537
ILWL70	324.005	126.996	199.248	135.171	25.3633	39.6243	51.3232	115.306	96.6809	77.3761	65.7021	42.5661
ILWL71	314.466	128.779	191.706	138.486	33.4491	49.2559	61.2048	118.502	90.5409	71.1028	67.81	37.1596	11.0232
ILWL72	270.293	125.636	148.869	140.47	73.4775	90.2527	103.036	122.844	78.4167	42.795	77.101	52.9611	54.99	46.4073
ILWL73	246.578	152.784	139.429	169.133	101.039	119.507	132.148	152.282	85.8869	60.0913	107.484	71.165	81.6936	71.8933	32.6707
ILWL74	261.562	104.323	130.617	120.945	86.7677	101.025	113.326	104.957	74.6154	26.8143	68.4624	71.0054	72.5726	65.8675	29.8544	49.497
ILWL75	386.461	127.454	251.496	125.035	55.1798	32.0785	19.154	107.913	142.072	129.151	81.2025	98.1888	69.9006	79.7164	120.529	150.265	128.655
ILWL76	279.048	106.382	149.059	120.897	67.1449	81.1792	93.6647	103.763	78.0675	35.7652	59.2291	55.1982	52.5323	47.0123	21.9135	52.639	26.2879	109.889
ILWL77	303.615	85.2382	167.066	96.9343	52.9956	60.9058	72.2116	78.2351	84.481	48.7111	33.1943	59.8138	46.3309	45.9897	48.6504	80.8962	45.3852	85.9726	30.4145
ILWL78	383.627	126.759	248.887	124.795	49.6802	30.0499	18.4951	107.68	138.473	126.591	79.3837	93.6022	66.8149	76.8399	117.735	147.262	125.814	12.3034	107.52	83.9485
ILWL79	360.052	122.477	228.295	125.09	27.4207	6.45039	10.7332	106.177	119.584	105.863	66.8384	69.5518	42.7596	52.2911	93.9419	122.916	104.83	29.1157	84.8712	64.5033	27.143
ILWL80	382.406	125.075	247.594	123.201	51.3211	28.586	15.4877	105.783	137.291	124.473	77.0381	94.2447	65.6863	75.5467	116.171	145.935	124.317	5.39189	105.5	81.7556	11.2909	25.3954
ILWL81	294.104	124.903	170.184	137.924	47.0909	65.6545	79.2529	119.728	89.0118	63.87	71.1467	28.9052	37.4275	31.881	37.4884	62.0753	56.5891	97.3301	36.1663	44.8001	94.3155	69.0548	93.5317
ILWL82	277.615	130.616	158.342	144.489	68.4118	85.2962	97.7465	126.317	79.6161	48.7284	78.1554	48.8665	48.2293	39.3148	10.2485	35.2424	38.7636	115.638	26.5468	50.1102	112.902	88.7655	111.242	35.0072
ILWL84	261.559	112.784	134.143	129.079	83.3076	98.5884	111.196	112.627	74.5822	29.7434	72.1353	64.491	67.4705	59.9645	19.3403	40.2665	11.6322	127.447	20.8378	46.378	124.753	102.338	123.075	49.1896	28.7963
ILWL85	244.069	120.265	117.968	138.029	100.431	116.766	129.289	123.362	74.3546	32.3093	85.5594	76.4766	85.0891	77.2716	33.1293	38.1103	22.0185	145.594	37.098	63.0917	142.647	120.279	141.116	63.6153	42.2722	19.3803
ILWL86	317.728	114.353	188.731	124.373	22.3482	43.7032	56.2522	105.444	87.1978	71.5592	55.5183	29.8669	28.4654	29.8995	58.0852	85.6141	69.5524	73.67	51.3731	41.2535	68.6248	45.9842	69.6268	31.7388	54.818	66.1315	82.0778
ILWL87	363.757	106.665	226.793	107.197	39.8156	29.9984	28.4212	89.9381	117.432	105.328	56.3442	79.3425	58.065	67.1503	102.065	132.56	106.803	34.1613	89.4697	64.6676	27.1798	28.1481	30.2001	80.3424	98.5311	106.661	123.307	52.3997
ILWL88	317.256	91.1131	181.049	100.869	36.0218	46.9436	58.4715	82.5008	89.5234	65.0952	36.0303	50.6692	41.6533	44.5561	61.5521	92.7896	63.5424	72.6652	46.6049	24.9155	68.565	49.8908	68.5851	42.6874	61.1551	63.2747	79.1809	24.9721	47.3171
ILWL89	272.234	105.287	140.583	122.033	69.7285	87.8173	101.01	106.041	75.4606	44.3193	64.5947	47.7482	64.4076	58.8831	39.6019	61.5854	37.7173	117.023	32.539	43.2824	112.939	91.1346	113.042	36.7812	45.4065	35.9354	44.7735	48.6555	92.768	46.4479
ILWL92	246.671	155.153	140.753	171.412	102.124	121.054	133.524	154.649	85.0323	61.313	109.093	71.6638	82.8796	73.2111	34.9912	5.41492	52.0599	151.75	54.7463	83.0747	148.509	124.314	147.337	63.903	36.8761	42.9004	39.8917	86.8079	133.591	94.4071	63.5699
ILWL93	379.532	94.571	237.729	89.5019	69.6536	54.3799	48.8107	74.0781	131.982	119.399	61.3797	107.02	84.3672	92.6291	123.538	155.089	122.24	41.7108	108.663	79.6761	40.3475	52.8006	40.3245	106.16	121.284	124.499	140.919	79.532	32.7509	68.1394	112.918	156.573
ILWL94	292.67	101.988	160.508	116.188	51.4057	69.792	82.0498	99.0688	70.9303	48.351	50.1483	36.3955	49.7366	46.6276	45.6651	72.4282	48.8829	98.1026	34.9539	33.832	93.5527	72.2295	93.8332	32.0079	47.1652	46.7779	59.0402	30.1507	72.2831	28.7841	23.2186	73.6038	94.4003
ILWL95	310.762	92.2478	175.14	103.761	42.3361	55.1688	66.0564	86.0169	78.5458	57.7319	34.7913	45.7987	45.8361	46.8252	59.0123	88.8965	60.9157	80.5878	43.9085	27.3009	76.7859	57.0184	76.2835	41.3081	58.8615	60.0634	74.2305	26.7423	54.2546	13.966	41.7302	90.1898	74.988	21.1932
ILWL96	209.438	151.884	94.8843	172.364	131.091	150.647	164.128	159.954	97.0643	76.9491	124.933	94.5146	121.007	112.425	74.3918	63.0516	72.0875	181.129	81.1111	104.667	177.555	153.829	177.175	87.7746	81.7537	68.7807	56.4899	110.209	158.205	112.34	66.4342	64.1467	178.515	86.2627	105.572
ILWL97	264.626	144.242	151.487	159.496	80.0761	99.4526	112.314	142.084	83.5341	57.7497	94.03	50.5188	62.3616	53.098	21.5764	23.8628	47.9308	130.806	39.9422	66.3903	127.554	102.754	126.552	39.834	20.7605	36.9847	42.7704	64.9127	113.098	74.1778	47.7795	24.7897	137.825	54.6179	70.4739	68.1965
ILWL98	304.109	93.7346	169.113	106.215	44.3089	57.8233	69.9211	88.5127	80.991	54.8349	39.9324	44.1236	44.6606	44.3098	52.1149	82.331	54.5918	85.0462	36.8122	23.2883	81.6988	60.5597	80.9383	34.1054	52.7216	53.1886	67.892	27.0657	60.8831	15.5698	34.4385	84.0268	81.5198	17.3812	10.4918	98.6855	63.8597
ILWL101	319.085	95.9277	184.829	105.91	35.3598	47.5633	57.6464	87.109	77.8492	62.9716	34.3858	44.9918	40.7174	42.6352	63.5099	93.0334	66.8138	72.2639	51.2572	32.2478	68.0615	48.7786	67.8329	46.0727	61.9102	66.1379	81.4111	22.943	46.3579	17.7326	50.6874	94.2619	67.5124	29.5141	14.6719	114.21	74.9866	21.6366
ILWL102	265.147	105.33	132.906	122.904	77.1562	94.3721	107.643	107.612	77.7073	43.3241	68.7339	54.5637	70.6507	64.723	40.0975	59.8759	35.3058	123.476	33.4399	46.9276	119.851	97.8538	119.559	41.6004	47.1857	33.8148	40.4416	56.3884	99.8276	52.9779	9.07625	62.2094	118.927	30.9071	48.2302	60.3618	48.3023	40.3754	57.5839
ILWL103	358.004	82.6674	216.541	82.3922	56.2463	46.6252	46.9458	64.9213	114.92	99.2736	41.9541	89.4437	69.9914	77.1966	104.09	135.818	101.848	48.364	88.4474	59.3316	45.4039	46.4417	45.4117	87.1911	102.649	104.17	120.194	61.5807	25.9348	47.261	91.2983	137.376	22.1665	73.2417	53.9736	156.741	118.605	60.3107	47.643	97.1496
ILWL104	291.519	101.385	160.771	114.26	56.6019	70.5287	82.4497	95.7259	74.578	38.979	49.1962	52.0244	43.177	38.6804	30.6699	61.7472	31.9428	98.2774	20.4703	23.0318	94.9736	74.1016	93.762	39.5878	32.058	31.0069	48.6646	42.1862	76.8498	37.6829	37.4767	63.5428	95.1961	32.1221	37.4383	93.5852	49.18	32.8341	39.7136	41.3688	75.551
ILWL105	286.28	126.579	164.845	139.711	57.3929	75.6512	88.1697	121.098	77.6605	50.2527	71.3937	39.8909	38.7318	30.0704	18.1964	44.8008	41.8593	106.22	26.9939	44.4006	102.755	78.9969	101.78	28.556	12.348	33.7817	48.9415	43.5542	88.0014	51.726	41.66	46.0023	111.756	38.9888	50.0342	86.8025	27.448	44.7046	51.9171	45.6309	93.2169	26.2906
ILWL106	265.936	125.15	144.299	140.623	76.2714	93.8071	106.669	123.29	75.2558	40.13	77.9713	53.1612	58.9502	50.2278	6.32826	30.6545	27.306	124.138	23.7525	50.6007	121.031	97.4053	119.761	39.5687	15.0812	16.8624	28.9752	59.6399	104.568	63.0233	36.752	32.9311	125.86	44.8167	59.7932	69.3486	21.397	52.9608	64.5151	36.8049	106.019	32.1015	21.3431
ILWL109	337.057	88.3106	198.895	94.3598	39.9193	41.7666	48.1223	76.1874	93.4693	78.8084	30.8726	64.1525	52.028	57.5982	82.1866	113.05	83.0365	58.6202	67.1451	41.7618	54.5822	41.9527	54.3864	63.5007	80.5533	83.6185	98.9574	38.3102	29.7517	25.1178	68.3118	114.279	47.7057	47.9174	28	133.029	94.7443	36.0576	22.0711	74.7898	27.7724	55.9329	70.8188	83.7561
ILWL113	370.321	91.8433	229.137	88.521	60.144	44.8201	41.6287	72.1217	128.599	111.506	55.1892	98.657	74.043	82.5227	112.782	144.725	112.332	38.1576	97.6983	68.8686	36.5736	44.5515	36.1	95.0347	110.594	114.17	130.971	70.0988	26.3374	57.6316	103.014	146.347	14.7171	85.128	65.8452	168.786	127.098	71.2974	59.3932	108.776	15.9335	85.01	101.335	115.348	40.0393
ILWL115	341.522	79.4928	201.609	83.1143	50.1006	44.1804	48.7515	63.5399	101.549	81.1551	26.8683	78.4473	56.9244	62.7632	85.9223	117.838	83.5203	55.8567	69.9754	40.6918	54.1918	45.4198	51.9014	73.1036	84.7049	85.6107	101.98	51.5215	34.2185	34.9251	77.1748	119.553	39.6004	60.0581	41.2421	141.724	101.767	46.3977	35.599	82.4943	20.8288	57.3404	76.2708	88.1149	21.5827	30.6839
ILWL117	210.862	163.311	109.18	181.628	136.421	154.631	167.252	167.643	97.2092	72.3856	129.933	105.253	118.261	108.964	64.5651	39.7295	65.0662	184.717	78.1909	106.776	181.622	158.074	180.217	96.1768	70.3642	60.7687	45.6029	119.004	164.175	121.493	83.6176	39.1923	184.008	98.9777	116.296	55.2427	60.3733	109.962	122.42	79.1395	163.794	89.3611	79.8565	61.0634	141.554	174.032	145.411
ILWL122	373.508	100.261	233.786	97.2575	56.6419	42.9435	38.2123	80.9727	126.932	113.452	59.0576	96.1579	72.0991	81.0166	113.704	144.937	114.928	35.2816	99.8996	72.4521	30.5432	41.6593	32.6202	95.4456	110.823	116.298	132.988	68.3003	19.242	58.9949	104.67	146.175	16.0804	85.3757	66.6774	170.65	126.905	73.1006	58.8789	111.148	20.1868	86.2107	100.843	116.202	40.0171	12.788	35.087	175.072
ILWL124	265.856	119.267	142.319	134.487	81.5678	96.6228	109.08	117.114	77.9604	37.5244	76.0572	64.572	63.4309	55.2888	16.6653	36.8444	19.2838	125.536	26.4811	49.3563	122.843	100.533	121.208	50.2476	24.113	13.349	28.065	66.2701	106.684	66.1064	43.7861	39.7672	124.794	52.1303	64.4936	76.1186	35.2888	57.8584	68.1109	42.9761	105.414	30.5913	29.8309	15.8812	85.9633	114.456	86.6649	61.9929	116.104
ILWL125	313.91	83.3561	176.997	92.9759	50.0996	57.3506	66.7322	73.8017	81.0683	53.5327	24.7914	62.6693	46.8164	48.3559	58.4595	89.7454	54.5071	79.4774	42.9406	18.2902	76.1307	60.0157	74.8988	54.9115	58.5643	56.7128	72.5675	41.1918	54.9063	25.1426	53.0668	91.2381	68.7929	38.4994	27.9012	115.546	75.6246	30.0141	26.5456	58.146	48.9566	28.497	50.8475	59.9692	32.8397	59.5368	30.8458	115.612	61.256
ILWL143	369.123	58.4711	221.029	47.708	99.3943	87.6424	86.5741	38.4476	140.529	119.24	61.824	128.953	109.649	115.994	132.769	164.72	122.477	81.7714	113.526	84.3788	82.3123	88.0777	80.4989	121.521	133.631	127.539	141.103	101.756	68.8178	80.8677	117.678	166.677	46.1989	104.5	86.2601	178.715	150.208	90.955	85.0233	121.229	45.854	104.081	126.491	134.414	66.5444	46.8007	54.1563	186.334	55.8976
ILWL145	344.75	90.8054	206.873	93.5618	40.6285	33.7605	39.343	74.4751	108.278	86.0357	38.9682	75.3799	48.2805	55.836	83.5488	115.504	84.8823	48.4556	69.2228	41.88	45.6042	36.2033	44.3043	68.7395	81.3089	85.831	103.153	46.7833	28.113	33.4723	77.8771	117.117	41.4947	60.5695	43.0657	143.234	98.3006	47.0167	37.2067	83.6978	25.5865	56.2921	72.2969	86.3556	25.2933	29.681	15.3723	145.267	31.9493
ILWL146	327.075	30.6154	179.21	38.776	93.7464	91.0607	96.0832	20.6393	110.956	83.5885	38.8558	109.874	97.9962	100.667	103.83	133.552	87.0708	99.4716	84.3634	59.0933	98.4573	92.9906	96.6452	100.329	107.266	94.0945	105.126	87.0659	77.946	63.6879	86.4613	135.76	69.2215	78.9235	66.2707	141.959	122.54	68.6475	68.548	88.3225	54.7968	76.855	101.912	104.199	59.7083	64.7636	49.335	150.067	72.7763
ILWL147	343.12	28.7345	194.216	24.9114	107.207	101.979	104.812	10.0264	126.72	103.335	56.209	127.21	113.997	117.586	123.841	153.519	106.683	104.694	105.018	78.7626	103.589	103.44	102.555	119.398	127.012	114.249	125.22	102.985	85.2666	80.4916	105.783	155.684	69.0046	97.5758	84.1895	161.289	142.613	87.4877	84.5772	108.011	60.2673	95.786	120.983	124.159	72.6668	67.9398	61.1772	169.728	75.901
ILWL148	366.813	52.6121	218.486	40.5871	104.477	93.7904	93.3693	30.9797	140.94	119.685	64.1926	132.648	114.144	119.819	134.804	166.23	122.354	88.8831	116.122	87.037	88.9121	94.544	87.653	125.541	136.253	128.403	141.686	105.697	75.4173	84.7773	119.095	168.341	51.8146	107.336	90.4452	179.243	152.947	94.7628	88.6843	122.434	51.015	105.665	129.178	136.09	71.8429	53.2359	58.4618	186.713	61.9738
ILWL150	362.273	48.0057	213.655	37.5437	104.051	93.6117	93.7071	27.698	137.641	115.739	60.5261	130.477	113.014	118.403	131.97	163.37	119.4	90.0698	112.593	83.9195	90.7437	94.3217	88.6512	122.662	133.59	125.222	138.087	104.242	76.1538	82.6003	115.96	165.515	54.4557	104.432	87.2824	175.078	150.043	91.4487	86.5467	118.918	51.5454	103.511	126.988	133.268	69.9642	54.8315	57.1178	183.289	64.2371
ILWL152	344.205	41.4217	196.862	40.5826	91.1651	84.6856	87.2376	22.367	118.054	95.0997	41.228	113.394	97.9985	102.282	112.722	143.625	99.3094	87.8097	93.5663	65.5021	87.2468	85.8459	85.348	105.768	114.731	105.355	117.933	88.3765	68.5446	66.103	96.8981	145.67	54.1981	85.7792	69.8629	155.842	131.007	73.9038	69.583	99.8873	43.6978	84.1177	108.275	113.682	55.8936	51.8324	43.3811	163.056	60.1982
ILWL157A	331.737	26.9358	183.305	31.1301	104.132	100.488	104.33	16.6704	115.736	89.9183	46.7853	120.706	107.734	110.585	112.895	142.042	95.0931	106.439	93.3789	69.1485	105.762	102.047	103.613	111.588	116.279	102.513	112.511	98.1582	85.5917	74.8924	97.4028	144.051	73.6801	89.6172	76.7741	150.976	132.003	79.7917	78.7046	99.0517	62.015	86.0065	111.357	113.29	68.9274	70.8808	57.5602	156.788	78.571
ILWL157B	218.149	110.207	73.0368	131.516	140.245	153.912	166.004	123.653	98.3726	64.5798	106.722	117.762	131.201	124.858	86.3876	89.8362	63.731	179.54	80.9789	95.2061	177.068	157.29	175.545	105.516	96.1126	69.0835	56.8407	120.1	154.693	109.756	74.0125	91.8193	165.316	91.712	104.038	61.018	95.0872	98.5117	113.746	66.7963	144.175	91.4112	100.52	82.2008	126.745	156.77	128.872	76.2468	161.334
ILWL171	217.655	130.087	92.2207	149.694	128.241	144.366	156.883	137.097	83.6738	50.4832	107.077	101.375	113.578	105.222	61.319	54.52	45.0469	172.623	66.0919	88.7177	169.753	147.861	168.253	90.9359	70.3355	47.1171	30.4889	108.884	149.797	105.19	66.8181	56.1827	164.784	84.2031	99.8863	50.6928	67.457	93.8249	106.803	60.8937	143.993	75.6381	77.286	56.7116	124.103	155.654	126.189	38.5196	158.284
ILWL176	367.845	45.6671	217.668	27.4759	122.929	113.163	112.993	30.7206	150.213	128.402	76.784	148.188	131.828	136.997	147.497	178.208	132.324	108.448	127.797	100.387	108.783	113.895	107.241	140.146	149.834	139.119	150.512	122.353	94.3004	100.022	130.282	180.302	71.3103	120.206	104.223	186.727	165.972	108.261	104.283	132.681	70.0894	119.268	143.632	148.434	88.1837	72.9535	76.1398	195.325	81.5085
ILWL177	271.311	89.9702	135.207	106.402	82.0065	94.1029	105.864	90.5801	75.2334	25.6185	55.155	71.7935	70.5918	65.7365	38.498	63.1979	15.9751	120.092	24.5315	34.5326	117.577	97.7436	115.787	56.5558	45.949	23.0697	33.7062	65.2564	97.2695	54.155	36.4579	65.552	110.729	43.59	51.4701	80.5487	57.5851	45.8069	58.5996	34.8334	90.0704	28.8875	46.5511	37.2605	72.2366	100.923	71.8893	78.7714	104.356
ILWL178	369.831	56.1809	221.764	44.5865	104.062	92.6632	91.4738	34.8628	139.66	120.447	63.5848	132.427	113.935	119.769	136.091	167.583	124.446	86.4202	117.413	88.1327	86.8818	92.9348	85.1779	126.273	137.169	130.149	143.539	105.757	73.6423	85.4215	120.88	169.602	48.6921	108.105	90.4636	181.341	154.016	95.36	88.1947	124.427	49.4392	106.875	129.986	137.473	70.6738	51.5265	57.5462	188.573	59.9474
ILWL180	282.581	111.295	155.241	125.449	67.0368	83.7146	94.7463	108.044	57.8472	29.4282	57.7107	50.4671	53.2626	47.4367	30.115	54.29	34.2399	111.215	25.9501	39.721	107.424	86.0591	106.297	45.5111	30.968	30.8474	41.8382	50.6516	87.5731	50.3223	39.9738	54.49	107.595	34.4613	44.1867	86.0236	43.5052	42.1385	47.4248	43.6238	88.1163	23.0186	27.5999	29.5865	65.1831	98.8268	70.6305	79.1496	98.41
ILWL181	287.507	122.662	164.35	135.447	59.8437	75.2693	87.3829	117.102	79.6494	47.6477	67.9933	47.4778	39.7235	32.4434	18.2907	47.4743	40.1177	104.94	21.4342	40.1461	102.415	78.6781	100.43	32.1195	12.8366	31.9542	47.7482	47.4949	87.5819	51.5241	45.1475	48.8606	109.96	41.8798	49.7535	90.1068	31.8234	44.2938	52.6681	48.0027	91.5511	24.4577	11.9445	23.2179	69.8585	99.1536	73.3945	80.5909	99.5168
ILWL182	314.136	98.1755	181.247	107.319	40.9059	48.5371	59.8686	87.7995	89.084	58.7529	40.7704	55.5966	31.0194	32.6515	49.5784	81.6764	54.3469	74.9891	36.736	17.7921	72.7335	52.3575	70.5636	42.6356	47.6361	53.221	71.3912	34.6953	56.5677	26.207	52.7733	83.5391	74.9889	39.7276	31.756	114.07	65.6704	29.6814	30.672	57.674	56.7559	24.6615	40.0849	52.8227	40.0174	63.7982	38.387	111.944	65.6003
ILWL183	333.866	79.6815	194.54	84.4503	48.265	46.1388	53.054	64.9812	101.008	75.3721	28.2404	75.475	52.1825	57.5875	77.3795	109.545	74.4787	62.1379	61.4303	32.4382	59.462	48.8745	58.0861	67.112	76.6415	76.8123	93.4384	48.1184	39.8163	29.6449	70.1355	111.298	48.8915	54.7147	38.3333	134.812	93.9409	41.6202	34.7354	75.3059	30.1113	48.4056	68.4047	79.6519	26.3354	38.2167	13.4722	136.74	42.0223
ILWL192	308.514	89.9605	173.667	100.363	49.0464	59.6171	69.889	81.3948	78.0611	49.6184	32.9551	57.5341	43.0567	43.2512	50.9942	81.8859	48.6766	83.9159	37.3597	18.6522	80.0146	62.5712	79.2689	49.7785	51.0115	50.2498	66.4028	38.3373	59.5553	26.5396	48.0801	83.2632	75.8932	34.4608	28.738	109.835	67.9391	29.2917	27.7164	53.451	56.2909	20.8745	42.9487	52.3861	38.583	66.4669	38.8282	108.487	67.2809
ILWL201	247.018	134.266	127.258	152.573	92.5597	112.492	126.025	137.25	80.5403	56.7722	95.1879	57.0297	82.8722	74.533	43.4174	45.2959	49.8388	143.44	50.1191	72.2103	139.777	115.649	139.512	49.4823	49.3406	43.6084	42.1887	72.1211	121.801	77.1659	33.7539	47.1306	144.162	51.4429	71.1786	38.9361	37.9789	63.8936	78.7801	30.3188	122.939	60.7571	51.5905	38.9369	98.5082	134.122	108.085	63.1791	135.281
ILWL219	277.629	128.593	157.432	142.612	68.0038	85.8785	98.0054	124.673	72.7898	44.2291	75.1851	46.8188	49.0977	40.604	13.2533	36.7874	37.7135	115.879	26.2188	49.3608	112.601	88.9658	111.28	36.7264	8.91397	28.4283	40.6021	53.3728	96.7811	59.4974	43.4879	37.4627	119.707	43.5588	55.9265	81.0084	22.6897	50.8271	58.9466	45.9318	100.841	30.1302	12.1311	15.511	77.9384	109.52	83.1562	70.028	109.181
ILWL220	261.543	117.121	136.661	133.176	85.4874	101.685	113.709	116.561	66.4175	26.6008	74.0626	64.967	68.9538	61.0969	22.3573	38.07	17.1833	130.127	28.2467	51.584	126.917	104.99	125.518	54.6907	29.5462	13.13	20.6669	68.4879	108.474	67.4614	42.1167	39.579	126.5	49.8322	63.3415	71.6606	37.7994	58.0974	67.6677	41.384	106.636	32.7694	34.0268	19.0264	85.7971	116.99	88.1592	57.9154	118.058
ILWL225	248.131	126.446	126.526	143.605	96.4248	113.659	126.015	127.876	69.027	32.9138	86.3847	70.6105	79.8035	71.2769	27.6579	29.8753	25.0715	142.864	37.3403	63.8145	139.679	116.943	138.291	60.6637	35.4318	19.6328	12.3736	78.5136	121.16	78.7811	46.3598	31.1799	140.018	58.0052	73.6756	60.0164	35.7563	67.8955	79.1357	43.7596	119.771	46.1238	42.363	23.0544	97.8975	130.366	101.486	44.2454	131.482
ILWL227	315.337	122.505	189.268	132.949	25.055	45.9175	58.7099	113.964	89.0108	73.2799	63.0627	24.3484	24.9105	24.5779	54.8935	80.9038	70.7244	77.0028	50.6902	45.5205	73.0352	48.2007	73.0946	24.9362	50.4244	65.5377	81.3554	11.9241	59.6411	33.3372	50.3251	82.1463	87.4066	34.1993	33.5273	107.864	59.2343	31.8304	31.2728	57.2956	70.2022	44.5953	40.0783	56.9862	46.9334	77.5765	59.2036	115.956	76.0776
ILWL228	262.776	144.871	148.429	160.956	81.429	102.028	115.776	144.584	95.8916	72.0534	100.313	48.5959	71.6047	63.8014	43.0971	47.2142	60.5601	133.835	52.7847	73.3772	129.985	105.564	130.226	38.112	45.1672	52.1829	56.8947	64.4741	115.477	74.5911	41.6382	48.9668	141.003	53.4797	71.4608	58.6854	31.7787	63.5542	77.7621	41.4773	120.945	61.8715	45.8801	41.237	96.953	129.932	107.105	75.2456	130.348
ILWL230	177.73	230.386	130.523	250.631	188.399	210.097	223.362	237.408	153.226	147.069	197.621	146.643	176.508	166.985	133.762	107.74	141.51	241.81	148.166	174.838	237.828	212.956	238.024	145.778	137.484	135.563	123.618	170.38	222.123	180.102	136.872	106.943	246.877	153.505	173.686	78.8091	118.084	167.136	180.223	132.832	226.081	159.76	143.655	129.819	200.767	237.027	211.368	93.7468	237.044
ILWL231	235.598	167.246	134.508	185.178	112.348	133.145	146.775	169.73	106.038	86.9142	127.05	74.8602	100.852	91.9691	62.7534	48.4488	76.6386	165.024	76.2094	100.983	161.336	136.494	161.372	68.5762	66.0543	68.6253	64.8925	95.0146	146.65	104.85	65.4509	49.4524	171.774	81.0182	100.347	42.8927	47.13	92.7605	106.907	62.7051	151.397	87.4295	70.5125	59.6507	126.889	161.047	136.825	63.0015	161.486
ILWL241	329.981	114.634	199.657	122.333	14.4304	29.2538	41.9844	103.484	98.5747	80.6215	55.3582	42.8102	24.8885	31.4545	66.384	95.427	78.5827	59.7227	57.391	42.7566	56.0614	31.8198	55.6914	39.1349	62.0991	74.9888	91.9057	17.7289	42.4725	26.7728	61.1493	96.7558	70.4593	42.5713	31.6997	122.918	74.2122	32.8307	27.5607	67.9415	54.3799	49.2694	51.9711	69.2221	34.1368	59.9339	45.0195	129.592	58.7306
ILWL242	307.03	99.1813	174.486	109.899	40.72	52.408	64.8108	90.851	85.7143	54.5454	42.9584	48.5103	31.7841	31.4709	43.5789	75.861	49.2174	80.6835	30.2488	15.4802	77.8618	56.2595	76.3568	33.9935	42.4974	47.3634	65.2613	29.4908	60.5508	22.0899	42.8982	77.7683	80.7921	30.4599	26.1556	105	58.7575	21.676	28.2537	48.1019	61.3128	20.323	34.4393	46.2938	41.4385	69.555	43.9879	106.122	71.2101
ILWL243	222.204	171.944	124.238	190.679	124.778	145.25	158.907	176.042	110.061	90.9494	135.038	86.864	112.834	103.814	70.8709	53.2232	81.5539	177.046	83.7323	109.59	173.554	148.603	173.327	80.0799	75.1288	74.211	67.14	106.787	158.065	115.014	73.3394	54.0682	182.383	90.3935	109.888	35.4485	56.3768	102.261	117.123	69.3798	161.609	96.2212	80.7494	67.3922	137.034	171.681	146.577	58.5476	172.522
ILWL244	295.477	100.258	163.642	112.582	52.6215	65.63	77.6923	94.3277	79.3916	43.2463	46.8131	51.1205	40.1263	37.1522	33.3033	65.6508	37.3666	93.5798	17.8547	17.4784	90.7373	69.2587	89.0824	35.2349	33.8871	35.1176	52.4328	38.997	72.4591	32.1601	37.619	67.395	91.8371	29.7988	32.03	95.7598	50.5258	26.7626	36.8499	41.6511	72.0215	11.2862	28.1427	35.7399	51.4807	80.959	53.7742	93.712	82.5835
ILWL246	117.193	353.536	201.614	374.644	326.588	347.639	361.13	364.209	282.25	275.612	330.991	286.053	312.869	303.204	265.821	237.034	269.397	379.566	279.918	307.956	375.928	350.904	375.777	282.637	270.246	265.031	250.148	308.769	360.078	316.333	271.569	236.203	383.685	290.156	310.238	207.769	251.962	303.229	317.671	266.272	362.429	292.859	278.206	262.163	337.839	373.374	346.68	211.222	374.17
ILWL247	181.909	215.451	120.906	235.808	176.253	197.653	210.988	222.633	140.42	132.963	183.283	134.521	164.56	155.055	121.048	96.3835	127.853	229.281	134.572	160.931	225.458	200.519	225.469	133.013	125.225	122.066	110.056	157.656	209.189	166.492	122.787	95.8499	233.331	139.79	159.861	63.7961	106.187	153.263	166.72	118.511	212.363	146.483	131.355	116.954	187.11	223.531	197.555	82.9062	223.866
ILWL248	306.782	133.641	185.37	145.228	37.0343	58.4481	71.3309	126.573	92.2725	76.2747	76.3904	19.2163	32.3471	28.3916	51.0687	72.6996	71.0777	89.8675	52.0966	54.949	85.8367	61.0493	86.2394	19.2616	46.3001	64.2359	78.6261	25.2364	74.2197	45.8612	49.3942	73.8918	102.514	39.0805	45.3145	99.8377	50.2993	41.3283	45.2106	55.5728	85.2968	49.5268	37.3171	52.8361	62.1045	92.3238	74.1082	108.827	90.8127
ILWL249	194.496	193.987	113.961	213.569	154.609	175.411	189.042	200.063	128.007	111.55	161.475	116.164	141.633	132.34	95.7254	71.6576	102.751	207.272	109.389	136.681	203.564	178.815	203.426	110.259	100.488	96.7161	85.2439	136.465	187.484	143.812	100.343	71.6034	211.305	118.441	138.423	45.5199	81.8564	131.05	145.801	95.7031	190.275	122.054	107.31	91.9264	165.827	200.719	174.764	60.0141	201.505
ILWL253	322.511	112.384	192.48	121.343	17.6906	37.2223	50.2984	102.339	93.7636	75.4519	54.6904	37.2439	26.3247	29.9678	61.048	89.6902	71.8679	67.5483	53.3464	39.9948	62.709	40.2657	63.6456	34.8881	57.724	68.8883	85.7095	8.68214	47.6682	23.1958	52.8656	91.1343	74.4933	35.3144	28.8201	115.448	69.125	28.6538	24.2359	60.121	56.9496	43.3806	46.747	63.0919	36.0648	64.2449	47.2299	123.387	62.994
ILWL255	130.031	317.16	180.386	336.509	292.143	311.177	323.681	324.811	241.001	231.474	291.015	256.238	272.714	262.862	223.029	191.991	225.629	341.851	238.832	267.956	338.937	314.56	337.526	250.688	226.662	221.835	206.769	276.046	323.794	282.071	241.534	190.672	344.964	258.188	276.674	186.688	212.796	270.154	282.354	236.492	325.127	250.033	236.546	220.254	302.405	334.936	306.602	161.718	335.51
ILWL256	244.862	152.614	134.663	170.003	99.2127	120.1	133.88	154.619	99.269	75.8345	112.607	64.4548	88.649	80.3628	51.0713	44.6309	63.9939	151.883	62.4898	86.2182	147.839	123.67	148.169	55.6875	55.151	56.39	54.8987	81.3929	132.255	89.6692	50.2484	46.0017	156.991	66.276	85.7734	43.7937	38.2646	77.9715	92.8369	47.8666	136.38	73.2254	58.3008	47.8073	112.309	146.071	122.063	63.7532	146.635
ILWL277	314.211	28.3861	166.359	43.6822	98.0471	98.1764	104.561	28.1857	104.166	75.6324	41.3217	108.554	100.369	101.524	99.201	127.218	79.4527	109.649	80.477	58.4915	108.283	100.377	106.605	98.9988	103.725	87.46	96.9323	88.4163	86.9648	65.8629	80.7342	129.538	80.9201	76.2701	66.9838	132.354	118.04	68.2828	70.1541	81.6914	64.9592	73.8783	99.2034	98.8743	65.5685	76.1906	57.0688	141.159	83.5665
ILWL278	355.371	39.0707	206.645	29.025	109.267	101.774	102.997	19.1421	134.047	113.113	62.0746	132.573	117.616	122.022	132.214	162.485	116.638	100.697	113.66	85.9966	99.914	102.79	98.9955	125.873	134.679	123.786	135.623	107.269	83.6224	85.721	114.746	164.617	63.1385	104.915	90.0865	172.02	150.787	94.0725	89.0212	117.492	58.3016	103.346	128.067	132.807	74.951	64.0695	62.7153	180.286	72.0337
ILWL281	353.04	36.942	204.452	28.4767	109.16	101.285	102.749	15.9124	132.531	111.06	60.4896	131.658	116.726	120.84	130.548	160.749	114.853	100.703	111.923	84.3211	100.6	102.341	99.0088	124.468	133.092	121.94	133.839	106.775	84.6172	85.1818	113.543	163.026	64.3279	104.131	89.261	170.209	149.306	92.9234	88.3165	116.011	58.9422	102.093	126.836	131.203	74.8207	64.8779	61.9494	178.481	73.5083
ILWL286	183.358	145.608	49.9135	166.274	172.063	186.79	199.056	158.651	116.695	89.7261	141.428	145.607	159.03	151.217	107.635	99.219	87.9488	213.516	108.897	128	211.071	190.296	209.305	134.615	116.898	92.0305	75.6243	152.123	189.687	144.878	106.599	100.596	200.854	125.018	139.216	72.8486	113.16	133.499	147.424	99.509	180.136	119.169	123.922	103.301	162.395	192.359	163.329	70.1327	196.349
ILWL290	266.699	76.1369	124.119	94.4485	100.26	110.112	120.804	82.1043	81.2502	34.5756	59.1391	91.5527	91.7431	88.0401	61.2406	81.8115	35.5735	133.035	46.1435	49.5791	130.885	113.384	128.852	77.3021	68.9945	43.9825	45.9069	83.6501	108.671	67.8639	51.8537	83.8706	117.346	59.3256	64.1682	86.2671	78.6822	60.2434	72.6801	48.6549	97.0305	51.0662	70.0224	59.477	82.1135	108.656	80.4304	87.9908	113.318
ILWL293	375.513	61.4973	227.231	47.6703	106.418	94.5323	92.9752	40.3208	148.236	127.399	70.9779	137.188	117.185	123.558	140.718	172.437	129.388	86.852	122.266	92.9291	86.7476	95.1268	85.9931	130.345	141.746	135.157	148.861	109.444	75.1741	89.2158	125.496	174.459	49.6723	112.992	95.6495	186.76	158.557	100.216	93.4339	129.2	52.398	111.388	134.285	142.212	75.4236	52.1359	62.2728	193.821	60.2843
ILWL295	372.227	56.7858	223.762	42.6175	109.123	98.1993	97.225	35.716	146.761	125.932	70.8026	138.352	119.306	125.205	140.698	172.056	128.075	91.7742	122.31	93.2696	91.4772	98.925	90.7707	131.575	142.113	134.334	147.611	111.046	79.031	90.4973	125.017	174.124	54.067	113.279	96.6179	185.352	158.869	101.034	94.5083	128.497	55.4204	111.324	134.832	141.964	77.4458	56.5226	64.1562	192.469	64.5354
ILWL297	373.125	54.5322	224.11	38.8547	115.48	103.602	102.572	34.3181	150.421	128.839	74.3593	143.77	124.785	130.438	144.811	176.126	131.625	96.7492	125.885	97.0862	97.7381	104.279	95.913	136.022	146.435	137.898	150.878	116.957	85.9611	95.8746	129.375	178.363	60.4881	118.29	101.38	188.356	163.28	105.435	99.8985	132.316	61.921	116.085	139.778	146.163	83.0614	62.7796	69.2041	195.797	71.8475
ILWL301	289.899	42.1664	141.478	61.2592	107.44	112.054	120.437	52.1173	98.2899	62.5959	53.1353	109.167	105.482	104.674	90.073	114.471	66.1244	128.447	71.7446	59.7484	126.641	114.812	124.872	96.8805	96.4766	74.9489	79.8046	94.0043	103.811	72.4144	72.6257	116.609	103.787	74.1318	70.942	114.36	108.342	69.9966	77.9651	71.3009	85.6302	70.7114	94.4889	88.9319	79.0151	97.2189	73.9437	122.085	103.662
ILWL302	264.375	69.3692	119.37	89.0458	112.595	121.423	131.474	78.616	83.9483	43.891	65.1696	104.005	105.347	101.647	75.8101	94.1296	48.044	142.478	62.1489	62.2999	140.418	124.443	138.444	92.0064	83.7178	57.7168	57.5637	95.9042	117.822	79.4334	64.08	96.242	122.848	71.6955	75.6762	93.0382	93.1089	72.7823	82.8919	60.7131	103.325	64.4536	84.5105	73.4973	91.0003	115.544	88.042	96.2072	120.651
ILWL309	372.851	53.6382	223.72	36.9402	118.124	107.246	106.476	34.1164	151.713	130.308	76.9698	146.076	127.635	133.152	146.706	177.724	132.611	100.884	128.083	99.5315	101.048	108.069	100.001	138.7	148.58	139.35	152.028	119.223	88.8107	98.1549	130.639	179.919	63.5814	120.024	103.878	189.31	165.284	107.914	102.266	133.604	64.743	117.687	141.769	147.828	85.9083	66.0747	72.3781	196.763	74.4517
ILWL310	331.449	24.218	182.734	29.9329	104.064	99.98	104.638	13.1638	123.598	95.8359	53.5711	121.267	109.33	111.993	115.129	144.394	97.1382	106.32	96.3333	71.2363	105.659	102.16	104.162	111.166	119.032	104.797	115.703	98.0363	87.4037	75.1991	96.3605	146.964	74.9929	90.8154	79.0558	150.108	133.991	80.5693	80.8395	97.6942	63.075	88.7081	113.791	115.344	71.7571	71.369	60.5136	160.116	80.3896
ILWL312	308.999	27.7401	160.705	45.526	102.346	103.177	110.3	32.4777	108.097	77.8302	49.1158	111.02	104.645	105.225	100.564	127.694	79.5699	115.637	82.3929	62.0666	114.267	105.749	112.813	100.509	105.827	87.9785	96.8146	91.7447	93.5062	69.6237	80.1716	130.298	88.0363	78.4381	71.073	129.267	119.149	71.1382	74.973	80.3726	71.8093	76.8527	101.715	99.9144	71.884	82.8466	64.1868	140.469	90.6155
ILWL313	331.091	21.9049	182.312	28.0269	104.601	100.801	105.154	10.0161	119.822	93.2254	50.5993	121.191	109.294	111.937	114.577	143.729	96.3307	107.012	95.5107	70.6759	106.299	102.696	104.588	111.737	118.354	104.024	114.476	98.3492	87.1211	75.3298	96.7041	146.09	74.6363	90.3478	78.2414	150.213	133.574	80.3973	79.9932	98.1245	62.7125	87.8597	113.22	114.773	70.7287	71.5275	59.5102	158.891	80.0464
ILWL317	220.949	103.839	69.8563	125.151	157.689	169.096	180.458	121.276	116.333	85.1738	116.963	139.285	151.08	145.743	110.759	116.974	85.5349	192.097	102.448	110.798	189.918	172.411	188.418	126.986	120.467	92.6192	82.7913	138.213	167.072	124.628	94.1459	119.153	173.281	110.282	119.703	85.0565	121.26	114.969	129.299	87.3996	153.066	110.896	123.83	106.88	139.192	165.697	139.655	102.886	171.399
ILWL324	264.963	71.0051	120.527	90.1961	108.656	117.43	127.767	79.0983	85.3652	41.7088	63.4596	100.573	100.767	97.0859	70.7392	89.9295	43.4183	139.1	56.518	57.5756	137.207	120.662	135.075	86.9686	78.6955	52.7833	53.5477	92.1982	115.062	75.6749	60.2524	92.1868	121.086	68.2726	72.336	90.8607	88.3255	68.7558	80.0701	56.6458	101.31	60.0005	79.8069	68.7461	88.475	113.07	85.4012	93.3924	118.341
ILWL325	272.48	125.875	149.349	141.492	67.7388	87.1904	101.096	124.745	88.0859	59.5365	81.0151	40.8411	59.1769	52.2452	34.6836	52.1099	48.1659	118.561	37.4945	54.1803	114.879	90.9061	114.858	24.6547	37.8528	41.2673	50.8745	49.2353	98.8765	55.7254	24.5281	54.4171	122.741	35.862	53.1323	65.6767	34.075	44.5855	60.1893	26.1272	102.251	45.2646	35.6735	33.328	78.8228	111.699	88.1036	80.9741	112.804
ILWL326	259.592	67.8692	111.633	88.7988	119.444	128.197	138.632	80.6044	94.5977	55.5072	73.5691	110.204	113.86	110.247	83.7532	101.163	56.4702	149.265	69.9178	69.992	147.272	131.442	145.539	96.9837	92.2996	65.62	64.3453	102.235	124.718	85.1651	66.9114	103.592	129.304	77.2019	81.8094	91.1277	99.7568	78.0693	90.2573	62.401	109.506	74.0356	93.1594	81.1679	97.739	121.69	95.6102	101.39	127.587
ILWL329	372.093	55.0436	223.517	41.1754	111.657	100.796	99.7935	34.633	145.693	126.476	71.3726	139.579	121.911	127.493	142.757	173.897	129.682	94.3262	124.391	95.3108	94.3067	101.284	93.3672	133.558	144.279	136.052	149.108	112.915	81.7004	92.6332	126.324	176.02	56.1221	114.668	98.0397	185.943	160.919	102.59	95.6834	129.675	57.3932	113.404	137.06	143.856	78.942	59.4486	66.0858	194.001	67.5227
ILWL330	222.394	106.258	79.3107	127.451	136.123	149.392	161.364	118.749	93.4411	59.0999	101.838	114.608	126.462	119.905	82.1949	86.4037	57.7559	174.783	77.5332	90.5925	172.331	152.821	170.798	102.976	91.8516	64.2462	53.3067	116.222	150.468	106.195	71.6901	88.6716	160.23	88.834	100.926	63.8295	92.4244	95.3876	109.198	64.5535	139.303	85.7332	96.1265	77.8881	122.703	151.823	123.66	74.8579	156.431
ILWL331	353.266	119.197	221.813	123.016	21.1704	19.4813	24.2711	104.046	107.395	97.7572	60.5176	60.9787	39.3768	48.0513	88.5023	116.912	98.4119	40.1052	80.0792	60.3612	34.0338	17.4173	35.7453	65.3151	83.5052	96.3699	113.528	37.3049	24.1539	43.5192	83.8445	117.879	52.9342	63.332	49.1326	146.856	97.099	54.3421	38.5932	91.244	43.5295	67.1832	72.6416	91.194	34.0324	46.0365	42.1629	151.271	40.4135
ILWL332	297.324	38.8721	150.216	56.9398	101.056	104.243	112.24	44.1218	97.0924	63.2483	46.0176	105.667	99.5794	99.0492	88.9647	114.801	66.0043	119.644	71.2425	55.0366	118.053	106.988	116.227	94.4167	94.6745	74.9781	82.5192	88.7748	96.3432	67.4924	72.5831	117.203	94.4996	72.2217	67.3544	118.899	108.105	66.7375	71.9711	72.0625	76.8376	66.7315	91.8067	88.1074	72.4936	88.3004	65.2035	125.662	95.078
ILWL335	366.034	47.5247	217.146	33.1048	116.006	105.264	105.285	27.5167	146.78	124.601	72.2917	142.097	124.468	129.399	141.721	172.521	127.192	100.658	123.036	94.6702	101.537	106.236	99.6742	134.122	143.846	133.934	146.554	115.987	88.8944	94.7347	125.681	174.926	64.8153	115.866	99.9644	183.259	160.491	103.484	98.622	128.204	63.8549	113.281	137.511	142.8	83.4006	66.3067	69.3655	191.277	75.701
ILWL341	369.104	50.1601	219.829	34.3336	114.806	104.266	103.902	30.5851	148.451	126.296	72.8061	142.222	124.2	129.676	142.677	173.806	128.737	98.9443	123.679	95.2457	99.1522	105.153	97.9078	134.386	144.612	135.302	147.873	115.482	86.0052	93.9357	126.298	175.988	62.0671	115.702	99.4309	184.89	161.13	103.394	98.4174	129.181	61.8041	113.907	137.916	143.821	82.0169	63.6935	68.8488	192.788	72.4201
ILWL342	364.858	46.5789	215.957	33.0865	112.15	102.249	102.159	26.3831	141.45	120.918	67.3904	137.928	121.109	126.173	138.828	169.687	124.623	97.9688	119.992	91.569	98.2007	102.94	96.6776	131.014	140.779	131.237	143.656	111.936	84.0093	90.6691	122.356	171.853	60.4426	111.548	95.3419	180.556	157.303	99.5655	93.9302	125.231	58.993	109.946	134.118	139.814	78.1598	62.4725	65.144	188.54	71.0363
ILWL343	383.977	121.368	247.676	118.462	54.2415	32.5024	21.3709	101.936	140.499	126.123	76.7195	98.0556	69.4843	79.5687	118.612	148.971	125.443	10.5723	107.019	82.2932	11.4786	30.3753	9.89495	96.2843	114.12	124.722	142.604	72.0296	28.4677	68.7838	114.105	150.374	35.8156	95.0484	77.1286	178.917	129.547	81.8002	69.2837	120.486	42.0854	95.1471	104.594	122.075	54.1442	30.7512	50.8638	182.529	27.5774
ILWL344	295.037	31.5397	145.1	52.6448	113.623	116.77	124.648	46.2425	107.434	74.6843	59.0555	116.845	113.979	113.63	101.411	126.049	77.8714	131.245	82.9369	68.626	129.729	119.405	128.096	105.007	107.816	86.5904	91.6497	100.722	107.4	78.5956	80.5596	128.419	104.538	82.0542	77.6836	121.685	119.267	76.9501	84.3588	79.1388	87.3284	81.5104	105.331	100.19	83.437	98.7329	78.2053	133.691	106.058
ILWL345	332.19	34.4666	184.25	39.1985	91.9667	87.5394	92.4303	21.648	119.535	90.2739	43.7254	111.225	97.4863	100.843	106.335	136.833	91.1212	94.8817	86.7537	60.3199	94.263	89.8138	92.5035	100.183	109.542	97.6235	109.676	86.899	75.4746	63.2576	88.592	139.267	65.9501	81.1773	67.7407	145.488	124.788	69.4141	70.145	90.5026	52.2764	79.5662	103.955	107.073	59.8249	60.4625	48.62	154.827	69.703
ILWL346	157.629	233.105	116.888	253.605	201.382	221.9	235.61	241.523	167.925	154.53	206.389	162.21	188.535	179.095	141.988	116.325	146.489	253.721	155.22	182.354	250.241	225.337	250.011	156.74	146.968	141.499	128.376	183.155	234.276	190.056	145.558	116.26	257.506	164.58	184.488	83.7953	128.661	177.021	192.152	140.244	236.269	168.321	154.318	138.216	212.053	246.954	220.795	96.4306	248.166
ILWL347	251.116	119.827	125.777	137.5	90.0735	107.797	120.506	121.857	66.7424	29.9328	79.8704	62.8716	76.0148	67.804	26.8195	36.2379	23.0489	137.303	32.0822	57.4909	133.985	111.03	132.847	52.7206	35.4023	17.4818	14.6597	70.6529	114.658	70.4154	33.966	37.9436	133.894	47.657	64.5949	54.6531	34.952	58.3791	71.2303	30.9092	112.98	42.1183	39.9909	21.3479	90.2439	124.188	95.4758	52.677	125.571
ILWL348	242.533	130.324	122.23	148.038	100.445	118.537	131.028	132.702	68.5901	36.4418	91.1529	71.6927	84.6127	75.8945	32.5248	29.287	30.7834	148.08	42.5409	69.2371	144.691	121.705	143.512	63.1389	40.0546	25.6128	14.121	81.7935	125.803	82.855	47.206	30.1064	145.235	60.1815	77.0566	53.3589	36.5115	71.3179	82.9553	44.184	124.725	51.9988	46.732	27.4002	102.118	135.702	106.866	40.0459	136.644
ILWL349	365.326	50.3263	217.015	38.944	107.014	96.687	96.6622	29.2735	141.188	120.513	66.053	133.888	116.759	121.965	136.346	167.431	123.094	92.2947	117.998	88.9631	92.4253	97.5039	91.2227	127.153	138.098	129.461	142.631	107.441	79.2083	86.8758	119.58	169.711	55.5094	108.651	92.398	178.901	154.562	96.4161	90.3899	122.713	54.2306	107.357	131.073	137.404	74.556	57.2967	61.4373	187.581	66.1826
ILWL350	159.368	229.588	114.839	250.118	198.282	218.854	232.583	238.043	164.801	151.493	203.056	159.045	185.715	176.28	139.267	114.006	143.477	250.642	152.346	179.225	247.106	222.283	246.94	153.748	144.358	138.603	125.555	179.903	231.016	186.74	142.082	114.003	254.126	161.199	181.163	80.2025	126.096	173.721	188.807	136.78	232.869	165.285	151.528	135.4	208.704	243.65	217.524	94.5068	244.868
ILWL353	373.552	56.8767	224.81	41.3606	114.292	102.596	101.834	36.34	153.252	130.392	76.5485	143.675	124.009	129.779	144.516	175.846	131.386	95.9574	126.078	97.189	96.3507	103.658	95.3011	135.55	146.201	137.808	151.146	116.248	85.3973	95.4332	128.935	178.156	60.3328	118.363	102.044	188.455	162.976	105.678	100.341	131.974	61.8013	115.673	139.315	145.857	83.8058	61.9119	69.7147	195.921	70.9216
ILWL354	368.894	53.5594	220.272	39.2988	110.602	100.338	100.137	32.939	147.998	125.424	72.0387	139.148	120.391	126.006	139.978	171.136	126.479	95.3035	121.634	92.963	94.8096	101.478	94.3172	131.49	141.796	133.075	146.163	111.861	82.1976	90.8837	123.82	173.326	58.6366	113.237	97.382	183.422	158.357	101.19	95.7712	127.009	58.4279	110.884	134.725	141.131	79.5965	59.8793	66.1499	190.904	68.2477
ILWL355	294.782	46.3552	148.522	63.7575	94.0091	98.2505	106.841	49.853	91.678	55.4747	40.2466	97.3973	91.7126	91.0243	80.234	106.735	58.5064	115.418	61.6475	46.269	113.783	101.055	111.775	85.3408	85.834	66.7218	74.7556	81.0992	91.5857	59.7669	64.264	109.037	92.8445	63.5405	58.9322	112.297	99.1534	57.9657	64.8211	63.9087	74.0177	58.4785	83.0702	79.576	66.5643	85.7214	60.7321	118.796	92.0891
ILWL358	267.185	125.266	143.958	141.461	72.5504	92.6025	106.452	125.054	85.5506	57.5391	82.6299	44.3911	64.3693	57.1308	35.6798	50.5156	45.4699	123.737	39.8079	56.8945	119.567	96.3087	119.978	32.2821	40.2084	39.6927	47.5662	53.225	102.749	59.0077	22.2285	52.7554	125.875	37.2247	56.2006	60.6448	35.43	48.0674	62.8666	23.1715	105.101	46.1795	38.2278	32.869	81.9829	115.181	91.099	77.1201	116.137
ILWL359	272.88	120.934	147.845	136.759	67.4679	85.9431	99.9042	119.906	87.3429	57.4561	77.528	42.6347	59.4238	52.5824	35.5198	54.676	45.7074	116.962	36.3929	50.9924	113.523	89.7614	113.337	26.0712	39.4899	39.8954	50.4742	48.5662	97.3537	53.3721	21.5234	57.4023	119.934	34.441	51.1459	66.4675	38.1169	42.2046	58.0973	22.7384	99.2991	43.2761	37.0971	34.0525	76.5751	108.988	85.0296	82.6693	110.629
ILWL360	263.799	89.3229	125.747	107.253	89.9829	103.539	115.111	93.2698	70.1271	23.0644	59.3589	75.4243	80.711	75.8389	46.3983	66.6947	23.4817	129.244	33.7576	44.4855	126.147	106.723	124.841	63.1606	54.3101	30.0481	32.4762	71.4982	103.866	60.2231	36.131	68.3776	117.367	45.1211	55.0214	73.7267	62.0865	50.4727	63.6196	33.526	96.1914	39.7163	54.8664	43.6521	77.1342	108.298	79.3813	76.8064	111.318
ILWL364	238.944	153.272	129.194	171.221	104.455	124.869	138.735	156.002	100.258	76.5865	115.305	69.3366	93.7168	85.1537	54.0866	45.8076	64.724	156.579	65.3919	89.2334	152.788	128.479	152.91	60.4213	58.9432	57.6632	54.8639	86.1948	137.076	93.6807	52.5091	47.598	160.978	70.0979	89.6509	38.46	42.4798	81.6746	96.8342	49.2453	140.211	76.5188	62.7242	50.5384	116.391	150.172	125.64	61.5679	151.125
ILWL365	313.167	113.115	183.888	123.433	26.3353	47.2272	60.4141	104.963	90.3796	69.62	56.8633	32.603	29.0208	29.9977	53.2538	81.4444	64.7248	77.7375	46.0983	37.9381	72.6629	50.4709	73.7618	27.1787	50.6233	61.2043	77.2266	9.83166	56.3654	23.4933	43.9295	82.7621	83.1198	27.6369	27.114	105.958	60.5306	24.6505	27.1208	51.37	64.4676	38.2509	39.6677	54.9188	41.9146	72.5585	53.5416	114.413	71.5082
ILWL366	136.991	290.546	160.848	309.791	263.872	283	295.451	297.74	213.154	203.335	262.784	228.022	244.51	234.696	194.779	163.731	197.786	313.642	210.591	239.809	310.658	286.311	309.266	222.593	198.352	193.766	178.697	247.717	295.283	253.75	213.581	162.28	316.62	229.816	248.214	160.033	184.498	241.83	253.87	208.691	296.791	221.779	208.19	191.977	273.891	306.644	278.315	133.471	307.089
ILWL367	221.654	143.433	106.21	162.121	120.002	138.259	151.169	148.146	84.725	54.7405	110.844	89.4256	104.07	95.1273	49.9069	34.3984	46.5293	168.3	60.5892	88.1304	165.017	141.747	163.875	79.4459	57.6088	42.836	26.3849	101.232	146.386	102.069	62.1508	35.2229	165.669	78.9346	96.6644	42.2353	49.0036	90.0957	103.579	57.156	144.829	72.1291	65.703	45.3121	122.523	155.708	127.045	22.8092	157.18
ILWL369	223.125	166.631	123.268	185.133	121.091	140.464	153.88	169.62	100.338	78.698	127.636	84.6778	105.468	95.6943	58.2208	34.8347	69.3486	172.102	73.6728	101.62	169.214	143.863	168.13	76.3889	62.5882	61.4434	53.6353	103.499	153.944	110.925	70.7959	36.1302	177.078	87.1422	105.858	40.2699	45.258	98.3246	112.224	66.7732	156.655	86.2383	70.5091	55.0191	132.57	166.516	139.805	40.6832	167.5
ILWL370	148.583	272.321	151.144	291.376	242.432	261.487	273.921	278.691	194.355	183.569	242.571	206.928	222.953	213.148	173.607	142.388	177.598	292.141	189.78	219.106	289.186	264.8	287.783	201.333	177.002	173.198	158.622	226.525	274.113	232.873	193.264	140.93	295.738	209.209	227.51	141.678	163.125	221.099	233.05	188.592	276.032	200.932	186.838	170.929	253.09	285.711	257.551	113.191	286.071
ILWL371	197.8	169.321	98.3492	189.301	142.108	162.053	175.401	175.86	101.727	83.7824	138.61	104.84	127.912	118.288	76.943	54.1162	77.6009	193.123	89.3954	116.412	189.604	165.333	188.936	98.843	83.3354	73.364	58.9431	122.519	171.566	126.826	82.5778	54.3629	192.539	101.045	120.642	29.6767	68.4987	113.881	127.614	77.3671	171.361	101.048	90.6652	72.2204	147.681	182.761	154.74	34.6559	183.921
ILWL372	144.225	183.606	33.8768	204.592	200.576	217.69	230.853	197.556	148.234	125.884	178.652	169.252	188	179.541	134.887	119.274	120.987	246.44	139.762	161.956	243.364	221.43	242.364	159.131	143.738	122.734	105.467	180.094	222.516	176.065	132.806	120.182	236.832	153.47	170.416	79.6442	134.399	163.814	179.284	125.443	215.338	151.602	151.201	130.229	195.768	227.524	199.224	85.6856	231.051
ILWL373	348.006	108.982	214.242	112.868	21.2155	18.5949	27.1938	94.0295	108.777	93.0595	53.4719	62.5098	38.7857	47.4948	84.1135	114.151	91.5251	41.8192	73.7282	51.494	36.0709	20.4296	37.6986	61.6548	80.2647	90.3663	107.871	34.6166	21.8616	34.4826	77.4594	115.486	49.1362	58.2436	43.1478	142.164	94.5802	47.2714	34.305	84.437	36.2624	60.8665	69.6443	86.7804	27.8427	39.3156	33.5733	147.384	36.3791
ILWL374	241.918	84.7568	94.663	105.618	148.342	157.761	168.117	100.754	107.433	77.6554	101.988	135.179	142.325	137.575	107.803	118.453	79.1757	178.341	98.4262	100.639	176.153	160.916	174.74	124.731	116.96	88.8584	83.3608	130.243	153.836	115.302	92.1476	120.88	156.074	104.97	111.719	99.3904	122.175	108.219	118.552	87.0408	137.262	101.299	118.72	104.206	127.007	149.888	124.398	109.972	155.648
ILWL376	305.424	126.695	181.473	138.18	34.9615	58.1556	71.2805	119.745	89.825	71.5851	70.7151	22.5131	32.0844	29.0773	48.2938	72.0122	65.1925	89.4675	47.654	49.115	84.2519	61.1808	85.6195	20.771	44.7564	59.6516	74.2726	20.0539	70.229	38.928	43.1836	73.0508	98.2206	31.9889	39.6701	98.3098	50.2719	35.9011	40.1549	50.4066	80.1912	42.7555	34.0968	49.5745	57.1738	87.9692	69.1245	106.646	86.1679
ILWL377	339.906	119.715	210.435	126.076	9.8214	23.0937	34.0241	106.712	100.871	88.782	59.6901	47.0504	28.2244	35.5732	75.9018	103.754	87.8729	51.8408	68.8603	52.602	47.1309	24.006	47.8547	50.3821	70.9431	84.8353	102.013	23.7648	36.593	36.0037	71.4026	104.941	65.0004	52.1082	41.0212	133.03	83.3585	44.1088	31.7087	78.6646	51.7975	57.4613	60.1117	78.5204	35.5639	56.385	45.7698	138.815	53.0893
ILWL378	172.761	155.533	40.1936	176.827	187.893	203.325	215.987	170.61	135.342	113.843	159.159	160.25	178.397	170.553	130.28	122.557	110.097	229.882	131.666	147.349	226.763	206.939	226.111	151.571	139.924	115.064	101.115	167.101	205.444	160.572	120.252	124.421	215.585	140.475	155.653	81.8168	134.593	149.776	163.375	113.282	194.784	139.66	145.04	125.218	178.259	207.692	180.375	97.4366	211.911
ILWL380	320.277	122.325	193.813	131.999	20.8762	44.1805	56.0752	113.001	87.9352	75.8781	62.1906	26.6247	26.3033	27.6091	60.0793	85.7297	74.2204	74.0706	56.1149	48.4302	68.7036	45.926	70.0254	33.9413	55.5589	70.0224	85.6767	9.29788	54.5264	33.4583	54.2506	86.6241	82.9521	36.1638	34.3517	112.988	64.8246	35.0935	28.7192	61.9133	66.3278	46.5937	44.1153	61.7211	43.7348	73.9833	57.0374	120.412	71.0612
ILWL381	281.929	127.625	159.821	142.276	58.0236	79.736	93.2137	124.85	82.1211	61.0549	77.5954	27.6437	51.0676	44.2302	37.6838	56.1155	53.2485	111.094	41.3231	53.635	106.498	82.8954	107.238	21.6402	37.9395	46.7888	57.6887	39.0183	90.5035	50.772	28.198	57.5417	115.962	30.2878	47.7072	74.59	36.2639	41.148	52.0325	33.3267	96.0594	42.9959	31.69	36.435	71.8348	105.684	83.0248	87.6777	105.298
ILWL382	383.158	124.514	247.992	122.352	50.2363	32.1259	21.6532	105.414	136.935	125.608	77.7212	93.8804	67.611	77.5116	117.813	147.414	125.085	16.2535	107.483	83.4562	5.78888	29.3764	14.8563	95.1629	113.144	124.381	142.134	68.529	25.1452	67.9501	112.472	148.611	37.363	92.8995	76.1228	177.353	127.959	81.3392	66.9534	119.416	42.7993	94.2481	102.829	120.923	53.1111	34.1593	52.5634	181.384	27.0465
ILWL384	107.768	425.271	254.251	446.534	425.279	445.547	459.176	440.04	366.928	359.848	416.628	385.845	411.357	401.63	359.485	332.485	355.416	476.796	370.833	397.3	473.222	449.027	472.779	380.938	365.65	353.868	336.753	405.607	454.478	408.619	362.658	331.932	473.755	382.651	402.139	297.516	349.913	395.403	410.201	356.273	452.011	383.397	374.074	355.247	429.319	464.094	435.948	299.292	466.111
ILWL385	303.051	89.6439	167.194	101.406	49.0218	59.3017	71.7592	83.7668	91.4201	56.8331	42.7393	55.4442	45.8557	45.7543	50.0401	81.5393	49.636	86.0526	34.0543	17.0083	83.1989	63.4753	82.2331	38.5968	51.602	49.6202	65.953	36.1866	64.6705	21.7784	38.3034	83.8727	82.2768	30.0127	26.5347	101.125	64.9669	19.0439	32.6616	42.0003	61.3927	28.7182	45.0728	51.5032	43.2394	70.3762	46.0348	108.672	73.9184
ILWL386	283.534	141.681	169.201	155.044	67.1809	85.7551	97.3361	136.136	75.1813	57.1124	84.6003	43.2176	46.9047	37.1333	26.5686	38.8534	52.3101	115.746	41.9583	60.598	112.391	88.3695	111.259	40.5043	18.4934	43.3387	54.3914	55.0328	99.3055	67.225	54.9443	38.9224	123.757	52.6576	64.1118	88.682	25.4191	60.0664	64.0896	58.3515	106.346	41.543	18.2948	28.5616	83.6179	114.236	89.6042	75.9528	112.682
ILWL402	371.08	54.2143	222.509	40.0805	111.304	100.485	99.6725	33.4823	146.037	125.84	71.1192	139.397	121.261	126.836	141.738	172.895	128.542	94.3607	123.362	94.3534	94.3391	101.146	93.381	132.866	143.321	134.967	148.048	112.571	81.7706	92.069	125.609	175.046	56.5609	114.211	97.7208	185.192	160.019	102.056	95.5146	128.871	57.4506	112.442	136.198	142.871	78.9519	59.2835	65.6922	192.914	67.5645
ILWL416	365.035	47.7577	216.125	34.1529	110.67	100.238	100.289	26.7458	143.849	121.361	67.8617	137.484	119.557	124.819	137.684	168.81	123.88	96.0033	118.743	90.2115	96.4065	101.206	94.8388	129.484	139.623	130.348	143.109	110.967	82.9282	89.4202	121.598	171.062	59.7681	111.104	94.8343	180.222	156.204	98.6342	93.7835	124.432	58.2404	109.026	133.036	138.856	77.8232	60.7695	64.2209	188.042	69.9273
ILWL417	280.695	49.9803	132.917	70.2047	107.777	114.548	124.084	60.4645	97.2955	61.6136	59.7215	105.903	105.938	104.005	86.9676	109.506	61.3943	133.038	71.1428	61.6201	130.573	117.716	129.612	94.213	94.2888	71.0499	75.3459	92.6211	108.23	73.2778	66.2041	112	109.92	71.6928	72.2993	105.007	104.471	69.9314	78.871	64.1596	90.8634	69.4997	92.2664	84.9636	83.0385	103.003	79.4352	116.477	109.149
ILWL422	370.252	53.6584	221.625	39.2861	111.698	100.29	99.7334	32.4505	148.286	126.063	71.9377	140.125	121.069	126.63	141.084	172.36	127.89	94.4147	122.546	93.6153	94.9441	101.233	93.5524	132.319	142.77	134.264	147.515	113.097	83.112	92.205	125.512	174.654	58.3464	114.746	98.2854	184.874	159.567	102.077	96.5492	128.53	58.874	112.219	135.958	142.38	80.2025	59.9693	66.0966	192.366	69.1004
ILWL423	321.898	25.1819	173.417	35.9489	100.945	99.0971	104.864	20.2894	116.241	85.8679	48.4205	115.612	104.341	106.397	106.018	134.785	86.8684	108.427	87.0734	63.742	107.238	101.587	105.78	104.597	110.376	94.8566	105.069	93.3748	87.4249	70.0248	88.0428	137.232	78.7887	83.594	73.3224	140.864	125.115	74.347	76.3423	89.1232	64.5843	80.2443	105.63	106.089	69.3746	73.8989	58.8806	149.316	82.1459
ILWL424	316.471	26.5232	168.12	39.8937	100.33	100.054	106.417	25.7121	112.064	81.3286	47.3668	112.908	103.171	104.742	102.398	130.6	82.3772	110.925	83.7041	61.6207	109.287	102.631	108.083	102.094	107.09	90.6617	100.273	91.5849	88.6298	68.4695	83.8407	132.985	81.8521	80.1845	71.1821	135.702	121.381	71.9709	74.6128	84.7362	66.5426	77.0415	102.489	102.174	69.1841	76.6494	59.8844	144.35	84.3307
ILWL425	326.027	29.6605	178.188	38.4981	97.0006	95.686	100.96	21.6476	112.278	86.5058	45.1049	112.234	102.216	104.521	107.029	135.934	88.8113	104.26	88.7831	64.1991	102.239	97.7475	101.573	104.067	110.911	96.6909	107.327	89.6931	81.7394	67.3237	87.5869	138.169	72.5617	81.2697	70.4832	142.408	125.608	72.7579	71.9431	89.6081	58.5236	79.8179	105.087	106.87	64.2466	69.0049	54.9463	151.723	76.1862
ILWL426	353.565	39.9117	204.935	30.4483	105.697	98.0666	99.8154	18.6918	135.852	111.748	61.1699	130.184	113.801	118.389	128.433	159.027	113.231	97.8417	109.799	82.0783	97.0153	99.5833	96.1972	121.88	130.964	120.271	132.559	104.134	81.2035	82.066	111.448	161.268	62.0963	102.231	87.5924	169.388	147.102	90.894	87.1151	114.144	56.3782	99.8261	124.431	129.234	73.1318	61.2832	60.1369	177.284	69.8585
ILWL443	340.925	28.3464	192.209	27.8697	103.571	98.0426	101.165	9.81027	123.692	100.072	51.9403	122.939	110.239	113.679	120.296	150.184	103.808	101.428	101.233	74.6654	100.883	99.4712	99.2951	114.852	123.395	110.965	122.241	99.026	82.5721	76.518	101.986	152.47	67.1444	93.6868	79.8532	157.636	138.896	82.9668	80.47	104.096	57.3918	92.6251	117.499	120.707	68.7539	65.5272	57.4203	167.035	74.1211
ILWL444	384.33	131.619	251.17	130.467	52.9957	42.2676	33.2421	113.409	128.887	125.681	80.501	91.3218	70.3989	79.3963	120.311	148.184	128.299	32.8197	111.522	89.3459	24.5546	37.7112	30.5052	98.6898	115.085	127.371	144.187	69.618	30.4213	72.7908	115.043	148.804	44.8549	93.8158	78.1792	178.525	129.1	85.0578	67.1674	122.636	49.7871	97.1031	104.167	122.907	55.4252	46.0925	59.1098	182.008	35.3796
ILWL447	296.92	134.09	177.946	145.604	52.1254	70.736	82.5148	126.586	84.0237	62.0953	76.2919	40.5044	31.914	23.8216	31.2186	52.7435	54.2117	100.804	39.8356	51.2451	96.7885	73.9192	96.3904	34.4402	23.2839	47.0519	61.8548	42.8642	84.4141	55.0267	53.3982	53.3002	109.553	46.9015	55.0644	98.6927	35.9533	51.2221	53.8302	58.1926	92.6195	34.0227	14.9205	34.3958	71.5725	99.3091	76.9415	89.3371	97.5194
ILWL455	373.349	123.338	239.699	122.704	40.3724	24.2185	17.469	104.892	130.119	116.789	72.9629	85.0439	56.2109	66.3214	106.697	135.986	115.002	22.9696	97.2847	74.7623	14.0324	22.9433	19.6278	85.2878	101.81	113.943	131.821	59.4675	23.244	60.081	103.589	137.122	42.9581	84.419	68.8914	168.092	116.75	73.4552	59.7523	110.592	42.9943	83.8501	91.5002	109.953	48.6098	36.5375	48.242	170.215	29.6942
ILWL456	374.871	58.7322	225.951	43.5863	110.419	99.0682	97.8077	39.088	150.485	128.888	73.2849	140.382	121.06	127.32	142.989	174.612	130.919	91.8878	124.1	95.2051	91.7849	99.7517	90.9958	132.986	144.31	136.878	150.045	112.813	79.5155	91.8889	127.084	176.624	54.9663	115.087	97.9896	187.488	160.874	102.41	96.5646	130.506	56.7963	113.927	137.085	144.385	78.7158	56.9468	66.1439	195.088	65.1272
ILWL466	179.274	234.192	138.485	252.588	195.909	214.252	226.732	238.501	158.696	143.151	199.83	161.875	175.886	166.109	127.734	96.3268	135.208	244.971	144.844	174.38	242.439	217.693	240.765	154.601	130.545	129.41	116.914	180.863	228.614	187.958	150.248	95.2554	250.871	165.505	183.235	105.238	116.591	176.349	188.52	145.801	231.436	156.371	140.769	125.612	208.572	240.331	212.854	72.6847	240.898
ILWL467	287.245	46.0123	139.141	65.4968	103.567	109.209	118.605	55.1931	102.065	65.4881	56.5034	104.64	102.987	101.828	87.6632	112.007	63.9267	127.024	70.5409	58.3771	124.75	112.482	123.778	91.8219	94.5997	72.897	78.837	89.4365	102.788	68.7767	65.7911	114.601	104.121	70.1036	68.9214	108.581	105.259	66.5234	75.9856	64.2838	85.1854	68.979	92.0017	86.1746	78.4321	96.8358	74.4819	121.131	103.49
ILWL469	250.616	78.4666	103.722	99.6832	119.18	130.1	141.449	90.79	94.1445	56.3724	80.0248	105.87	113.84	109.35	80.5967	95.4574	54.0808	153.089	69.3544	72.7435	150.527	133.553	149.429	93.2711	89.7769	62.7052	60.0408	100.585	128.217	86.0328	60.5206	98.0474	135.258	74.5727	82.5944	79.158	94.5982	77.834	91.2929	55.1768	114.695	74.2549	90.7018	77.23	101.089	127.243	101.097	94.9633	132.625
ILWL475	342.307	26.5388	192.851	21.6718	109.827	103.194	106.263	9.32416	132.473	105.133	59.1662	130.195	115.567	119.222	124.331	154.312	107.468	105.967	104.62	78.8008	106.145	104.979	104.032	119.621	127.663	114.63	125.623	105.861	88.9752	82.3878	107.263	156.724	73.1348	100.093	86.298	161.658	143.288	88.5584	88.1295	108.745	64.3174	97.5965	122.496	125.035	76.1276	70.4591	63.6537	170.234	80.0188
ILWL476	105.485	233.547	78.0395	253.944	242.222	261.039	274.123	246.558	182.993	167.906	224.684	208.333	227.684	218.615	173.57	151.129	163.4	290.649	182.406	207.135	286.915	264.671	286.305	200.903	181.13	164.089	146.083	222.357	266.547	221.192	177.623	150.814	282.646	197.201	215.392	121.064	169.85	209.237	223.198	171.239	261.449	193.272	189.24	169.025	240.948	273.508	244.814	113.372	275.725
ILWL477	341.339	122.32	213.071	127.839	22.5221	31.1025	38.1571	108.119	96.5812	85.9428	59.5444	53.5225	25.9053	33.6934	74.2052	101.343	86.1066	55.0368	68.5868	53.6862	49.9156	31.4171	50.2431	57.5569	68.2738	83.4021	100.461	33.5602	39.6368	43.0165	77.032	102.005	65.8793	57.4869	47.3082	137.637	83.0298	51.3532	36.5864	84.3215	54.4949	54.4897	57.6286	77.17	40.5403	58.3675	46.0913	135.966	53.2171
ILWL478	373.103	126.213	240.617	126.067	40.826	28.2003	21.2781	108.006	124.731	115.175	72.8498	82.9968	55.4517	65.1311	106.308	134.753	115.135	27.8858	97.8311	76.2528	19.7159	25.4298	23.9866	86.1633	100.954	113.91	131.447	59.257	25.1186	61.9551	104.415	135.62	45.2599	84.2864	69.1639	168.15	115.923	74.5401	58.5893	111.628	45.4164	83.5498	90.4876	109.401	48.8251	40.9545	49.7165	169.063	32.3635
ILWL481	369.41	51.8276	220.703	37.1464	115.083	104.482	104.149	31.4844	148.29	126.973	73.9654	142.387	124.448	129.68	143.224	174.109	129.05	99.0721	124.934	96.2641	99.2199	105.413	98.1696	135.192	145.174	135.841	148.72	115.767	86.926	95.0134	126.939	176.41	62.1603	116.653	100.823	185.552	161.826	104.647	98.9078	129.881	62.3572	114.239	138.341	144.268	83.2221	64.3674	69.5024	193.398	72.9977
ILWL484	227.445	188.271	143.582	205.089	134.785	154.045	166.148	188.883	108.075	92.5045	144.188	101.997	114.946	105.239	70.4994	38.4222	84.671	184.619	90.0481	118.726	181.346	157.152	180.256	97.0882	71.4126	76.8688	69.0458	120.583	167.695	129.914	97.2109	35.8561	191.369	108.313	125.459	75.7299	57.637	119.489	129.16	95.0806	172.62	98.834	80.4306	68.6513	149.407	181.275	154.816	38.2609	180.582
ILWL485	306.993	118.785	181.246	128.923	40.9785	55.0641	67.2718	109.602	89.1346	61.1742	60.9372	45.1376	20.5488	16.8457	37.0755	66.4099	53.4305	84.8102	34.0921	34.5834	81.9423	58.9243	80.4424	31.5708	31.6876	48.3439	66.2753	34.1474	69.2387	39.7323	51.8386	67.9348	92.4703	41.7838	42.7068	106.744	48.9365	38.6916	41.7285	56.8134	75.4294	25.7956	23.3399	41.3497	56.2331	81.3435	58.7938	100.929	81.1762
ILWL486	341.604	31.8053	193.017	27.5793	111.672	106.651	110.155	17.3507	134.412	107.848	64.9552	132.058	117.947	121.245	126.076	155.238	107.797	110.015	108.125	82.6449	108.716	108.82	108.181	122.749	129.771	115.987	127.065	107.521	92.0231	85.3208	108.208	157.696	76.0748	102.304	90.6072	162.613	145.21	92.6063	91.0586	110.034	67.6206	98.6729	123.989	126.319	80.6139	74.0444	68.1607	170.86	82.356
ILWL487	350.418	35.7235	201.766	25.9179	117.278	109.5	111.801	18.1421	141.591	115.94	70.4689	139.446	123.58	127.228	134.185	163.762	116.742	109.841	116.028	89.5711	109.957	111.344	108.436	129.989	137.461	124.558	136.181	114.522	95.4879	92.6145	117.681	166.389	75.7853	111.037	97.8716	172.23	153.568	100.026	97.6064	119.378	70.253	106.762	131.894	134.787	85.846	74.9332	71.7458	180.091	84.2816
ILWL488	305.772	28.63	157.764	46.8464	108.09	109.836	116.789	35.4148	105.092	76.3616	52.5589	115.079	109.197	109.294	102.4	128.223	79.4798	122.323	85.1366	66.5776	120.574	112.271	119.279	105.735	107.914	88.7488	96.3381	96.9141	99.31	75.5591	83.5774	130.637	93.3591	82.335	76.2427	130.1	121.333	76.6944	79.464	83.6298	77.5987	78.8255	104.137	101.391	77.4372	88.9763	69.4754	138.928	95.9508
ILWL489	215.05	184.953	129.923	202.529	141.309	159.825	172.321	187.117	110.905	91.1186	145.462	108.712	121.513	111.724	72.5897	40.8839	82.5112	190.509	90.5536	119.852	187.671	163.203	186.185	101.059	75.4072	75.6022	65.2793	125.972	173.155	132.91	97.4268	39.7187	195.428	111.04	128.356	68.8752	62.218	121.754	133.172	93.9532	176.053	101.163	85.404	70.3775	153.191	185.081	157.696	27.8181	185.394
ILWL490	166.254	160.871	31.9351	182.176	184.152	200.503	213.575	175.398	135.552	111.316	159.539	154.849	173.771	165.817	123.364	113.227	106.309	228.351	125.631	144.62	225.234	204.235	224.474	144.655	132.883	109.495	93.9385	163.346	204.006	157.728	115.255	114.789	216.768	136.28	152.465	69.0075	125.317	145.993	161.415	107.841	195.344	136.353	138.935	118.478	176.935	207.878	180.269	85.7367	211.865
EC-718617	170.408	226.621	120.868	246.793	190.521	210.641	224.366	234.076	162.804	147.833	198.022	151.898	177.63	168.242	132.539	107.489	138.812	242.465	146.071	173.025	239.242	214.14	238.885	145.734	137.176	133.192	121.431	172.841	224.178	180.378	136.748	107.746	247.766	155.57	175.204	77.6496	118.677	167.444	182.726	131.545	226.748	159.321	144.495	129.079	202.618	236.979	211.312	91.6682	238.296
ILWL10	173.77	237.5	133.975	257.721	194.966	216.266	229.579	244.334	161.06	153.603	204.772	153.752	182.237	172.6	139.054	112.043	147.225	248.081	154.006	181.144	244.367	219.252	244.34	151.909	142.662	141.127	129.275	177.363	229.276	187.159	144.128	111.393	254.012	161.035	181.076	86.0848	123.36	174.236	187.553	139.904	233.299	165.899	149.369	135.369	208.173	243.926	218.181	97.2995	244.128
ILWL20	235.972	128.14	112.8	148.323	109.517	127.767	140.036	134.105	57.9053	45.873	94.4991	73.7155	99.8709	91.3697	59.0452	58.3842	52.9632	156.305	62.2439	80.8361	153.039	129.973	152.038	72.8985	65.6236	51.2442	43.2572	87.7978	132.391	89.0999	48.8368	59.4265	150.297	62.8012	80.0194	41.3004	59.7402	75.5447	86.3554	45.152	129.229	70.0068	68.2621	53.6812	105.51	142.53	113.837	62.3416	143.867
ILWL21	301.918	125.374	178.895	137.222	45.8147	64.9414	75.7915	118.307	68.0693	55.3087	63.036	29.3288	32.0951	26.3546	40.3029	63.7161	57.6696	93.8654	40.4493	45.8012	89.8872	66.4835	89.0856	33.5904	34.3961	51.5711	65.1961	32.7148	73.8431	45.1911	49.3711	63.7663	99.2879	35.0393	40.2735	99.7485	45.5419	39.9177	38.5457	55.6239	81.8193	34.1222	24.9449	42.062	57.2942	90.6666	66.8314	97.1571	88.2625
ILWL23	242.065	148.762	131.14	167.528	102.427	122.775	135.571	151.692	72.6151	63.46	106.145	60.4577	91.762	82.4326	54.5237	47.3376	63.7346	153.371	64.5451	86.5745	149.965	125.047	149.321	61.5467	58.116	56.8725	53.0562	82.2584	132.56	90.9672	51.6493	48.023	155.439	64.0612	82.9361	40.9005	44.5819	77.3719	88.4642	49.6993	134.918	73.5363	61.0249	50.1365	109.312	146.579	119.986	62.8103	146.828
ILWL35	339.875	122.94	211.174	129.253	6.85984	25.7739	36.3342	110.284	102.568	90.4369	63.2868	46.0676	27.9823	35.6889	75.8698	103.158	88.8279	54.2482	69.5131	54.8563	48.5479	26.8747	50.2964	49.8448	70.6732	85.48	102.333	23.5171	38.1531	37.5069	71.6039	104.127	68.104	52.2946	42.5602	132.703	82.3085	45.4237	34.1532	79.0017	54.9953	58.3966	59.6155	78.4433	38.4458	59.2013	49.6202	138.406	55.188
ILWL39	285.949	100.959	154.86	116.786	70.1744	84.9097	95.0581	99.5536	42.6841	32.315	48.554	49.9777	64.0308	59.0515	51.724	73.3131	48.828	109.977	43.4192	44.4324	106.851	85.9618	105.37	53.1607	53.5106	48.3381	56.6702	51.1046	85.1138	49.1868	40.7203	74.1413	101.859	31.9252	38.1739	87.6666	62.2587	39.1098	40.6491	44.538	82.036	39.8748	48.8622	49.9096	58.2002	95.4403	66.8282	94.7177	95.7578
ILWL81	377.741	83.6106	233.955	78.2877	86.286	74.2981	70.0172	64.691	126.264	118.771	59.4283	115.969	99.379	106.02	131.631	162.544	126.336	64.3737	115.412	86.4754	64.042	72.1389	62.7527	117.001	130.427	129.783	144.373	91.0859	51.6422	77.4415	117.991	163.959	26.7924	99.9972	80.6552	180.93	146.783	88.2725	74.0792	123.429	34.1526	102.644	121.533	133.203	54.98	37.2107	47.9197	188.136	39.5675
ILWL83	131.419	316.851	176.699	337.862	283.789	304.787	318.176	326.479	243.346	237.157	290.855	242.74	270.684	261.068	225.594	197.375	231.128	336.624	239.862	267.585	333.12	307.887	332.94	240.006	229.606	225.988	212.109	266.188	317.851	274.818	230.682	196.639	342.124	248.635	268.579	167.81	210.736	261.571	275.778	225.636	321.05	252.809	237.192	222.003	296.068	331.827	305.663	175.104	332.49
ILWL100	306.768	131.21	184.642	143.015	36.5562	59.5662	71.8175	124.308	83.8229	72.502	72.489	11.0274	33.9946	29.9832	52.0784	73.5439	70.1301	90.2007	52.6609	54.4035	85.4115	61.443	86.2903	24.613	47.5784	64.0108	77.7719	21.5402	71.7602	43.8761	47.7086	74.298	100.036	34.5946	41.5094	99.511	51.9589	39.4605	40.1441	54.843	82.624	47.9156	37.3822	53.0794	58.3093	90.9082	71.8355	108.636	88.5083
ILWL108	389.664	137.348	256.573	135.673	54.5101	41.4638	30.6308	119.262	137.419	132.175	86.8886	94.5987	72.7902	82.5524	124.377	152.413	133.992	28.2372	115.217	93.6696	20.639	36.6731	26.8544	100.328	118.829	132.34	149.258	73.021	32.986	76.3496	119.294	153.026	49.3334	98.0908	82.0411	182.582	132.216	88.415	72.6204	126.763	54.9316	102.549	108.183	127.343	60.0633	49.0068	64.5659	186.921	39.3982
ILWL116	318.739	125.769	193.282	135.17	22.2703	43.2962	56.6416	116.295	99.2298	79.6046	68.4908	32.9017	21.5848	23.4687	56.2982	82.3841	73.0981	74.9912	53.1037	47.9292	70.5711	46.7942	71.3376	27.2291	51.5291	67.955	84.4872	17.8714	59.6787	36.1962	54.6779	83.7443	87.9805	41.0043	40.4733	112.129	60.6583	37.6005	38.4401	61.3542	71.6069	46.5078	41.237	58.9689	51.3067	77.0883	61.282	118.271	75.5675
ILWL160	265.909	150.192	154.168	166.14	80.4385	102.517	115.537	149.505	87.2953	71.6222	101.043	41.6997	70.7368	62.8168	45.5656	47.2383	65.539	134.07	56.0619	76.8796	129.8	105.197	130.164	39.9371	45.4885	56.4761	59.9675	63.3624	114.657	76.2715	46.1003	47.35	141.701	52.9216	71.0113	61.9955	30.271	64.9932	76.5007	47.6843	122.031	64.0565	45.2285	43.5752	96.3159	131.496	108.496	76.0288	130.597
ILWL165	125.288	346.495	198.206	367.709	317.541	338.368	351.847	357.081	275.799	269.38	323.292	276.639	304.583	294.992	258.884	230.884	263.325	370.184	272.653	300.251	366.765	341.54	366.544	273.424	263.187	258.577	244.298	299.771	351.302	307.768	263.217	230.246	375.179	281.667	301.55	199.454	244.501	294.453	309.086	257.922	353.953	285.924	270.906	255.275	329.161	364.841	338.585	207.171	365.784
ILWL166	160.276	249.355	133.605	269.734	211.704	232.92	246.427	257.361	178.542	168.757	220.146	171.469	199.291	189.921	154.897	128.38	161.49	264.805	168.903	196.209	261.017	236.123	261.099	168.019	159.059	155.908	143.162	193.994	245.509	202.53	158.77	127.792	270.019	176.633	196.709	98.395	139.853	189.61	204.018	154.084	248.996	181.613	165.986	151.217	224.132	259.604	233.966	110.342	260.146
ILWL167	223.236	173.991	126.494	192.658	125.089	145.98	159.586	178.02	110.744	93.1276	136.577	86.6507	113.681	104.754	72.9387	55.4354	84.0688	177.784	85.8497	111.405	174.064	149.252	174.07	80.9833	76.9115	76.7182	69.8249	107.158	158.575	115.968	74.507	55.98	183.314	91.1067	110.774	37.1348	57.8072	103.349	117.898	70.9178	162.589	97.9127	82.0517	69.4086	137.833	172.704	147.907	61.2183	173.276
ILWL203	176.635	222.488	122.101	242.66	183.858	204.566	218.127	229.775	154.219	141.944	191.922	143.975	171.494	162.143	127.297	102.376	134.439	236.369	140.803	167.739	232.902	207.798	232.695	139.495	131.603	128.48	116.658	165.943	217.411	174.147	130.646	102.23	241.578	148.565	168.346	71.5903	112.55	161.024	175.752	125.828	220.565	153.825	138.481	123.667	195.791	231.071	205.425	87.973	231.942
ILWL221	316.434	121.699	189.714	131.895	24.3632	46.841	59.1358	113.376	88.3006	73.5784	62.1974	25.0354	27.4503	28.3384	56.7405	82.743	71.7393	77.2407	51.7209	46.1833	72.394	48.8333	73.1752	27.8953	52.451	66.8671	82.0444	10.2879	57.399	31.754	50.2734	83.6156	86.1429	32.3512	31.4143	108.58	60.8413	31.0252	29.616	57.6788	68.741	45.2502	41.6284	58.5404	44.7065	76.4646	58.6267	116.99	74.2551
ILWL222	374.231	138.085	244.5	139.212	36.5688	26.3262	20.8215	121.16	129.738	121.449	83.2923	77.9136	54.6322	64.2198	108.044	135.038	120.482	30.9519	101.231	82.5938	23.5561	22.7542	28.646	82.7319	102.063	117.793	135.241	57.3938	33.9515	65.5249	105.27	135.875	58.7772	85.5136	72.151	167.12	114.591	76.6275	62.659	112.681	57.5117	89.0359	91.4516	111.202	55.8115	53.7712	61.5593	171.109	46.3681
ILWL235	282.135	150.567	171.381	163.871	72.7994	91.2278	102.626	145.338	82.5701	64.7023	93.4583	48.0292	52.1856	43.1933	31.469	37.3874	59.627	121.274	47.4388	68.4765	118.192	93.7822	116.841	43.7637	23.0476	49.4425	58.2735	61.9902	106	74.6981	61.4905	36.6724	131.694	59.9393	71.3427	89.3247	23.2182	67.0273	72.5008	64.2769	114.547	50.8483	26.062	33.9982	91.3111	121.754	97.9378	74.7708	120.089
ILWL237	149.576	261.613	137.861	282.28	226.672	247.412	260.929	270.195	191.325	181.758	233.863	186.286	213.866	204.355	168.875	142.056	174.87	279.238	182.714	210.076	275.819	250.619	275.574	182.432	173.137	169.43	156.371	208.882	260.441	217.1	173.131	141.65	284.503	191.293	211.135	111.397	154.237	203.908	218.524	168.098	263.433	195.831	180.49	165.276	238.648	274.072	248.11	122.506	274.953
ILWL238	239.245	161.707	134.609	179.454	107.135	127.622	141.28	163.976	103.035	81.9978	121.171	70.4616	95.5147	86.7701	57.3019	45.5236	71.5761	159.476	70.058	94.8315	155.93	131.019	155.8	62.6978	60.7146	63.3113	60.403	89.7213	141.07	98.9684	59.9753	46.7869	166.04	75.4255	94.4799	42.8399	42.2187	86.7283	101.321	57.1481	145.602	81.761	65.1981	54.3534	121.114	155.169	130.872	62.4338	155.798
ILWL254	347.05	112.595	214.171	116.881	18.3385	13.2602	24.874	98.1151	111.13	93.8314	56.637	60.5527	35.3986	44.5867	82.2908	112.248	91.7108	41.3802	71.993	51.2963	37.3809	16.2784	37.43	57.5896	78.0616	89.612	107.26	33.6073	26.7708	34.9307	76.926	113.681	54.2678	58.2062	43.2897	140.711	91.9145	46.3076	36.3615	83.637	41.7986	61.291	67.9518	85.3788	31.4822	43.662	37.5449	146.215	41.9642
ILWL314	329.764	132.244	205.217	140.902	22.7932	44.0936	53.6068	122.2	92.1517	86.2058	70.3236	30.4928	31.9676	35.0241	70.8072	94.4032	87.0688	71.4979	67.5649	60.3751	66.052	44.0189	67.5081	43.5144	65.035	82.0888	96.8804	22.5913	54.16	44.1875	66.5921	94.7546	84.5059	47.3601	43.4514	122.33	72.8983	46.1557	37.241	74.2267	70.2843	59.2949	54.1594	72.689	48.2762	76.7311	63.4158	129.662	72.1909
ILWL320	261.404	165.967	158.934	182.247	92.0037	113.637	126.264	165.032	92.1498	82.579	115.58	51.0075	80.5383	71.5701	55.6323	47.6542	77.2266	145.025	70.2186	91.7289	141.171	116.037	141.252	53.6984	54.343	67.7221	69.7473	76.4487	128.073	92.0212	62.4941	47.5245	155.256	69.2622	86.7014	65.3082	37.0563	80.9584	90.2237	63.3327	136.33	77.2246	55.8381	53.7167	110.846	145.447	122.534	76.07	144.219
ILWL357	187.672	202.025	113.852	221.999	164.657	185.042	198.743	208.856	138.102	122.451	171.456	125.781	152.389	143.113	107.51	84.4271	114.003	216.807	120.391	146.976	213.403	188.425	213.129	119.857	112.355	108.155	96.9137	146.422	197.614	153.721	109.967	84.7548	221.195	128.514	148.237	52.2627	93.8029	140.678	155.864	104.99	200.105	133.502	119.096	103.802	175.715	210.608	184.87	72.486	211.772
ILWL361	297.636	117.584	171.203	130.544	42.3939	60.7342	74.415	112.04	85.7472	62.4949	63.9935	27.0948	36.4831	31.5751	42.2116	68.2531	56.4499	91.9614	38.4924	40.2472	88.735	64.0444	88.2473	12.6255	40.6732	50.9944	66.3537	24.4977	73.979	35.6546	34.2665	70.3393	98.4913	26.653	34.6632	90.6248	47.624	27.626	37.6835	39.9408	79.2099	37.1073	32.5913	43.4701	55.9641	87.8704	65.774	101.521	88.5193
ILWL362	295.345	115.449	167.881	128.488	43.8522	63.5008	77.1905	110.572	85.9796	60.6872	63.436	29.6307	38.9994	34.8811	40.5374	67.0704	53.3133	94.5921	35.7516	38.8185	90.4964	67.0229	90.7505	14.2694	39.958	48.333	63.0935	25.1068	74.2252	33.5975	29.2923	68.858	99.1023	22.0477	32.9997	88.0355	46.3243	25.6072	37.8778	35.6914	79.2282	34.5831	31.365	41.3332	55.7844	88.2158	66.0917	99.0433	88.5863
ILWL409	267.933	132.64	148.306	149.167	73.307	94.6355	107.741	132.439	73.7069	57.1918	84.8214	34.6342	65.3728	57.4333	40.234	50.5575	53.7138	125.581	46.0551	63.3059	121.424	97.2128	121.594	34.0278	42.2162	46.6318	52.1516	53.0546	104.173	63.1515	29.7258	51.6237	128.736	37.4008	56.7179	60.1624	34.4043	50.8065	62.2258	32.1118	108.341	51.8442	39.8333	37.1334	82.786	119.2	94.6351	77.9161	119
ILWL436	329.31	94.031	193.507	101.307	29.5907	37.3645	47.7421	82.5611	95.0925	75.2927	38.4878	55.1775	40.4843	45.5788	71.1038	101.989	74.0132	61.2404	58.2851	34.6425	56.3103	39.9699	57.2046	51.5969	69.437	74.0676	90.6781	26.4172	35.6806	15.6715	58.7994	103.532	57.1875	40.2702	25.1612	124.455	83.4216	28.9192	18.5556	65.4497	37.4896	45.6156	59.1527	72.7815	19.1361	46.928	28.3191	132.275	47.1174
ILWL438	335.882	99.9445	201.366	106.99	35.9554	43.2324	49.5407	88.4314	85.079	78.6134	39.9876	55.2601	48.4439	52.8095	80.789	109.425	84.2352	61.8569	69.5984	48.5096	56.5853	42.3796	57.5013	61.9606	78.1756	84.0481	99.1483	33.1704	34.4411	31.6946	68.3685	110.342	55.345	46.7742	31.456	131.202	91.3257	39.7712	19.0565	75.5792	38.5607	56.2456	67.5406	81.8803	17.9521	50.0851	33.679	139.376	46.9068
ILWL462	340.744	134.722	215.422	141.241	13.6133	29.7857	39.9339	122.29	109.121	96.5998	74.8302	45.2963	26.7396	34.2812	76.5497	101.821	93.5848	58.4403	72.638	62.3863	53.7832	31.0243	54.9607	48.2472	70.2597	88.6892	105.357	29.7172	48.5582	46.9913	76.0236	102.699	78.9822	58.4659	51.4039	133.712	80.14	52.5969	45.2149	83.1152	67.2181	64.1313	59.9765	79.6497	50.8448	69.7177	61.3976	138.647	65.8147
ILWL464	247.809	152.327	137.502	169.667	96.3415	117.122	130.617	154.035	93.5583	72.282	109.502	59.5625	85.1551	76.7581	48.2243	42.2676	63.63	148.842	59.3915	83.8681	145.14	120.312	144.994	51.8629	51.3465	54.9224	53.5581	78.4134	129.358	87.3308	49.4296	43.1662	154.595	63.1989	82.179	45.3946	33.5581	74.8386	89.3563	47.474	134.088	71.1651	54.8585	45.2988	109.012	143.876	119.412	63.4725	144.247
ILWL468	157.896	250.938	133.505	271.465	214.316	235.145	248.655	259.114	180.59	170.701	222.148	173.945	201.74	192.29	157.223	130.828	163.716	266.971	171.035	198.279	263.484	238.332	263.306	170.179	161.426	158.088	145.384	196.54	248.109	204.928	161.142	130.429	272.351	179.133	198.989	100.172	142.37	191.788	206.362	156.255	251.321	184.079	168.572	153.617	226.468	261.928	236.128	112.727	262.72
ILWL470	184.992	212.672	120.129	232.541	172.817	193.496	207.07	219.531	146.259	132.043	181.22	133.593	160.498	151.359	116.379	92.35	124.117	225.313	129.511	156.613	221.814	196.776	221.608	128.22	120.698	117.859	106.346	155.012	206.197	162.899	119.765	92.1819	230.587	137.553	157.22	62.4679	101.521	149.848	164.965	115.045	209.572	142.957	127.519	112.871	184.743	219.92	194.429	79.6438	220.779
ILWL472	346.406	110.797	213.178	114.503	27.3648	18.4458	27.3018	95.7383	111.934	91.0985	54.3435	66.2059	34.3403	44.0312	79.7241	110.339	88.977	42.728	68.3378	47.6017	41.0341	21.6521	38.3347	59.2455	75.2626	86.8088	104.602	40.2753	31.4625	37.3032	79.1486	111.762	55.1679	61.0775	45.418	142.237	90.8546	47.8997	40.1513	85.2104	43.3099	58.6157	66.3606	83.5021	34.5482	43.5551	35.0041	143.644	43.2657
EC-718308	283.041	128.145	160.748	142.507	57.5297	77.7783	91.1881	125.153	84.1477	59.8903	76.5955	29.6592	48.0543	41.4832	33.7528	54.1939	52.9243	109.301	35.681	50.8309	105.637	80.9284	105.35	13.7629	32.9706	44.8088	56.0622	39.9356	89.9761	50.0294	30.9982	55.5819	115.879	31.3533	46.3029	76.0979	31.9249	39.2046	52.4365	35.0736	96.1089	42.03	28.4158	34.0798	71.2286	105.041	81.9697	86.5106	105.114
EC-718309	193.014	207.931	123.73	227.551	164.375	185.178	198.72	213.965	139.985	126.135	174.545	124.993	151.984	142.742	108.885	84.7968	117.867	217.039	122.754	149.657	213.49	188.435	213.357	120.204	112.858	111.277	100.736	146.8	198.323	155.554	112.948	84.6934	222.981	130.308	150.049	58.5058	93.4879	142.679	157.272	108.545	202.152	135.555	119.439	105.407	177.335	212.356	187.08	75.4558	213.022
EC-718310	329.512	118.281	200.247	126.072	11.3787	32.5512	44.8632	107.443	98.5145	82.0421	59.2589	39.8463	25.1253	31.4828	66.4409	94.512	79.4316	62.7323	58.8875	46.2956	57.667	34.9356	58.7104	38.8819	61.9834	75.7006	92.1799	14.9447	43.8794	28.8031	60.6488	95.5628	73.4365	41.8944	33.5632	122.02	72.9887	34.8994	29.2643	67.93	57.5188	50.1644	51.1474	68.9746	37.0328	63.233	49.3948	128.894	60.8042
EC-718311	281.883	133.152	161.8	147.464	59.4049	80.2216	93.8143	129.97	88.4969	64.721	82.3957	30.9678	49.7977	42.8157	35.1194	52.7403	55.4372	112.05	40.3303	55.8364	108.128	83.6016	108.249	16.8098	34.2251	47.2425	58.2128	42.7756	93.5853	54.5795	34.1528	54.2482	119.871	36.7698	52.1582	75.6033	30.7338	44.9336	57.3722	37.9786	100.393	45.6945	29.9266	35.2789	76.2205	108.932	86.6638	85.9868	108.796
EC-718312	257.815	149.296	145.896	165.921	86.7219	107.836	121.368	149.645	92.7356	72.2992	104.233	50.2433	76.5833	68.3667	45.6722	45.1525	63.0793	139.616	56.4998	78.4881	135.718	111.028	135.882	43.409	47.6898	54.4116	56.7647	69.2053	120.697	79.8947	45.0082	46.332	146.475	56.8369	75.4936	53.9447	31.68	68.2043	81.8018	44.6421	126.34	66.1313	49.1407	43.2399	101.511	135.818	112.339	71.4548	135.897
EC-718693	151.861	272.326	149.15	292.833	233.861	254.728	268.159	280.364	199.6	190.851	243.105	193.5	220.684	211.125	176.5	148.78	183.622	286.612	191.195	218.823	283.136	257.921	282.967	190.14	180.317	177.903	165.203	216.606	268.398	225.702	182.266	148.228	292.982	200.026	219.932	121.77	161.244	212.722	226.925	177.486	272.12	203.96	187.703	173.056	247.271	282.506	256.748	130.006	283.113
EC-718694	127.256	365.988	214.656	387.302	337.895	358.917	372.335	376.889	293.624	288.634	343.156	296.619	324.841	315.187	278.947	250.553	283.114	390.734	292.846	320.533	387.218	362.017	387.041	293.992	283.2	278.499	263.903	320.038	371.568	328.132	283.465	249.777	395.432	301.757	321.715	219.394	264.563	314.777	329.118	278.2	374.19	305.916	290.935	275.268	349.296	385.236	358.795	226.077	386.039
EC-718446	202.674	213.975	137.689	233.097	162.029	182.832	196.237	218.336	142.537	130.227	177.189	122.784	149.168	139.71	109.084	83.928	120.927	214.715	124.915	151.412	211.181	186.07	211.171	119.315	111.994	113.73	105.301	145.63	197.719	156.611	115.864	83.9128	223.087	132.194	151.811	68.1051	92.4601	144.431	157.804	112.268	202.891	136.329	118.254	105.998	178.319	212.522	187.938	80.0073	212.752
ILWL90	166.166	248.854	138.37	269.292	207.745	229.275	242.493	256.256	170.209	164.88	216.818	165.975	195.126	185.469	151.795	124.36	159.416	261.028	166.67	193.862	257.202	232.144	257.239	164.987	155.372	153.534	141.039	189.997	241.816	199.827	156.591	123.48	266.563	173.293	193.395	97.279	136.101	186.789	199.826	152.352	245.802	178.451	162.071	147.996	220.49	256.655	230.754	107.738	256.708
ILWL93	235.283	176.464	140.379	194.597	117.385	139.453	152.511	178.918	101.175	91.8856	133.365	75.7274	106.575	97.4574	71.33	54.1908	86.0042	171.045	85.7089	109.96	166.849	142.109	167.233	76.4815	73.336	77.9957	73.2101	99.8624	151.823	112.11	73.7129	53.7154	177.859	86.4809	106.148	47.9142	53.8028	99.9534	111.525	72.1575	157.797	95.0785	76.8297	67.79	132.209	168.066	143.792	67.0462	167.38
ILWL97	388.823	122.116	252.277	119.334	62.6196	47.5504	37.4851	102.974	132.236	128.121	76.752	100.432	79.7052	88.4429	127.148	156.497	132.076	30.2312	115.993	90.7408	26.6352	43.0339	29.0217	105.869	122.808	132.144	148.999	77.0381	31.2095	75.4306	119.457	157.491	31.5601	98.5877	80.6851	183.898	137.824	87.9013	70.3122	126.55	42.0857	101.968	112.363	129.684	54.685	37.0522	54.9869	189.002	28.6287
ILWL120	384.791	128.541	250.478	126.828	51.4636	36.488	25.788	109.994	133.27	126.248	79.178	92.6331	69.2316	78.8472	119.8	148.645	127.742	22.7961	109.996	86.8729	14.3713	32.1754	20.7797	97.0393	114.74	126.749	143.99	69.2023	26.2551	70.5475	114.371	149.525	40.4203	93.6057	76.9633	178.54	129.076	83.1776	66.9821	121.613	45.9687	96.528	104.17	122.7	53.6435	39.748	55.8467	182.65	30.518
ILWL121	161.181	259.655	143.868	280.308	219.699	241.164	254.411	267.563	182.142	177.311	228.816	177.77	207.596	198.013	164.68	137.7	171.975	272.873	179.127	206.067	269.093	244.01	269.162	176.845	168.352	166.212	153.666	201.908	253.745	211.671	168.238	136.916	278.502	185.153	205.193	108.074	148.997	198.562	211.856	163.924	257.688	191.174	174.942	160.891	232.347	268.618	242.879	120.76	268.775
ILWL149	284.138	137.28	166.18	151.66	58.6067	80.027	93.2376	133.667	84.3653	67.0706	84.2789	23.1974	49.659	41.8948	39.9571	54.911	60.6637	111.657	46.814	60.2839	107.706	82.833	107.887	20.7403	37.7794	52.5769	63.2859	41.8071	93.8422	57.4014	38.9142	56.2149	120.453	38.9387	53.9429	77.9404	33.8065	47.9176	56.9798	43.227	101.483	49.5204	32.6561	39.6983	76.8812	110.31	88.2914	89.1862	109.567
ILWL194	344.472	112.416	211.922	117.234	18.0396	15.1548	27.1851	98.4836	109.545	91.9101	56.0971	58.4055	33.8016	42.6286	80.0461	109.928	89.8077	43.8601	69.8529	49.6753	40.4329	18.2172	39.9852	54.9917	75.8035	87.4901	105.108	31.8773	29.8416	33.8106	74.8535	111.422	56.668	56.288	41.6678	138.152	89.5269	44.2138	34.8684	81.3583	43.4841	59.5553	65.8891	83.121	31.6457	45.8463	38.077	143.971	44.7542
ILWL195	278.997	137.684	161.486	152.621	63.4155	84.414	97.7887	134.812	84.6952	65.8972	86.342	28.0321	53.878	45.7704	38.3921	51.6559	58.6491	116.112	46.1787	61.6239	112.345	87.3724	112.368	22.886	37.307	50.3631	60.1754	46.1845	98.2501	60.2369	37.3348	53.207	124.3	40.6046	56.6326	72.9767	31.3598	50.0292	60.4668	40.7769	105.015	50.5255	33.6965	37.71	80.4759	114.044	91.4044	85.1556	113.692
ILWL196	267.662	151.673	159.063	166.169	84.7228	103.301	115.265	148.176	83.1169	61.6243	99.3127	57.912	64.1683	54.5342	27.7323	21.9065	53.2453	133.676	48.3333	73.1092	130.466	106.356	129.282	51.5216	23.5877	43.2418	48.7659	71.9041	117.372	82.3615	61.042	21.3835	141.519	65.0384	79.135	79.4211	18.0022	73.7027	81.091	62.0592	123.488	53.1944	31.004	28.4101	100.786	131.357	106.131	59.9294	130.416
ILWL197	244.096	165.397	142.046	182.87	104.752	125.672	139.165	166.717	101.909	84.7768	122.387	66.5325	93.3678	84.3306	58.8747	46.7675	75.1101	157.515	72.9955	96.5622	153.836	128.865	153.903	62.0616	61.1031	66.6696	65.3796	87.8194	139.865	99.3922	62.2779	47.885	165.386	76.0098	94.9855	49.3009	42.5468	87.6377	100.543	60.5234	145.406	82.7558	64.6655	56.0422	120.855	154.869	131.079	67.1869	154.986
ILWL198	243.444	165.432	141.455	182.955	104.911	126.313	139.696	166.9	99.037	83.3457	121.939	65.8111	93.5594	84.523	58.5172	45.6064	74.6386	158.14	72.7715	96.6841	154.221	129.375	154.417	62.6463	60.6709	66.2105	64.1891	87.6967	139.732	99.3629	61.9257	46.2022	165.458	75.205	94.5134	48.1513	41.6557	87.5119	100.043	60.3735	145.404	82.326	64.1104	55.4176	120.506	155.099	131.099	65.3831	154.932
ILWL199	382.402	119.886	246.091	117.492	52.4387	32.5144	21.3662	100.815	135.218	123.453	73.5188	94.9929	68.6739	78.5059	117.641	147.835	124.196	13.5248	106.058	81.2111	10.9916	29.2673	11.2287	95.2617	113.143	123.557	141.134	69.4539	23.6649	66.7486	112.133	149.092	32.6837	92.2607	74.1225	176.969	128.4	79.6183	65.5412	118.749	38.7447	93.6799	103.289	120.84	50.0469	29.3884	48.4884	181.178	24.0469
ILWL282	321.467	124.57	195.537	133.963	18.9095	40.6269	53.1922	114.824	93.0081	78.0529	64.4403	28.8959	21.1007	23.2889	59.086	85.151	75.1857	71.7309	55.1186	48.0622	67.4459	42.8756	67.822	30.5216	53.9584	70.2138	86.4793	13.0434	55.4607	34.8551	56.3782	86.2846	84.0304	39.6239	36.7809	114.319	63.6159	36.1146	32.5571	63.4461	67.8945	47.4524	43.3034	61.5063	46.091	74.2361	57.8084	120.828	72.0824
ILWL305	283.802	140.082	166.825	154.296	59.8074	81.7432	94.9642	136.473	87.5537	69.6622	87.3903	25.7645	50.883	43.4573	40.6239	54.3241	62.1452	113.477	48.2754	62.7044	109.22	84.6692	109.711	22.3424	38.3196	53.861	64.0514	43.8203	95.5461	59.4785	40.6394	55.3731	122.783	41.2476	56.5425	78.0078	32.786	50.5143	59.9295	44.9484	103.898	51.4209	33.359	40.4324	79.3992	112.438	90.9419	88.6239	111.44
ILWL307	306.777	129.037	183.524	140.025	35.2987	56.0576	69.5938	121.492	97.2596	74.9247	73.806	29.7764	28.5944	25.833	47.0729	71.3389	66.1093	87.9088	46.8182	49.0763	83.6383	59.7802	84.2643	17.7847	42.8709	59.854	75.3884	25.2223	71.925	41.5109	47.2316	72.78	99.6367	38.3778	44.0887	100.786	49.2493	38.8711	45.1038	53.3126	82.1471	43.7603	33.5577	49.4711	60.5947	88.4245	70.3209	107.123	87.4496
ILWL308	164.973	436.284	280.082	457.835	408.412	429.6	442.88	447.628	360.809	358.78	413.946	366.447	395.286	385.497	349.848	320.786	354.029	461.361	364.158	391.876	457.818	432.548	457.674	365.018	353.863	349.512	334.766	390.67	442.391	399.386	354.717	319.875	466.387	372.723	392.73	290.53	335.243	386.009	399.789	349.579	445.246	376.884	361.584	346.159	420.181	456.465	429.879	295.935	457.036
ILWL480	183.714	225.178	131.279	245.289	180.926	202.327	215.536	231.56	146.824	140.402	190.83	139.118	168.489	158.846	126.104	99.8319	134.895	234.039	140.946	167.727	230.3	205.16	230.261	138.148	129.534	128.545	117.192	163.127	215.029	173.265	130.609	99.138	239.83	146.886	166.86	74.1228	110.17	160.231	173.117	126.624	219.179	152.521	135.898	122.321	193.83	229.931	204.199	87.7244	229.993
EC-718672	248.427	163.354	144.729	180.266	100.52	120.988	134.54	163.999	104.132	83.4223	119.582	64.7475	88.2966	79.5496	54.0217	43.6204	72.2399	152.941	68.1395	92.3001	149.44	124.399	149.333	57.0451	55.8793	63.1615	63.1037	84.4582	135.94	95.6083	60.3471	44.9067	161.773	73.5725	91.8836	53.3637	37.1957	84.1844	97.8324	58.7306	141.937	78.7981	59.8889	51.9425	117.631	150.787	127.319	66.8848	151.04
EC-718673	334.823	122.097	206.762	128.59	14.6126	25.4344	37.7865	109.077	103.857	85.1557	62.0966	48.8434	15.0887	25.1352	66.7894	95.0608	81.2002	56.4116	60.5913	47.4517	53.0781	28.9125	52.299	44.3905	61.0719	77.2683	95.1209	27.106	44.9023	37.1064	69.5996	96.3588	72.1291	52.6439	43.5862	129.874	74.9316	44.012	37.4013	76.1505	58.6945	50.6065	51.2519	70.4663	43.1081	61.5002	48.5241	130.815	59.5231
ILWL06	345.848	90.4471	208.562	95.2932	54.2783	51.5804	53.8869	76.1518	91.0092	86.1534	37.0952	75.438	64.3602	68.5837	95.0539	124.129	93.8445	60.3748	82.4738	57.1488	57.788	50.0091	56.6858	80.3172	93.1776	95.5578	110.794	54.013	39.1498	46.9902	83.4373	125.507	43.9474	64.4336	47.8164	145.422	108.374	55.4033	36.8342	89.6115	31.2215	68.1777	83.7273	96.2226	27.8303	43.2008	29.4712	152.252	42.4566
ILWL08	378.535	91.2738	236.127	86.6547	75.6357	63.415	58.388	72.2344	126.24	118.199	59.4876	108.622	90.4638	97.9771	126.831	157.861	124.108	52.8454	111.512	82.8876	50.8825	61.0735	51.0459	110.223	124.896	126.751	142.062	82.831	38.7498	71.1458	114.119	159.11	15.5435	94.9627	75.5362	178.547	140.977	83.265	68.0396	120.136	25.9228	98.0799	115.328	128.634	48.1018	26.7907	43.0483	185.339	26.0306
ILWL09	324.472	101.586	192.75	110.89	48.0851	57.6009	64.7518	91.1686	71.7555	69.3132	43.5653	54.8514	52.1208	52.4395	74.7304	100.668	75.638	77.1589	67.2975	49.9777	72.5419	57.6047	72.991	64.1234	72.8554	76.5446	91.213	40.0661	54.3403	42.0344	65.4344	101.818	69.1539	48.0995	40.6595	124.259	86.3499	46.1541	27.8613	72.1581	53.4081	50.9602	62.9083	74.9402	37.828	65.2888	44.4666	129.415	62.9719
ILWL16	384.898	116.19	247.375	113.192	58.9403	41.7014	31.7414	96.7366	132.308	124.044	71.4914	98.8094	75.427	84.5974	122.384	152.591	126.904	23.7397	110.266	84.3059	21.0513	37.8986	22.0244	101.328	118.294	127.052	144.154	73.6624	24.9553	69.792	115.078	153.744	25.0493	94.6756	76.0364	180.171	133.806	82.7405	66.6958	121.889	35.2882	96.9108	108.174	125.17	49.7355	27.9183	48.0343	184.844	20.5173
ILWL13	262.129	116.246	136.177	134.642	91.3482	108.583	119.536	119.021	35.8091	34.6739	73.5013	59.2439	83.4385	76.1499	55.4568	65.3912	51.3193	135.2	54.2482	65.8215	131.838	109.877	130.715	63.8898	59.3887	50.0229	49.919	70.4209	110.527	71.7853	44.3573	65.8921	127.928	47.4498	60.988	67.4837	60.2446	59.4611	65.0367	44.9142	107.773	56.5131	58.4096	51.3262	83.7181	121.47	92.9477	79.3654	121.813
ILWL15	267.048	102.623	135.239	121.238	83.6896	99.5761	111.086	105.529	49.9501	32.3707	62.5914	56.8189	77.6807	71.2699	52.2173	68.6981	44.3421	126.135	46.075	53.6473	123.057	101.43	121.909	56.2357	57.3536	44.6014	48.2227	62.2453	101.485	59.8008	31.9219	70.2464	117.663	37.0474	49.9915	68.1628	60.6563	47.1023	55.7965	32.0974	96.7203	48.4921	55.3269	48.5248	73.6178	110.433	82.0169	84.7875	112.085
ILWL17	379.138	105.266	240.083	102.641	62.7941	46.0902	38.6738	86.0248	126.19	117.794	62.5916	99.0366	77.4305	85.6251	120.264	150.942	122.375	32.6065	106.769	79.4619	33.2933	42.704	30.7076	100.715	116.922	123.193	139.902	73.9728	29.0936	67.0338	111.633	152.321	19.3552	91.7149	72.0922	176.194	132.965	79.0036	63.1358	117.905	28.5875	93.8561	107.385	122.824	45.1584	24.3413	41.066	181.699	22.2623
ILWL18	308.919	80.4314	171.471	92.0248	53.5272	60.2274	70.0527	72.5862	76.4236	48.7352	20.9476	60.5575	50.078	50.1299	57.3752	88.3751	52.3514	82.7987	40.7491	15.6032	80.7015	62.6017	78.44	52.4617	58.2763	54.3567	69.8799	41.7532	59.7405	25.5966	48.7937	90.2673	72.3991	35.4541	24.5712	110.23	74.4406	25.7077	25.3272	53.18	52.0353	29.9363	51.572	58.5706	34.0291	63.6619	33.4503	113.6	66.7031
ILWL19	173.72	186.362	87.3678	207.493	168.414	188.064	201.122	195.342	113.386	103.813	160.113	128.775	154.868	145.097	104.624	81.892	102.699	218.611	115.42	141.298	215.418	190.903	214.394	125.274	110.862	99.5065	83.7094	148.009	196.493	151.805	107.211	81.7934	216.337	125.144	144.154	46.2126	96.5039	138.087	151.239	101.653	195.057	127.235	118.18	99.8378	171.082	207.35	178.597	56.2646	208.734
ILWL22	342.022	121.863	212.501	127.304	11.0901	18.7992	31.8675	108.36	112.236	94.0241	65.3388	53.8374	27.3336	36.5296	76.4812	104.893	89.3946	49.7782	69.1918	53.3905	45.4646	22.9544	46.2805	50.2124	71.5334	86.0881	103.839	29.5685	38.9379	38.1829	73.9625	106.311	67.1356	56.9218	46.4596	135.598	84.0512	47.3077	40.4665	80.7043	54.688	59.3417	61.3712	79.7679	42.0033	56.3299	48.7634	140.39	54.2375
ILWL23	384.309	128.141	249.662	125.911	50.0318	32.9729	23.4231	109.229	140.675	128.255	81.73	94.6109	67.9101	78.1126	118.569	147.934	126.61	19.45	108.612	85.4384	8.226	30.9276	18.6978	95.3146	113.795	125.665	143.42	69.2903	27.933	69.3527	113.438	149.066	42.4398	94.2023	78.1174	178.19	128.144	82.9412	69.6285	120.476	47.1222	95.7472	103.404	121.768	56.3554	38.23	56.5743	182.183	31.099
ILWL24	340.519	130.11	213.961	136.603	9.3979	28.958	39.0738	117.542	105.34	94.2956	70.4488	44.519	28.0755	35.2335	76.922	102.744	91.8798	57.1519	72.511	60.2779	51.4156	29.9644	53.5227	49.8748	71.1918	87.8694	104.598	26.0836	44.086	43.4925	74.052	103.638	74.2363	55.7236	48.2043	133.339	81.6543	50.2984	40.2865	81.496	62.0683	61.9815	60.1789	79.5533	45.9377	65.595	57.0175	138.939	61.1881
ILWL25	335.31	125.881	208.277	133.681	20.7834	38.7284	47.1955	114.726	91.2608	86.829	64.053	37.7527	34.5522	38.7522	75.8373	100.982	88.935	64.1344	70.8079	58.8776	58.4541	37.8958	60.0808	50.3932	70.6388	85.2885	100.714	23.3201	45.6182	41.5014	69.615	101.555	74.5944	49.1367	41.6157	128.119	80.497	46.0426	32.1497	77.401	61.0182	59.9908	59.411	77.5801	40.6824	67.8882	55.5416	135.539	63.0164
ILWL27	327.692	121.561	200.15	129.902	12.7782	35.4378	47.2911	110.803	93.7862	80.4995	60.9997	34.7623	22.7682	27.5268	64.7438	91.5882	78.6637	65.4926	59.4019	48.4659	60.38	37.2424	61.4284	38.5401	59.7773	74.706	91.1412	13.0758	47.5341	32.8199	60.6181	92.5774	76.4985	41.9295	35.846	120.584	70.6157	37.2709	29.0021	68.0105	60.9177	49.3216	48.6154	67.0252	40.1292	67.1729	52.2778	126.667	64.1928
ILWL28	168.282	263.17	152.037	283.379	218.269	239.397	252.664	269.933	186.454	179.569	230.602	177.481	205.307	195.661	163.345	135.496	172.328	271.212	179.036	206.236	267.589	242.447	267.618	175.722	166.532	166.127	154.681	201.472	253.612	212.132	169.652	134.895	278.768	186.515	206.484	112.18	147.189	199.45	212.626	165.453	258.284	190.745	173.389	159.935	233.345	268.503	243.223	120.765	268.652
ILWL30	306.38	141.772	188.437	153.495	41.7922	63.4151	75.6263	134.51	91.597	79.4894	83.1945	17.5971	35.0702	29.7412	52.7685	70.8866	74.859	94.3687	57.254	62.3358	90.222	65.5762	90.7407	25.9133	46.9841	67.4207	81.0689	31.9194	79.9195	54.2156	55.0544	71.7539	108.586	45.682	53.0455	100.908	49.2308	49.7219	51.559	61.104	92.1231	54.2618	38.4855	54.3887	69.0464	98.9786	80.9786	107.999	96.6994
ILWL31	292.007	148.408	178.132	161.942	58.021	79.4816	92.0415	143.444	91.1625	78.9532	92.8536	22.5209	49.8927	42.6611	50.1869	61.8874	73.3227	110.679	58.4391	70.0411	106.741	81.8274	107.128	28.2441	45.8932	64.8393	75.605	45.0338	95.5356	64.6987	52.3767	62.7744	123.651	49.5861	61.9222	87.7184	41.1081	57.0877	63.0305	57.0414	106.118	59.755	40.5078	50.6954	81.9782	113.894	94.1145	97.7852	112.228
ILWL33	268.894	144.958	154.946	160.76	75.6298	96.5023	110.08	143.512	91.4053	71.6843	97.3998	40.2187	66.0932	57.8179	43.1637	49.0117	62.0938	128.282	53.4233	71.7052	124.473	99.7247	124.704	34.1394	43.8043	53.7514	60.4826	58.704	110.683	71.5083	41.8766	50.7846	136.451	50.7789	68.2184	64.4396	32.2944	60.9447	72.9171	43.2797	116.887	59.9292	42.8814	41.5631	92.755	125.947	103.334	79.9609	125.927
ILWL34	329.204	127.434	203.745	135.537	15.1604	35.4722	47.6022	115.897	99.4727	85.5553	68.2298	37.479	21.2052	25.2769	65.9672	91.5496	81.238	65.8159	63.3032	53.5063	61.0153	38.0274	62.2094	40.5585	60.583	77.089	94.2114	20.3853	52.5893	40.2815	64.862	92.8477	80.3367	49.04	45.0929	123.171	71.2868	44.9332	37.6353	71.9584	66.1297	52.5019	49.6903	68.4881	48.5672	70.9799	57.6994	128.01	68.1669
ILWL37	201.193	208.183	132.115	227.741	158.977	180.449	193.603	213.263	129.681	122.294	170.805	117.24	146.671	137.098	105.831	80.7991	116.562	212.15	120.909	147.354	208.378	183.235	208.365	116.523	108.843	109.558	99.7535	141.391	193.365	152.198	110.633	80.1407	218.572	126.076	145.932	59.9428	89.2125	139.368	151.927	107.205	198.138	132.108	114.728	102.166	172.688	208.674	183.284	75.0006	208.532
ILWL38	295.884	135.625	177.144	148.314	48.4699	69.9044	81.9973	129.46	77.2577	63.6039	76.3704	19.9462	35.0791	26.7923	38.1079	57.074	60.6196	100.787	44.5416	54.6703	96.65	72.121	96.5266	25.1041	31.8733	52.8588	65.8498	34.5795	83.1257	52.3872	47.3006	57.5135	110.162	38.6532	49.0098	92.2767	36.5229	45.687	48.3052	52.9777	92.4862	41.5614	23.159	39.4043	68.1681	100.676	78.5548	93.4418	98.5921
ILWL111	163.818	266.046	152.107	286.593	223.106	244.504	257.568	273.338	184.388	181.344	233.411	180.917	210.263	200.454	168.015	139.892	176.277	276.146	183.526	210.59	272.458	247.258	272.425	180.918	171.166	170.28	158.112	205.736	257.769	216.479	173.733	139.019	282.655	190.005	209.982	114.925	151.99	203.434	215.846	169.571	262.118	194.872	177.921	164.32	236.782	272.872	247.066	123.761	272.809
ILWL191	164.515	250.393	139.309	270.65	208.661	229.68	242.846	257.265	170.933	163.999	217.422	167.624	194.448	184.631	149.945	121.038	158.127	261.49	165.531	193.63	258.023	232.647	257.632	165.418	153.313	151.973	139.323	191.369	243.08	201.035	158.323	120.124	267.709	174.975	194.804	99.856	134.422	188.028	201.142	153.963	247.101	177.71	160.848	146.486	221.91	257.592	231.226	103.005	257.765
ILWL315	383.545	119.393	246.749	116.673	53.5892	37.1304	27.5258	100.449	134.895	124.472	73.9886	95.8805	71.4481	81.2686	119.674	149.777	125.463	21.5722	108.026	83.0839	13.8097	34.0072	19.6463	97.5151	115.394	125.206	142.408	70.085	20.7922	67.1602	112.585	150.831	30.6538	92.3476	74.5247	177.883	130.32	80.6826	65.8817	119.555	37.4666	94.9674	105.026	122.571	49.6146	29.1717	49.6403	182.599	20.3482
ILWL460	185.247	233.706	139.551	253.809	186.909	208.769	221.75	239.926	150.688	147.948	198.099	144.233	174.935	165.307	134.114	107.617	143.538	240.331	149.27	175.767	236.345	211.358	236.532	145.326	137.082	137.111	125.9	169.285	221.163	180.399	138.312	106.557	246.45	153.67	173.684	83.1145	117.546	167.511	179.512	134.825	226.011	160.179	142.974	130.281	200.348	236.91	211.403	96.2118	236.47
ILWL474	358.186	122.517	226.588	125.179	22.7907	12.3385	17.9451	106.802	119.672	105.494	67.7545	67.456	41.5871	51.423	92.4252	121.196	103.186	34.2123	83.8734	64.0966	28.2439	12.866	30.6517	67.5415	87.3895	100.907	118.591	42.7053	26.1091	47.5331	88.4672	122.406	54.0511	69.4826	55.563	151.564	100.786	59.0135	47.1971	95.4221	46.3862	72.1549	76.9865	95.5676	41.2022	45.0104	46.5037	156.227	40.7024
EC-718264	363.533	128.198	233.344	130.871	30.3243	21.8573	21.1693	111.79	116.902	109.545	71.8123	69.1826	47.4999	55.8357	98.8904	126.253	109.634	34.3446	91.9828	72.3264	28.772	18.3349	31.1469	75.0465	93.453	107.504	125.094	48.083	30.8224	56.2798	95.2372	127.376	54.58	75.6475	62.2709	157.307	106.764	66.8743	51.0098	102.544	50.054	78.5994	82.7593	101.688	46.2294	49.657	51.6245	161.75	43.6172
EC-718265	265.138	147.763	153.41	163.738	78.7184	100.606	113.749	146.315	82.5979	66.5591	98.1623	40.4319	66.9435	57.8042	38.8207	39.7213	58.9151	132.297	52.7495	73.527	128.05	103.5	128.354	39.5411	38.8847	50.2039	55.1438	61.4667	113.428	74.9001	44.3319	40.4746	139.317	52.0419	70.5231	62.856	24.9668	64.3501	74.1937	46.0868	119.826	58.056	38.7306	36.3387	95.0873	129.365	105.521	71.4825	128.506
EC-718266	344.089	105.954	209.931	110.322	24.506	17.7416	29.4053	91.1877	112.3	91.5656	53.1294	63.8426	37.7313	45.9409	80.7444	111.481	87.8419	43.6372	69.6248	46.7439	40.6272	22.3938	40.1708	57.842	77.4384	86.631	104.752	35.6359	30.307	32.4948	74.5989	113.338	52.6507	57.7716	42.9814	139.036	92.0934	44.7036	36.6205	80.831	38.9175	58.4035	67.7511	83.7791	31.6837	40.9656	33.1815	144.684	41.7885
EC-718267	339.937	130.588	213.427	136.934	12.2539	25.5347	37.5005	117.839	111.756	95.7849	72.5334	48.1376	25.3153	33.3403	75.2117	101.63	91.175	55.9235	70.4483	58.6715	51.9104	28.3799	52.6635	46.8759	69.465	86.6959	104.044	29.3022	47.367	44.0136	74.3686	102.915	76.4073	57.9701	50.2902	133.232	80.2377	50.49	44.5732	81.1594	64.3043	61.883	59.4335	78.511	49.469	66.2802	57.9885	138.327	63.617
EC-718270	231.708	197.878	151.61	216.399	136.023	158.376	170.622	200.449	107.491	110.412	153.113	91.8098	125.684	116.298	94.0763	73.7108	108.562	189.154	109.412	132.631	184.827	160.281	185.341	99.0499	94.9011	100.934	95.1679	119.127	170.46	133.728	97.2196	72.3956	196.733	107.573	126.664	65.9317	76.2948	121.762	130.319	96.3005	177.413	116.859	97.9577	90.4545	151.426	188.105	163.99	81.7362	186.471
EC-718271	382.413	127.667	248.171	126.153	47.8478	29.0639	17.2669	108.999	136.075	125.286	78.7899	91.1989	65.1897	75.176	116.466	145.733	125.056	14.0375	106.501	83.4145	4.71075	25.5056	12.1695	92.7847	111.443	123.768	141.514	66.8351	26.2034	67.7	111.804	146.886	41.705	91.9943	75.3217	176.073	125.878	80.4389	66.3153	118.765	45.8325	93.9892	101.241	119.711	53.3251	37.9934	54.1471	180.237	31.4023
EC-718272	177.499	251.959	149.107	272.073	204.493	225.893	238.961	258.207	170.988	166.458	217.139	162.758	191.717	182.02	150.693	122.986	160.547	257.585	166.527	193.535	253.879	228.692	253.909	162.505	153.522	154.025	142.888	187.57	239.696	198.876	156.926	122.149	265.102	172.837	192.741	100.94	134.021	186.102	198.531	153.114	244.758	177.813	160.042	147.198	219.418	255.166	229.823	110.237	254.969
EC-718273	154.561	292.859	169.159	313.574	251.035	272.593	285.513	300.745	208.705	207.552	260.861	208.597	237.858	228.051	195.255	166.264	203.239	304.194	210.874	238.404	300.45	275.247	300.402	209.066	198.254	197.355	184.405	233.796	285.644	244.581	201.818	165.083	310.725	217.831	237.789	141.97	179.135	231.449	243.669	197.618	290.188	222.357	205.261	191.599	264.615	301.024	275	147.752	300.763
EC-718275	360.539	135.564	233.042	138.738	28.5398	27.0496	27.4947	119.702	113.999	107.021	75.3819	65.6268	40.5038	49.4198	93.5163	119.499	107.131	42.8363	88.3754	72.534	37.0725	24.4124	38.8526	71.9663	86.905	103.954	121.062	47.4064	37.4611	58.3721	94.9274	120.074	64.3172	74.8852	63.2842	155.163	100.037	67.744	52.6499	102.336	58.8741	75.49	76.4344	96.6773	50.9623	58.5053	57.0995	155.522	51.3195
ILWL27	382.793	112.207	244.722	109.143	58.9846	40.0377	30.7677	92.5583	133.06	122.63	69.2653	99.0644	74.7984	83.8049	120.918	151.54	124.805	21.8145	108.373	81.6448	21.7629	36.9183	20.5982	99.9407	117.116	125.142	142.499	73.2202	26.1473	68.1098	113.466	152.955	22.3847	93.7996	74.892	178.593	132.94	80.9612	65.8205	119.898	32.421	95.2739	107.328	123.766	48.7658	23.5761	44.9547	183.677	19.8349
ILWL28	388.383	118.276	250.446	114.487	61.5433	42.5387	31.5477	98.8241	138.102	127.849	74.9799	102.563	77.7283	87.3966	125.114	155.637	130.232	20.6891	112.413	86.6452	20.4092	38.909	19.6599	103.35	120.901	130.06	147.18	77.137	27.6912	72.4486	118.366	156.796	27.7734	98.0509	78.9137	183.402	136.372	85.2582	70.7997	124.951	38.6464	100.241	111.131	128.187	53.1057	28.7473	51.0442	187.99	23.232
ILWL29	289.248	102.065	158.913	117.035	57.1669	72.9831	84.9607	98.1929	62.1505	41.5539	49.9466	40.3331	50.8664	45.0832	43.0162	68.3253	43.2709	100.651	36.9588	35.2583	97.2189	75.3791	96.4859	39.1792	44.862	42.5258	56.4721	37.3316	78.2755	38.5609	30.4298	70.325	96.521	24.0888	33.4009	87.0791	55.0697	30.165	33.9253	35.8261	76.3619	28.7159	37.9019	41.7888	54.1255	88.4379	61.1154	95.3678	89.3261
ILWL30	277.169	84.5568	139.57	102.164	77.6236	90.3998	101.51	86.1084	60.2405	24.4827	44.8588	63.6142	71.2779	66.8878	49.424	73.5003	34.4325	115.383	35.1247	35.732	112.584	92.8289	111.049	55.968	55.0189	38.2879	46.29	58.4656	90.0763	47.6781	32.0744	75.3031	103.457	33.306	40.1912	81.3349	64.6051	37.3445	47.4825	32.7667	82.2378	35.5229	52.4011	47.2943	61.7645	95.4607	65.991	90.0003	98.255
ILWL36	307.961	119.886	182.093	131.793	38.0608	57.9962	69.0522	112.899	69.5993	61.6756	58.0872	20.0861	35.1499	31.9162	52.2485	76.3985	65.4502	86.6175	48.4835	45.9844	82.3543	58.9085	82.1914	32.5678	48.401	60.7794	74.5318	20.8472	65.26	37.1017	46.7388	76.9999	91.0745	28.2757	30.797	101.904	56.9184	32.137	27.6419	54.0717	73.163	41.4106	38.239	53.0408	47.295	83.2066	60.9761	108.967	80.9204
ILWL40	189.457	226.663	136.902	246.473	178.754	200.15	213.395	232.398	149.711	142.269	191.344	137.519	166.467	156.915	125.492	99.4312	135.54	231.924	140.794	167.396	228.147	203.074	228.255	136.333	128.609	128.888	118.538	161.537	213.634	172.37	130.379	98.8573	238.905	146.543	166.495	76.4379	108.978	159.681	172.575	126.642	218.447	152.151	134.761	121.925	193.265	228.823	203.681	90.0204	228.796
ILWL41	146.059	294.194	164.93	315.096	256.312	277.661	290.914	302.816	216.584	212.469	265.209	214.521	243.72	234.036	200.228	172.169	206.933	309.415	215.009	242.301	305.72	280.568	305.738	213.421	203.89	201.456	188.354	238.762	290.688	248.509	204.827	171.359	315.359	222.077	242.14	143.453	184.722	235.408	248.758	200.284	294.531	227.154	210.893	196.532	269.323	305.403	279.509	152.679	305.638
ILWL42	143.069	278.372	149.188	299.191	243.353	264.43	277.856	287.231	205.171	197.894	250.695	202.376	230.571	221.004	185.742	158.232	191.665	296.268	199.878	227.359	292.675	267.527	292.563	199.58	189.84	186.335	172.919	225.576	277.221	234.194	190.153	157.575	301.503	208.03	228.017	128.073	170.846	221.029	235.217	185.284	280.459	212.687	197.117	182.074	255.474	291.26	265.21	137.678	291.868
ILWL43	338.412	133.252	213.075	140.124	13.5157	29.7645	40.5453	121.016	107.152	94.1763	73.1698	43.5029	24.5555	31.7224	74.1607	99.5933	91.1908	59.2375	70.2817	60.1689	55.0711	31.2424	55.7202	45.8871	67.9131	86.2452	103.036	27.9863	49.403	45.5398	73.9588	100.593	79.2361	56.6464	49.7411	131.541	78.0354	50.5861	43.5001	80.9031	66.9648	61.8771	57.7688	77.2823	50.0793	69.821	60.2899	136.46	66.4239
ILWL44	203.71	206.904	133.166	226.335	156.593	178.302	191.442	211.792	128.233	120.966	169.065	114.897	144.501	135.012	104.1	79.3032	115.114	210.021	119.23	145.599	206.074	181.079	206.221	114.486	107.024	108.075	98.4633	139.072	191.017	150.066	108.677	78.5117	216.452	123.914	143.871	59.2563	87.256	137.394	149.832	105.469	196.047	130.201	112.659	100.412	170.561	206.568	181.35	74.3864	206.262
ILWL46	310.848	124.645	185.808	135.501	28.8679	50.7395	63.8215	116.774	90.1046	72.224	66.5571	23.3049	25.8434	24.1826	50.5847	75.9801	67.6755	82.23	47.8445	46.1069	77.8651	53.532	78.3387	20.3841	46.2029	62.036	77.5443	15.3081	64.4649	35.4448	47.1537	77.163	92.5021	33.1052	36.0528	103.562	53.9384	32.9188	35.4837	54.0307	74.9029	42.7604	35.8213	52.6077	51.7304	82.1664	63.5124	111.176	80.684
ILWL47	148.372	276.059	150.57	296.555	238.176	259.122	272.56	284.11	202.987	194.159	247.07	197.984	224.686	215.094	179.966	151.782	186.781	291.056	194.857	222.712	287.503	262.356	287.365	194.535	183.829	181.206	168.246	220.951	272.689	229.919	186.382	151.144	297.217	204.242	224.239	125.832	164.887	217.056	231.207	181.626	276.356	207.522	191.326	176.52	251.583	286.748	260.833	131.934	287.291
ILWL49	260.356	155.25	151.873	171.486	86.4586	108.335	121.675	154.631	93.3132	76.1429	107.994	48.9976	75.7791	67.2242	47.348	44.0017	66.8145	140.195	60.7344	82.3524	135.93	111.419	136.45	45.8387	48.0407	58.0282	60.939	69.9014	121.83	82.9812	50.4582	44.6968	148.357	60.4218	79.051	59.3793	31.2167	72.3245	83.9132	51.1862	128.759	68.2006	48.9036	45.0601	104.06	137.965	114.987	72.4947	137.306
ILWL50	139.603	350.49	206.194	371.734	318.889	339.918	353.359	360.959	279.813	274.713	326.795	277.657	307.217	297.761	263.498	236.327	268.632	371.584	277.145	303.993	367.999	342.978	368.104	275.495	267.651	263.724	250.153	301.247	352.911	310.02	265.731	235.769	377.209	283.926	303.841	202.776	248.509	296.822	311.239	260.706	356.098	290.081	274.715	259.813	331.234	367.019	341.518	214.982	367.798
ILWL51	285.708	586.934	422.87	608.591	564.24	585.222	598.602	599.621	515.304	513.02	568.589	522.575	551.044	541.289	504.936	475.859	508.057	617.004	518.857	546.594	613.578	588.288	613.382	520.477	509.171	503.964	488.798	546.503	598.122	554.588	509.562	475.018	621.77	528.106	548.044	444.743	490.753	541.175	555.48	504.139	600.458	531.979	517.162	501.307	575.638	611.706	585.028	449.53	612.603
ILWL52	278.818	144.434	164.215	159.33	66.3052	88.6447	101.6	141.559	83.8759	69.8387	91.8376	27.1689	57.3561	49.3649	42.9088	52.0156	63.9954	120.16	52.3783	68.4545	115.781	91.2195	116.324	29.77	41.0136	55.5663	63.708	49.6649	101.671	65.6279	42.8623	52.665	128.854	44.8727	61.4391	73.7125	32.2453	56.0026	64.6968	46.8269	109.903	55.9537	37.119	41.8309	84.8018	119.05	96.9164	85.224	117.729
ILWL53	347.32	123.672	218.288	128.208	18.9628	23.0016	29.877	108.794	104.623	92.528	62.4653	57.3585	27.9905	37.4906	79.4798	107.179	91.7944	47.4272	72.9404	56.6838	42.3065	23.2449	42.7578	59.689	73.5399	88.9363	106.302	35.582	34.5428	44.0918	81.0581	107.972	62.3236	61.4471	49.7237	142.499	87.9213	53.5771	39.9307	88.2781	52.2011	60.0247	63.0504	82.7213	40.3909	54.1788	45.8927	142.261	49.0266
ILWL54	147.449	280.929	153.788	301.816	244.34	265.905	279.189	289.785	204.38	199.983	252.347	202.488	232.256	222.709	188.521	161.165	194.742	297.643	202.718	229.839	293.767	268.791	293.916	201.389	192.404	189.382	176.042	226.441	278.12	235.725	191.809	160.285	302.731	209.07	229.19	130.09	173.151	222.57	236.099	187.271	281.755	214.965	199.176	184.673	256.465	292.819	266.952	141.546	293.036
ILWL55	215.887	149.519	103.87	169.703	127.401	147.113	159.627	156.006	70.9593	61.4894	116.68	89.3553	115.052	105.759	67.7594	53.8086	64.4675	176.744	76.6166	100.197	173.054	149.572	172.316	88.3164	74.0902	61.6575	47.8159	106.477	153.03	109.734	67.5248	53.6292	172.44	82.732	101.408	33.5718	63.4824	96.5369	107.53	63.4758	151.443	85.6054	79.2007	62.2053	127.407	164.205	135.353	44.416	164.895
ILWL55(2)	225.5	141.219	109.211	161.182	118.427	137.889	150.259	147.08	62.7492	52.8947	106.774	81.0169	106.72	97.6495	61.3261	51.9551	57.5782	167.188	68.8197	91.1354	163.511	140.227	162.753	80.5316	67.6316	54.9194	42.8535	97.3077	143.242	100.237	59.0025	52.0122	162.405	73.2843	91.6406	36.8764	58.6995	87.078	97.6086	55.4435	141.46	77.0611	71.8395	55.6987	117.402	154.371	125.528	49.1455	155.036
ILWL56	238.761	125.052	114.706	144.98	107.679	125.54	137.563	130.558	52.5652	39.4996	90.4505	73.3329	97.2652	88.8215	56.1426	56.6579	48.7253	153.719	59.001	77.4378	150.497	127.696	149.336	72.4513	62.668	47.5015	39.542	86.2449	129.657	86.8923	48.6027	57.5725	147.015	61.1937	77.7511	46.8252	58.6071	73.6607	83.6322	45.3004	126.115	65.9755	65.3976	50.8252	102.692	139.405	110.256	60.9588	140.661
ILWL57	330.641	122.648	203.349	130.547	11.2381	31.026	43.4679	110.83	97.8837	83.7243	62.7743	38.6983	21.2081	26.4812	66.8062	93.732	80.7022	61.7099	62.0242	49.8299	57.288	33.3639	57.9231	40.8695	61.7742	76.924	94.1969	17.6016	47.3769	35.518	64.0924	95.0735	75.0603	46.9648	40.3987	124.139	73.3405	41.127	32.7951	71.3179	60.5447	51.3625	50.8839	69.4194	42.4437	65.8018	51.9674	129.522	63.2793
ILWL58	687.141	1008.25	835.767	1029.66	1003.23	1023.72	1037.34	1023.76	946.335	943.02	999.803	962.16	989.31	979.465	939.698	911.096	938.666	1055.43	952.171	979.483	1052.18	1027.05	1051.65	958.433	944.896	936.095	919.584	984.491	1035.04	989.72	943.81	910.379	1056.19	963.455	983.083	877.979	927.769	976.195	991.215	937.672	1034.46	965.586	953.52	935.908	1010.73	1046.26	1018.5	880.343	1048.09
ILWL59	211.076	156.307	103.826	176.656	134.031	153.297	165.664	162.903	73.6519	67.1769	123.207	95.1099	120.851	111.28	73.5275	57.1638	71.4544	182.847	83.0252	107.003	179.596	155.611	178.422	94.4073	79.3362	68.1442	54.2513	113.38	160.027	117.167	75.8077	56.939	179.32	90.3953	108.487	37.9467	68.3883	103.66	114.359	71.6203	158.535	92.5555	85.2199	68.3602	134.342	171.208	142.063	45.0883	171.999
ILWL60	248.772	115.362	120.93	134.802	97.4069	114.861	126.878	119.85	50.8684	31.2485	79.0464	65.9431	87.857	79.9715	49.6099	56.809	40.6215	142.773	49.6945	66.0333	139.45	117.112	138.402	64.04	56.2903	40.1779	36.1873	75.9278	118.323	75.2728	38.4109	58.0471	135.401	50.241	66.4263	52.9977	55.1735	62.3847	72.4625	35.8856	114.388	55.4662	57.5909	44.5005	91.2426	127.684	98.6133	66.3608	129.055
ILWL63	296.933	75.6947	157.51	89.5481	64.7148	73.2652	84.9515	72.0076	92.3234	56.2058	42.7645	68.5462	63.515	62.3201	59.1875	88.3421	47.8093	96.9301	43.9921	27.0454	93.9989	77.3626	93.5201	54.5736	63.5928	52.3617	66.7924	50.8508	74.7336	34.3314	39.9058	91.1964	85.8451	39.3862	38.692	99.9863	75.9567	33.2618	43.6833	42.1338	64.9848	37.3562	58.0798	59.0599	52.0466	75.6494	51.2202	110.482	80.5119
ILWL64	189.825	218.911	130.437	238.7	173.208	194.486	207.883	224.882	145.712	135.821	184.674	132.603	161.056	151.641	119.127	93.8937	128.479	226.326	133.777	160.448	222.558	197.549	222.648	130.098	122.681	121.963	111.418	155.733	207.644	165.665	123.187	93.4821	232.662	139.961	159.938	68.5282	103.098	152.927	166.54	119.21	212.005	145.662	128.904	115.525	186.962	222.393	197.194	84.1255	222.624
ILWL65	282.27	88.9325	146.858	105.705	70.3147	83.9217	95.1106	88.5321	57.0932	29.0917	43.286	55.3195	64.7261	60.0978	48.2274	72.9631	38.1313	109.425	36.0947	34.332	106.384	86.1261	105.112	50.8314	52.5416	40.4806	50.661	50.6849	84.4865	42.922	30.388	74.7577	99.191	27.6863	35.0198	83.6465	62.4371	32.7314	40.2157	33.1284	78.1403	32.7534	48.2675	46.2285	56.6112	91.4917	62.3083	93.0758	93.5863
ILWL67	190.263	220.747	132.617	240.743	174.613	196.138	209.291	226.821	141.894	136.101	185.406	132.493	162.704	153.161	121.487	96.1101	130.938	227.784	136.112	162.525	223.982	198.875	224.026	132.131	124.741	124.373	113.582	156.825	208.731	167.33	125.053	95.3891	233.8	140.903	160.822	70.1733	105.184	154.327	167.058	121.347	213.224	147.567	130.701	117.71	187.706	223.998	198.528	86.3897	223.924
ILWL91	350.209	110.601	217.084	115.463	35.7086	33.642	36.3304	96.3225	96.6978	92.4362	51.4466	62.5627	49.7166	55.657	91.2677	119.601	97.782	47.6448	81.2614	59.7597	44.3453	30.4859	43.5705	69.7463	87.2699	96.632	112.876	41.8491	29.8697	44.4277	83.0251	120.7	50.0942	62.0143	45.9839	145.087	100.98	53.0346	34.1752	90.1056	39.5741	68.5692	76.9671	93.2758	28.4099	46.5613	37.9796	151.912	42.6756
ILWL92	374.58	116.541	238.772	116.002	48.6515	32.1516	23.5826	98.8181	122.843	114.217	65.153	86.9079	63.8959	73.0574	111.137	140.986	117.865	24.5322	99.1915	75.1607	23.4058	27.4001	20.5518	89.0925	106.553	116.871	133.748	63.1139	20.7442	60.7757	105.392	142.022	35.0414	84.3524	65.5716	169.243	121.57	72.1985	56.8388	112.096	36.3758	87.502	96.8179	114.149	41.5491	32.6343	43.2436	173.693	27.1176
ILWL123	314.33	126.761	189.95	137.384	27.5089	50.5084	62.6339	118.511	86.318	74.0967	66.9227	19.6531	27.5094	26.1579	55.5032	79.5789	72.0256	80.9886	53.5794	50.4625	76.0759	52.3693	77.0021	28.1755	50.6761	66.7429	81.7538	14.3402	62.5242	38.055	51.3762	80.4231	90.9748	35.1947	37.2865	107.071	58.1666	36.416	33.8014	58.6767	74.0188	46.3386	39.7633	57.0506	50.5402	81.7276	63.7318	114.766	79.1632
ILWL126	176.731	233.385	132.316	253.415	190.589	211.587	225.044	240.034	161.173	150.846	201.126	150.389	177.847	168.338	134.7	108.281	143.098	243.471	149.496	176.603	239.866	214.771	239.817	147.103	138.437	136.911	125.54	173.238	225.115	182.724	139.818	107.918	249.832	157.191	177.137	82.5442	119.134	169.926	183.863	135.421	229.097	161.739	145.248	131.18	204.28	239.406	213.97	94.6266	239.876
ILWL127	181.262	231.236	134.235	251.497	187.192	208.545	221.687	237.878	151.912	146.762	197.085	144.964	174.996	165.37	133.087	106.958	141.899	240.172	147.693	174.354	236.513	211.275	236.419	144.45	136.43	135.522	124.078	169.38	221.266	179.654	137.064	106.234	246.135	153.167	173.014	79.9779	117.021	166.488	179.331	133.086	225.505	159.441	142.753	129.335	199.987	236.341	210.631	94.5486	236.394
ILWL128	148.299	280.791	154.831	301.717	243.533	265.333	278.481	289.426	200.378	198.2	251.223	201.098	231.248	221.55	187.577	159.663	193.784	297.004	202.206	229.317	293.011	268.079	293.195	201.17	191.298	188.489	175.034	225.543	277.236	235.237	191.424	158.599	301.797	208.244	228.453	130.092	172.19	222.125	234.915	187.108	280.94	213.852	197.967	183.617	255.538	292.199	266.076	139.829	292.129
ILWL130	169.366	247	138.727	267.518	205.625	227.49	240.643	254.463	166.958	163.525	214.785	163.264	193.804	184.207	151.336	124.592	158.768	259.136	165.938	192.599	255.079	230.219	255.346	163.494	154.915	153.019	140.657	187.643	239.409	197.736	154.464	123.621	264.23	170.877	191.086	95.5225	135.56	184.757	197.413	150.498	243.488	177.277	161.071	147.353	218.044	254.61	228.87	108.878	254.442
ILWL131	228.685	182.845	138.73	201.506	126.539	148.609	161.402	186.028	100.643	96.2099	140.184	83.3537	115.56	106.192	79.5132	60.0633	92.8047	179.927	93.9724	118.345	175.788	150.964	176.032	86.3085	81.5209	85.162	78.6949	108.632	160.354	120.931	82.0447	59.1768	186.014	94.4371	114.055	49.2306	62.4093	108.363	119.077	80.239	165.949	103.11	85.3597	75.6732	140.037	176.695	151.824	68.0577	175.865
ILWL133	163.284	252.767	139.861	273.239	212.104	233.681	246.955	260.201	174.698	169.12	221.255	170.554	199.447	189.77	155.915	128.268	163.204	265.487	170.942	198.141	261.584	236.618	261.713	169.451	159.592	157.507	144.971	194.402	246.272	204.189	160.772	127.421	270.952	177.756	197.976	101.38	140.398	191.317	204.381	156.553	250.195	182.57	166.279	152.105	225.048	261.039	235.146	111.038	261.085
ILWL134	177.863	237.183	136.698	257.493	193.253	214.886	227.968	243.924	155.928	151.985	203.018	150.844	180.977	171.34	138.844	112.078	147.433	246.522	153.658	180.532	242.686	217.565	242.709	150.889	142.142	141.189	129.323	175.458	227.273	185.825	143.162	111.103	252.272	159.129	179.11	85.8216	122.717	172.781	185.369	139.345	231.668	165.218	148.435	135.043	206.055	242.613	216.793	98.2391	242.435
ILWL135	152.912	420.194	264.344	441.657	392.824	413.885	427.279	431.453	347.018	343.396	398.352	351.348	379.674	369.924	333.961	305.103	337.936	445.705	348.181	375.857	442.18	416.969	442.052	349.209	338.131	333.496	318.856	375.103	426.816	383.517	338.754	304.312	450.666	357.112	377.148	274.629	319.571	370.239	384.345	333.525	429.48	360.997	345.894	330.296	404.653	440.573	414.084	280.236	441.315
ILWL137	227.23	181.835	136.159	200.385	126.087	147.481	160.747	184.992	109.588	98.0889	140.994	85.2315	114.775	105.56	77.4723	58.4452	91.115	179.203	91.7816	116.761	175.403	150.346	175.497	83.6384	80.0751	83.2267	77.3605	108.642	160.696	119.998	80.3549	58.4409	186.309	94.7775	114.317	46.2682	60.3982	107.558	120.267	77.8602	166.078	102.46	84.6014	74.0843	140.763	176.213	151.714	67.0221	176.08
ILWL138	208.347	202.779	133.988	222.363	152.705	174.698	187.641	207.809	120.934	117.593	164.459	109.587	141.882	132.451	103.307	80.545	113.835	206.085	117.585	142.744	201.983	177.152	202.275	111.651	106.152	107.022	97.7914	134.63	186.4	146.009	104.815	79.679	211.701	119.21	139.117	56.8651	86.7291	133.192	144.806	102.015	191.345	127.801	110.857	99.3153	165.555	202.37	177.231	77.6994	201.825
ILWL139	233.416	174.289	137.319	192.511	117.192	138.653	151.942	176.847	103.244	90.6223	132.382	76.6584	105.814	96.5879	68.991	51.7792	83.2868	170.398	83.4048	108	166.518	141.56	166.658	74.9351	71.4904	75.2654	70.6172	99.6645	151.751	111.135	72.046	51.9533	177.292	86.0626	105.63	45.0687	52.0745	98.8496	111.3	69.8617	157.098	93.4679	75.6297	65.5634	131.912	167.172	142.717	64.6421	166.998
ILWL141	177.592	236.953	135.96	257.297	193.663	215.192	228.374	243.909	158.366	153.416	203.671	151.498	181.817	172.264	139.95	113.881	148.335	246.84	154.421	180.997	243.032	217.948	243.109	151.08	143.409	142.162	130.512	175.831	227.701	186.032	143.173	113.121	252.635	159.498	179.478	85.3832	123.922	172.962	185.913	139.199	231.951	166.132	149.593	136.139	206.476	242.848	217.277	100.608	242.858
ILWL142	348.952	121.236	218.628	126.25	19.1102	25.981	31.9202	107.376	102.751	95.5522	61.691	54.3912	38.9389	46.4785	86.2172	113.666	96.8036	47.6305	78.6989	60.8681	41.1516	24.1372	43.5368	61.774	81.2469	94.423	111.006	32.6105	29.6532	42.5052	79.9444	114.485	58.9481	59.125	46.5602	141.942	93.5278	51.9518	35.8277	87.6086	48.1476	66.1043	70.026	88.494	34.7118	52.5615	46.4408	148.036	46.7728
ILWL155	131.324	348.445	202.387	369.817	317.491	339.022	352.309	358.852	272.018	269.628	323.665	275.383	305.094	295.41	260.271	231.964	264.912	370.758	274.413	301.762	366.931	341.906	367.031	274.456	264.34	260.197	245.85	299.504	351.135	308.374	263.834	231.02	375.326	281.558	301.694	200.388	245.434	295.137	308.716	259.016	354.231	286.81	271.511	256.411	329.053	365.561	339.257	208.723	365.889
ILWL156	150.714	276.155	152.297	297.174	238.768	260.233	273.33	284.694	195.138	193.313	246.125	196.002	226.411	216.641	182.988	155.335	189.461	291.803	197.449	224.43	288.102	262.896	288.022	196.109	186.646	183.983	170.742	220.706	272.449	230.451	186.806	154.403	296.849	203.487	223.45	125.443	167.612	217.117	229.899	182.429	276.041	209.334	193.406	179.093	250.536	287.321	261.066	136.234	287.409
ILWL158	241.007	167.647	140.733	185.463	107.785	129.278	142.467	169.295	95.5618	82.9302	123.483	67.0298	96.0602	86.7477	60.3204	45.294	76.1664	160.991	74.968	99.2256	157.13	132.091	157.173	65.874	62.3089	67.721	64.7051	90.2645	142.358	102.224	64.5429	45.485	167.988	77.2896	96.6412	47.353	43.1756	90.0801	101.901	63.071	147.971	84.4008	66.0056	57.0184	122.674	157.998	133.451	63.5273	157.639
ILWL159	190.789	220.996	133.142	241.03	174.83	196.412	209.542	227.115	141.797	136.625	185.654	132.498	163.194	153.674	122.332	97.2672	131.728	228.009	136.806	163.025	224.177	199.098	224.261	132.505	125.582	125.196	114.47	156.978	208.87	167.56	125.291	96.5391	233.956	141.055	160.968	70.4988	106.018	154.556	167.205	121.664	213.394	148.192	131.375	118.521	187.823	224.247	198.831	87.8424	224.129
ILWL162	140.473	291.918	160.446	312.914	256.025	277.252	290.479	300.723	213.466	209.443	263.224	214.112	242.888	233.111	198.324	169.899	204.482	309.005	213.005	240.603	305.427	280.136	305.232	212.774	202.1	199.116	185.509	238.25	290.03	247.533	203.671	169.023	314.372	220.955	240.938	141.629	183.205	234.281	247.644	199.006	293.483	225.358	209.41	194.617	268.223	304.486	278.09	148.873	304.797
ILWL184	216.996	189.38	132.177	208.227	136.806	158.017	171.371	193.156	117.046	104.659	150.358	96.6151	124.454	115.025	84.4088	61.9131	96.7839	189.862	99.537	125.561	186.132	161.062	186.134	93.9216	87.4087	89.252	81.7172	119.474	171.502	130.209	89.5444	61.8522	196.74	105.031	124.761	48.0086	67.7371	117.745	130.754	86.3764	176.388	110.569	92.951	80.957	151.375	186.458	161.533	64.5569	186.518
ILWL185	337.796	120.281	208.895	126.475	10.039	25.3262	36.1976	107.028	100.119	85.794	59.4281	47.9863	21.5989	30.3116	71.1962	99.2019	83.7504	54.3539	64.7746	49.7369	49.2207	27.2855	49.9939	49.199	65.8164	80.653	98.0211	24.5292	38.4702	35.7965	70.5557	100.211	66.929	51.6261	41.6748	132.115	79.3133	44.2968	32.8153	77.8004	53.6206	52.4968	54.9241	74.1457	37.7186	57.6466	45.6058	134.311	53.9529
ILWL204	378.547	121.475	243.532	120.448	47.1266	29.5983	19.4133	103.006	129.026	119.971	71.9616	88.4368	64.4618	73.8635	114.083	143.589	121.299	17.9902	103.546	79.4966	12.1596	25.4011	15.045	91.2018	109.403	120.45	137.951	63.9935	21.412	63.8664	108.164	144.759	35.822	87.9043	70.5842	172.606	124.152	76.4236	60.826	115.129	39.2628	90.4905	99.113	117.037	47.0879	33.4739	48.1005	177.361	26.5328
ILWL232	258.512	156.634	151.301	173.456	89.644	111.921	124.693	156.545	82.2161	73.4422	107.842	47.0332	79.4786	70.5182	51.6085	46.2465	69.5035	143.222	64.6089	85.6211	138.914	114.263	139.286	51.2594	51.9312	61.0435	62.2518	71.9085	123.776	85.8486	52.9832	46.1042	150.022	60.9321	79.752	57.9774	35.8754	74.3796	83.7914	54.0822	130.465	71.0021	52.4016	48.5443	104.718	140.676	116.772	72.4274	139.49
ILWL234	155.709	257.02	138.989	277.728	219.076	240.595	253.779	264.92	176.77	172.644	226.119	177.046	206.012	196.209	161.462	133.322	167.907	272.322	176.33	203.75	268.511	243.425	268.445	176.273	165.24	162.431	149.128	201.051	252.725	210.441	166.767	132.337	277.019	183.651	203.786	106.132	146.375	197.335	210.198	162.42	256.2	188.058	172.197	157.567	230.918	267.317	240.857	113.802	267.38
ILWL251	150.065	426.975	269.077	448.442	401.054	421.973	435.253	438.173	351.33	348.318	404.831	359.484	386.788	376.872	339.964	310.333	343.57	453.785	354.442	382.618	450.418	425.012	449.972	357.273	344.066	339.228	324.111	383.278	434.813	391.417	346.72	309.396	458.315	364.89	384.816	282.442	325.998	378.05	391.855	341.437	437.187	367.241	352.272	336.366	412.314	448.345	421.132	283.933	449.043
ILWL260	128.849	365.008	215.273	386.349	334.934	356.021	369.309	375.341	288.603	285.127	340.449	293.265	321.305	311.476	275.495	246.34	280.103	387.831	290.033	317.967	384.339	359.015	384.067	291.378	279.494	275.371	260.828	317.199	368.885	325.837	281.384	245.44	392.832	299.309	319.302	217.756	260.992	312.544	326.274	276.339	371.778	302.712	287.302	271.852	346.747	382.861	356.101	221.886	383.402
ILWL261	136.045	296.417	162.163	317.317	261.411	282.465	295.795	305.242	220.253	214.343	268.522	220.242	247.812	238.05	202.543	173.829	208.442	314.321	217.341	245.23	310.797	285.525	310.558	217.853	206.443	203.184	189.477	243.821	295.566	252.732	208.781	173.031	319.795	226.502	246.508	146.706	187.711	239.616	253.364	203.96	298.873	229.896	214.04	198.95	273.88	309.666	283.234	151.906	310.138
ILWL263	231.706	171.964	134.109	190.315	117.199	138.706	152.104	174.775	102.513	88.8133	131.086	77.0545	105.961	96.7601	67.9139	50.956	81.0098	170.483	82.0214	106.697	166.506	141.706	166.722	74.7203	70.977	73.3404	68.2581	99.3321	151.345	110.092	70.0028	51.2366	176.57	84.8782	104.716	41.8595	51.779	97.8687	110.674	67.6879	156.223	92.1863	75.0822	64.2866	131.192	166.463	141.806	62.5992	166.389
ILWL265	191.251	216.625	130.627	236.332	169.857	191.096	204.301	222.125	138.531	129.989	180.52	128.78	156.539	146.869	113.755	86.8662	123.726	222.905	129.199	156.543	219.262	194.023	219.073	126.859	116.962	116.921	106.024	152.432	204.279	162.629	120.645	86.1242	229.257	136.672	156.526	67.0576	97.5401	149.777	162.714	116.818	208.745	140.914	123.652	110.205	183.462	219.162	193.361	76.3747	219.185
ILWL269	257.867	579.966	408.499	601.067	576.515	596.391	609.847	594.373	517.309	511.483	569.729	536.686	560.848	550.907	509.343	480.626	507.239	627.821	521.852	549.432	624.81	599.829	623.787	531.68	514.708	504.982	488.101	557.681	607.231	561.771	516.391	479.914	627.2	535.902	555.204	451.247	498.894	548.324	562.964	510.003	605.674	534.884	523.922	505.602	582.538	617.249	588.679	448.01	619.225
ILWL270	134.385	323.028	183.297	344.253	289.352	310.804	324.041	332.749	245.363	242.668	296.362	247.204	276.82	267.119	232.463	204.193	237.934	342.524	246.832	274.206	338.782	313.654	338.796	246.341	236.344	232.884	218.927	271.487	323.218	280.712	236.516	203.265	347.595	253.947	274.021	173.662	217.346	267.446	280.868	231.792	326.601	259.169	243.486	228.658	301.323	337.79	311.561	182.235	338.067
ILWL271	313.739	126.302	189.229	136.731	26.1912	49.0967	61.7898	117.726	89.2858	73.6096	66.9396	23.0618	23.3115	22.0348	52.4342	77.3886	69.6247	80.3344	50.5625	47.9345	75.5815	51.6205	76.3556	25.0927	47.4876	64.2039	79.8541	14.389	62.6124	36.7829	50.5014	78.3859	91.0089	35.5162	37.6937	106.883	55.8249	35.7867	35.1173	57.6974	74.0213	43.5563	36.4814	54.4614	51.2803	81.1374	63.0074	113.002	78.9184
ILWL274	304.748	126.613	181.377	138.719	37.0106	59.6357	72.0338	119.87	79.914	67.9955	68.2392	12.4982	33.921	29.3214	49.6451	72.1528	65.8577	90.1892	49.6312	50.4809	85.3827	61.6452	86.2014	24.7699	45.8014	60.3934	74.4967	19.5029	70.7583	40.8103	44.0634	73.0869	97.8965	30.697	38.2811	97.7032	51.4622	36.151	36.4138	51.3573	79.9798	43.5159	35.2383	50.3372	55.7064	88.9013	68.6279	106.635	86.8087
ILWL276	393.625	127.95	257.476	124.098	62.377	40.8923	28.157	107.83	146.199	135.014	84.6286	105.283	78.1839	87.9746	128.385	158.288	135.239	11.1316	117.372	92.4169	14.1938	37.7045	13.8687	105.728	123.685	134.622	152.568	80.3879	35.9027	78.5296	123.568	159.669	37.4978	104.187	86.2936	188.303	139.018	91.4489	77.4435	130.141	48.4081	104.826	113.954	131.745	62.2695	37.07	59.1722	192.251	32.848
ILWL280	329.641	125.43	203.28	134.087	23.1324	42.7801	51.9604	115.059	86.3107	81.8432	63.0227	32.622	32.7167	35.4907	70.7011	95.3925	84.1571	69.2318	66.3457	56.3071	63.731	42.4235	65.0493	46.3284	65.5409	80.2721	95.3793	20.5669	49.9041	40.2811	65.1098	95.9022	78.4516	44.848	39.2301	122.784	75.1057	43.2195	30.2602	72.8819	63.8516	55.7964	54.3323	72.2715	41.9189	71.4752	56.7507	129.764	66.9788
ILWL284	306.965	129.976	184.834	141.727	37.299	59.0413	70.7245	122.652	77.4437	67.8096	68.9018	13.1836	30.7075	25.6847	49.4198	71.3606	67.6804	89.2188	50.1548	51.9682	84.8837	60.5277	85.0162	27.2823	44.0727	61.4967	75.5094	22.9559	70.9059	44.0374	49.5212	71.958	98.4022	34.9404	40.4582	101.041	50.724	39.3645	37.615	56.4454	81.2218	44.2761	33.8831	50.6994	56.6079	89.6921	69.1389	106.584	87.1595
ILWL292	903.771	1226.97	1054.45	1248.17	1219.34	1239.76	1253.11	1241.8	1160.11	1157.77	1216.23	1178.36	1203.81	1193.84	1154.03	1124.28	1153.81	1271.48	1167.4	1195.56	1268.39	1243.03	1267.53	1174.81	1158.71	1150.99	1134.36	1201.15	1251.68	1206.92	1161.54	1123.31	1273.17	1180.6	1200.17	1096.07	1142.01	1193.4	1207.8	1155.49	1251.68	1180.58	1167.82	1150.48	1227.72	1263.19	1234.85	1093.19	1264.67
ILWL294	50.1639	289.889	121.882	311.289	293.479	312.679	326.169	304.037	235.12	224.092	280.464	255.532	279.56	270.029	226.539	201.946	220.356	343.273	236.168	261.917	340.144	316.135	339.185	249.004	233.467	219.269	201.842	273.265	320.64	274.294	228.763	201.785	338.532	248.931	267.653	164.513	219.158	260.972	276.114	222.051	316.836	249.145	241.935	222.199	294.612	329.036	300.421	167.394	331.575
ILWL299	289.954	137.888	172.458	151.799	56.12	77.831	89.7814	133.428	72.2081	63.954	80.2579	15.5095	46.5765	38.6808	43.3013	58.0511	63.6713	108.296	49.7695	60.9373	104.152	79.543	104.152	29.2279	39.0219	55.9528	66.4119	39.698	89.6149	57.4843	45.6508	58.3733	116.35	38.8673	51.7052	85.3735	38.4714	48.5372	51.8889	50.8609	98.1223	48.8615	32.4622	43.0052	72.604	107.469	84.9391	92.3298	105.512
ILWL321	415.762	737.643	565.344	759.023	732.92	753.313	766.881	752.679	674.739	670.766	728.138	692.113	718.449	708.551	668.07	639.431	666.6	784.952	680.544	707.954	781.725	756.652	781.053	688.107	673.362	664.15	647.449	714.024	764.255	718.854	673.019	638.692	785	692.599	712.171	607.274	656.654	705.344	720.161	666.832	763.322	693.768	682.13	664.245	739.729	775.14	747.019	607.949	776.945
ILWL323	196.272	214.956	133.62	234.807	167.136	188.932	201.808	220.442	129.939	127.251	177.328	124.152	154.81	145.108	113.861	87.9325	123.806	220.401	128.976	155.41	216.486	191.412	216.481	125.606	116.711	117.098	106.307	149.239	200.924	160.269	118.707	86.7641	226.011	133.373	153.239	66.5896	97.4131	147.299	158.886	115.502	205.642	139.654	122.497	109.969	179.825	216.642	190.782	79.1936	216.125
ILWL334	140.819	392.191	239.989	413.77	363.285	384.672	397.865	403.132	314.12	313.27	368.39	320.823	350.324	340.488	305.017	276.056	309.269	416.363	319.323	346.902	412.712	387.481	412.597	320.171	309.004	304.7	289.955	345.292	396.932	354.156	309.548	275.051	420.885	327.195	347.222	245.56	290.374	340.755	354.104	304.607	399.808	331.754	316.503	301.203	374.568	411.25	384.515	251.529	411.61
ILWL336	341.504	122.572	212.737	129.019	19.9326	34.0621	41.1399	110.038	94.5047	89.4354	61.1727	46.4199	36.1366	42.0368	80.1968	106.509	91.4998	57.3	73.9799	58.9058	50.872	32.8206	53.063	56.8468	75.1273	88.7548	104.684	27.5988	37.5655	41.2373	74.312	107.097	66.3788	53.2802	43.1931	134.839	86.6097	48.6268	32.1451	82.1676	53.9143	61.3595	63.7005	82.1079	36.4269	60.1518	49.8859	140.674	54.4104
ILWL337	373.272	59.6846	224.741	46.6423	105.28	92.7488	91.3788	39.5979	147.414	125.286	68.5527	135.495	115.528	121.924	138.542	170.501	127.786	85.552	119.312	90.1913	86.513	93.3158	84.653	127.456	139.541	133.071	146.652	108.049	74.6311	87.122	123.502	172.579	50.608	110.979	92.9655	184.2	156.215	97.29	91.7953	126.858	51.9841	109.995	132.552	140.234	73.4685	51.6075	60.5185	191.85	60.9744
ILWL338	355.146	47.4333	206.983	39.6556	96.1033	87.479	88.8343	27.71	133.449	108.321	54.5044	122.907	104.559	110.056	122.375	153.902	109.995	87.0614	102.963	74.7107	86.4807	88.8736	85.2066	113.764	124.119	115.803	128.747	96.0193	70.1991	73.4823	106.801	155.932	53.0649	95.6228	79.1986	166.705	140.416	82.8897	79.3432	109.874	46.5852	93.883	117.44	123.711	63.3341	50.3695	50.5394	173.884	59.4113
ILWL339	240.411	170.98	142.359	188.644	109.656	131.522	144.506	172.381	94.4778	83.4571	125.616	68.7535	97.1316	87.7442	60.7162	42.8757	77.319	163.205	76.4234	101.512	159.146	134.229	159.249	68.6775	62.2152	68.6806	64.8859	92.489	144.293	104.826	67.8717	42.2013	170.291	79.6911	99.0786	50.193	42.5216	92.9354	104.05	66.7832	150.44	85.5594	66.2102	57.4433	124.938	160.436	135.703	60.4928	159.636
ILWL340	155.913	254.456	136.75	275.068	216.649	237.83	251.184	262.203	177.955	171.139	224.201	175.44	203.396	193.609	158.574	130.6	165.032	269.662	173.481	200.93	266.009	240.87	265.876	173.345	162.523	159.55	146.607	198.818	250.626	207.939	164.169	129.927	274.78	181.681	201.79	103.65	143.711	194.949	208.368	159.62	253.938	185.487	169.673	154.816	229.005	264.778	238.478	111.485	265.145
ILWL388	173.906	154.543	38.4282	176.026	174.296	190.761	203.639	168.614	122.719	99.0147	149.077	144.059	163.489	155.593	112.699	102.91	96.6543	218.709	114.322	134.47	215.777	194.203	214.65	134.107	121.978	99.0118	82.3811	153.315	194.053	147.748	105.395	104.123	207.699	125.47	141.432	58.7985	114.291	135.313	150.899	98.0406	186.143	126.338	128.303	107.909	166.483	198.841	170.574	75.2881	202.546
ILWL395	168.4	245.757	137.096	266.179	204.29	225.713	238.964	253.021	167.879	161.977	213.575	162.613	191.73	182.094	148.545	121.381	156.332	257.48	163.326	190.461	253.718	228.603	253.718	161.367	152.148	150.37	138.096	186.562	238.423	196.367	153.169	120.594	263.177	169.96	190.013	94.103	132.843	183.338	196.53	148.943	242.424	175.244	158.824	144.795	217.133	253.229	227.381	105.388	253.353
ILWL396	265.673	153.18	156.44	169.711	84.6844	107.168	119.417	152.642	74.3916	71.6021	102.541	40.0616	76.2336	67.617	54.2664	53.1864	71.1144	137.731	65.2483	83.2494	133.216	108.969	133.739	50.4378	53.7887	63.3324	65.8095	66.5993	117.606	81.6183	52.2077	52.8285	143.737	56.5003	74.5288	64.4192	41.2352	70.3913	77.429	54.5268	124.504	69.3078	52.2688	51.1985	98.4508	135.167	111.57	79.793	133.474
ILWL397	130.429	363.169	213.882	384.51	333.301	354.226	367.606	373.661	289.448	284.916	339.329	291.864	320.15	310.415	274.74	246.186	279.396	386.019	288.951	316.594	382.604	357.287	382.363	289.527	278.846	274.626	260.358	315.583	367.318	324.111	279.613	245.466	391.265	297.798	317.734	215.909	260.187	310.789	324.914	274.454	370.151	301.872	286.551	271.115	345.232	381.139	354.716	222.488	381.896
ILWL398	140.354	280.786	153.794	301.488	245.976	267.073	279.95	288.56	195.029	193.555	250.361	204.433	230.635	220.322	184.464	153.858	189.55	298.519	200.791	228.62	294.894	269.884	294.466	204.284	187.991	184.785	170.79	228.279	279.429	237.687	194.592	152.696	302.556	211.108	231.06	135.19	170.776	224.847	236.222	190.146	282.132	211.148	195.788	180.624	257.52	293.239	265.733	130.32	293.163
ILWL399	267.795	149.487	156.005	165.381	78.0939	99.873	113.111	148.22	88.6968	72.779	100.445	39.4552	68.5595	60.2418	45.4538	48.1956	65.3316	131.567	56.5921	75.8817	127.445	102.715	127.836	37.8528	45.389	56.6133	61.7692	61.1382	113.236	75.0256	45.3486	49.0843	139.845	52.7858	70.6788	63.8181	31.618	64.2761	75.2623	47.162	120.379	63.151	44.5095	43.5752	95.3672	129.695	106.976	78.6198	129.006
ILWL400	133.592	377.951	226.298	399.186	348.708	369.781	383.228	388.578	305.554	300.265	354.917	307.743	335.472	325.803	289.745	261.016	294.114	401.669	304.049	331.842	398.076	372.958	398.002	305.049	293.925	289.519	275.105	331.121	382.781	339.474	294.877	260.241	406.797	313.287	333.369	231.298	275.303	326.356	340.635	289.719	385.643	316.901	301.657	286.134	360.893	396.541	370.21	236.675	397.251
ILWL401	521.079	844.025	671.575	865.295	838.931	859.271	872.772	858.881	779.852	776.259	834.256	798.209	823.84	813.873	773.378	744.256	772.09	890.93	786.236	813.917	887.765	862.619	886.988	794.236	778.502	769.625	752.926	820.267	870.537	825.284	779.609	743.447	891.305	799.088	818.661	714.112	761.986	811.854	826.465	773.473	869.741	799.327	787.452	769.659	846.173	881.453	853.115	712.615	883.163
ILWL406	196.492	489.715	327.641	511.321	466.93	487.852	501.28	501.884	417.91	414.715	470.522	425.427	453.426	443.594	406.733	377.666	409.589	519.67	420.722	448.46	516.248	490.973	515.984	423.035	411.104	405.567	390.42	449.012	500.594	456.838	411.727	376.882	523.903	430.4	450.38	346.969	392.902	443.482	457.717	406.293	502.61	433.668	419.138	403.056	477.954	513.876	486.969	351.132	514.817
ILWL407	136.431	374.062	224.46	395.607	344.348	365.693	378.925	384.862	297.014	295.618	349.995	301.938	331.78	322.006	286.909	258.398	291.391	397.359	301.047	328.391	393.719	368.514	393.651	301.2	290.928	286.719	272.245	326.339	378.02	335.255	290.691	257.487	402.038	308.377	328.384	226.836	272.142	321.845	335.333	285.755	380.951	313.536	298.267	283.079	355.73	392.348	365.866	234.736	392.777
ILWL408	322.073	34.3176	174.112	44.3194	90.9044	89.2069	95.1744	28.9571	110.564	79.9876	38.1067	105.861	94.6857	97.2579	98.6004	128.471	82.4187	99.7107	78.2874	54.0917	98.7048	91.4766	96.7839	94.3988	102.294	88.9177	99.7154	83.4426	77.6715	59.1777	80.5208	130.698	72.5054	73.8205	61.6099	135.686	116.888	63.1145	66.0398	82.035	56.4223	72.9312	97.3349	99.0753	58.0372	66.2886	49.4327	144.858	74.4493
ILWL410	204.693	206.081	132.804	225.662	156.744	178.422	191.614	211.356	129.723	122.77	169.27	114.801	145.837	136.528	106.636	83.798	117.122	210.022	120.781	146.284	206.064	181.156	206.329	114.668	109.771	110.275	101.046	138.962	190.888	149.839	108.197	83.2811	216.243	123.656	143.56	58.1898	90.056	137.067	149.783	104.95	195.755	131.837	114.868	102.859	170.27	206.434	181.58	80.0095	206.269
ILWL411	185.218	228.181	134.491	248.337	183.115	204.876	218.01	234.668	148.603	144.05	193.671	140.78	171.528	162.017	130.297	104.713	139.144	236.493	144.823	171.171	232.527	207.572	232.73	140.97	133.635	132.85	121.618	165.248	217.093	175.738	133.169	103.859	242.193	149.102	169.152	77.1111	114.066	162.797	175.427	129.504	221.584	156.148	139.46	126.421	196.03	232.52	207.073	93.3498	232.325
ILWL412	336.541	33.8853	188.299	36.6186	93.7805	90.1851	94.0674	20.4622	116.783	92.2873	43.0838	113.033	100.814	104.495	111.095	141.349	95.7129	95.9436	91.691	65.2239	94.2707	91.7528	93.3599	104.954	114.016	102.423	113.802	88.8144	73.7766	65.6496	92.2379	143.352	62.7964	82.9419	69.0331	149.636	129.154	72.5174	70.5345	94.8862	50.0631	83.1285	107.676	111.515	58.6733	59.5581	49.2551	158.914	67.1356
ILWL414	126.025	317.218	175.461	338.562	286.367	307.472	320.801	327.112	241.03	237.47	291.73	244.398	273.402	263.538	228.038	199.718	232.584	339.191	242.346	269.632	335.655	310.417	335.462	242.936	232.203	227.84	213.747	268.25	320.001	276.942	232.385	199.008	343.662	250.308	270.34	168.944	213.647	263.609	277.142	227.405	322.611	254.653	239.601	224.191	297.665	333.866	307.255	176.801	334.464
ILWL415	256.112	157.423	149.247	174.304	91.6044	114.095	127.079	157.653	86.2724	75.4368	110.116	50.2478	81.721	72.906	52.5414	46.2799	69.7126	145.572	65.7395	87.1105	141.046	116.679	141.688	52.7863	53.4579	61.5028	62.1965	73.9016	125.886	87.3392	53.0429	46.2285	152.154	62.4903	81.8255	55.6723	36.6762	76.0713	86.2257	53.7942	132.422	72.3443	54.0672	49.2883	106.991	142.546	118.88	71.3607	141.461
ILWL418	1364.82	1688.14	1515.76	1709.07	1679.89	1700.49	1713.75	1702.71	1619.93	1618.08	1677.17	1639.25	1663.79	1653.82	1614.07	1583.83	1613.92	1732.23	1627.92	1656.34	1728.94	1703.79	1728.2	1635.91	1618.56	1611.2	1594.56	1662.04	1712.44	1668.05	1622.9	1582.71	1734.05	1641.8	1661.49	1558.01	1602.1	1654.82	1668.87	1617.01	1712.73	1640.67	1627.71	1610.6	1688.9	1724.12	1695.68	1552.55	1725.28
ILWL419	345.592	48.6366	197.96	45.1853	93.6276	85.4612	88.7075	32.9443	134.256	102.707	54.1746	119.173	99.5726	104.636	113.723	145.225	101.594	88.9284	93.7222	67.0017	89.2215	87.8767	86.99	105.867	115.942	106.981	119.983	92.7	73.5698	69.0168	99.6812	147.556	62.1965	90.859	75.5092	158.101	131.945	77.1465	78.0758	101.897	52.4887	87.3939	110.401	115.441	64.3986	55.5323	51.1156	164.781	65.753
ILWL439	391.154	130.42	256.198	127.885	59.4918	44.8397	33.8033	111.577	136.356	131.83	83.0652	98.9772	77.4694	86.7478	127.402	156.164	134.511	27.2805	117.34	93.5774	21.139	40.1743	26.3584	104.745	122.465	133.844	150.871	76.2015	31.8788	77.1247	120.891	157.005	39.8037	99.8633	82.8715	185.035	136.793	89.6488	72.6062	128.19	48.5991	103.58	111.823	130.125	58.3859	42.4742	60.4737	189.811	33.0408
ILWL441	357.585	120.687	225.692	123.61	23.2409	19.1027	22.56	105.198	114.215	103.405	64.8325	65.535	43.5409	52.6988	93.0471	121.56	102.777	37.1515	84.5123	64.3313	29.5728	17.6285	33.2617	68.9577	88.1798	100.916	118.152	41.0813	22.2661	46.4689	87.4338	122.559	51.5509	67.3773	53.3464	150.822	101.443	58.1311	43.5429	94.7806	43.4621	71.6109	77.2308	95.7317	37.2695	44.1946	44.7704	156.015	38.1447
ILWL442	251.842	83.4226	108.819	103.074	113.687	125.2	136.33	92.31	83.6376	41.1371	74.4784	100.596	104.985	100.135	68.511	83.049	39.7344	148.796	58.3458	65.2121	146.07	128.612	144.681	88.0918	77.4444	49.5213	46.0094	95.7173	123.789	82.0755	57.9481	85.1592	132.1	69.9891	78.3686	79.5096	84.1655	74.059	86.0959	53.4298	111.737	62.6219	79.3131	65.3469	97.1246	123.898	95.9656	82.45	128.29
ILWL450	348.184	119.361	217.389	123.594	14.5091	14.2492	24.8819	104.44	110.742	95.2637	61.6987	59.0759	31.0221	40.7701	81.5446	110.395	92.6446	42.6336	73.5192	54.9863	37.4024	16.8518	38.5249	58.359	76.5091	90.1899	107.982	33.7919	30.0441	39.8466	79.3041	111.61	58.2933	60.6053	47.8781	142.25	90.4085	50.8315	39.407	86.3544	47.4002	61.4363	66.0009	84.7264	37.4382	48.6462	42.8776	145.332	45.0223
ILWL457	373.384	125.788	240.182	125.887	38.4124	26.7533	20.6213	108.375	126.814	117.23	73.7898	81.1868	57.5564	67.3572	108.11	136.813	117.028	27.1932	98.9016	77.1816	16.6209	23.6108	23.9614	84.6662	103.116	115.648	132.923	57.0335	20.4903	59.7693	102.682	137.69	45.0254	82.4029	67.0509	166.755	116.85	72.5772	57.6561	110.094	44.2215	85.7528	92.2768	110.996	46.6081	40.3864	51.0265	171.086	31.7207
ILWL461	278.973	143.242	163.63	158.282	66.531	88.8682	101.844	140.773	84.3989	70.9723	91.6009	26.8795	59.2557	51.6847	46.0453	55.6675	65.5641	120.213	54.0734	68.9756	115.768	91.3809	116.461	30.4262	44.7013	57.5639	65.4689	49.3531	101.363	65.1109	41.8012	56.4273	128.418	43.9566	60.6575	72.925	36.2254	55.1993	64.1618	45.7032	109.298	57.5957	40.5231	44.6893	84.1289	118.667	96.8426	87.7508	117.483
EC-718422	363.118	122.502	230.477	123.815	31.3166	13.3382	16.5336	105.759	129.567	111.391	71.7902	76.5819	47.1569	57.3693	97.0886	126.528	107.214	29.4991	87.6517	66.914	25.372	16.3465	26.8891	72.6068	92.3781	105.191	123.317	50.8687	29.6016	52.1173	93.8562	128.011	53.0347	76.3786	61.9386	157.32	106.299	64.376	55.3579	100.396	47.5071	76.9081	82.6346	100.664	47.1572	42.7457	48.4332	161.356	40.3761
EC-718423	372.747	122.218	238.619	121.767	40.1543	19.6375	12.9704	104.106	133.576	118	73.5771	85.1532	56.6792	66.7926	106.882	136.625	115.451	18.6596	96.7626	73.9087	13.3953	19.14	16.3369	83.2437	102.244	114.118	132.219	59.2344	25.3853	58.9986	102.648	138.059	44.1363	84.2516	68.2614	166.98	116.798	71.969	60.4057	109.286	43.344	84.8794	92.3351	110.3	48.8729	36.0242	48.4687	171.073	32.4483
EC-718424	388.341	129.897	253.43	127.217	53.9089	37.7778	27.2451	110.867	141.24	131.104	83.5584	97.4205	72.1735	82.2764	122.871	152.095	130.68	21.1893	112.801	89.4405	10.4985	34.78	20.5783	99.6873	118.014	129.826	147.326	72.7194	28.749	72.9303	117.229	153.077	41.3874	97.3174	80.8862	182.001	132.303	86.4217	72.0219	124.426	48.0964	99.6802	107.467	125.945	58.0025	39.4759	58.9409	186.16	30.928
EC-718425	308.361	127.621	184.87	138.289	33.0173	56.0397	68.7718	119.443	89.9218	71.0838	70.038	28.1119	25.7529	22.9454	46.4389	70.775	64.0584	87.1175	46.8689	48.0157	81.6606	59.2263	83.0435	26.0702	41.7608	58.7103	74.137	22.1174	68.3253	39.9666	47.9469	71.591	96.2299	36.1309	42.1002	103.184	50.028	39.2052	40.7727	55.1613	78.953	39.2899	30.2148	48.368	57.1661	86.0103	67.1572	106.121	83.595
EC-718426	275.341	142.461	159.813	157.43	68.5666	89.859	103.415	140.006	91.7394	70.788	93.1695	35.8005	58.9061	51.1229	40.0291	49.8681	60.6321	121.753	49.5521	66.867	117.658	93.186	118.103	28.005	39.5736	52.2048	60.7439	52.4088	104.018	65.7844	40.3802	51.3616	130.472	46.5471	63.2659	70.55	30.2984	56.1529	67.7236	42.9945	111.143	54.9782	37.1795	39.1867	87.1561	119.738	97.7478	82.7089	119.377
EC-718427	309.668	127.83	185.964	139.123	31.6856	54.2392	66.9203	120.353	87.4756	73.1773	69.471	17.1732	29.9147	27.1135	52.3602	75.8638	69.7522	85.2961	51.2153	50.6198	80.7139	56.5143	81.4552	22.5537	47.957	63.9646	78.727	17.1019	67.3952	39.432	47.698	76.9048	95.5634	33.9229	38.5929	102.155	54.0169	36.0845	37.2338	54.7519	78.1269	46.0354	37.5875	53.836	54.4687	85.9045	67.3266	111.118	83.9657
EC-718428	117.891	432.254	261.521	453.627	429.658	449.822	463.478	446.858	373.418	365.954	422.438	389.932	415.834	406.171	364.453	337.426	361.489	481.196	375.727	402.547	477.843	453.263	477.239	384.724	370.446	359.423	342.487	410.174	459.424	413.501	367.589	336.881	479.374	387.545	406.94	302.047	354.204	400.099	415.383	361.241	457.586	389.079	378.961	360.398	434.429	469.523	441.497	305.017	471.586
EC-718429	159.812	259.603	142.936	280.179	219.919	241.136	254.47	267.448	184.14	177.513	229.134	178.585	207.442	197.868	164.068	136.941	171.405	272.925	178.576	205.75	269.278	244.118	269.242	176.641	167.812	165.599	153.102	202.298	254.154	211.799	168.361	136.284	278.843	185.615	205.6	108.149	148.523	198.723	212.408	163.873	258.004	190.931	174.68	160.408	232.841	268.722	242.983	119.709	269.074
EC-718430	131.15	351.578	204.953	372.892	320.333	341.392	354.727	361.824	276.709	272.655	326.812	278.696	307.369	297.657	262.34	233.87	267.346	373.167	276.587	304.185	369.677	344.388	369.497	276.742	266.358	262.446	248.291	302.612	354.358	311.373	266.997	233.09	378.497	284.953	304.908	203.543	247.56	298.06	312.029	261.971	357.424	289.418	273.911	258.689	332.366	368.447	342.105	210.742	369.065
EC-718432	338.337	122.193	209.566	129.272	13.6236	29.4523	39.319	110.282	98.4757	89.2724	62.0626	42.5153	32.4916	38.4601	77.064	103.916	89.6021	56.6125	70.3839	55.8274	51.5812	29.3241	52.791	49.3559	72.1813	86.1747	102.532	22.1866	39.939	37.4569	70.124	104.916	69.118	50.2679	40.2282	130.571	82.9248	43.8045	31.6317	77.5924	55.5493	60.126	61.2296	79.2737	36.9391	61.2134	50.5206	138.768	57.5167
EC-718433	254.275	159.561	148.381	176.525	93.9197	115.857	129.027	159.958	91.7866	78.4912	113.105	53.5264	83.7461	74.9749	53.8042	46.7123	71.5444	147.513	66.9402	88.9711	143.346	118.618	143.743	53.2419	54.9248	62.9552	63.5136	76.6105	128.716	89.632	54.8888	47.0615	155.037	65.4726	84.4817	54.3262	37.2094	78.1501	89.517	54.9974	135.269	75.0404	56.3757	50.9401	109.961	145.068	121.556	71.3961	144.383
EC-718434	369.401	130.698	238.517	132.123	32.7797	18.1036	14.2819	113.632	127.315	116.393	77.0428	75.7635	50.7979	60.284	103.469	131.415	114.652	26.9671	95.8996	75.8439	20.8209	15.3731	24.4965	78.3577	98.0304	112.394	130.311	53.1881	30.3161	59.5212	100.037	132.631	53.9842	81.0739	67.1615	162.715	111.3	71.0433	57.6741	107.172	51.358	83.5585	87.5919	106.661	50.6054	47.7549	54.532	167.209	42.2003
EC-718435	394.226	137.178	260.569	134.345	60.0004	38.87	25.793	117.473	148.177	137.699	90.9229	102.759	75.4709	85.216	127.813	156.628	137.014	12.765	118.534	95.4432	15.2179	35.5639	16.0107	104.035	122.464	135.584	153.788	79.5881	41.2067	81.206	124.7	157.986	48.617	105.56	88.996	188.345	137.081	93.516	79.6963	131.377	56.987	106.139	112.734	131.328	67.1614	46.8244	65.6327	191.935	42.2043
EC-718436	386.261	128.56	251.686	126.742	53.2003	36.0711	24.1767	109.816	134.599	127.473	79.5674	94.0573	70.6109	80.1442	121.325	150.359	129.304	18.5717	111.192	87.7128	13.376	31.3219	17.0587	98.0081	116.276	128.215	145.597	70.8209	27.9975	71.8025	115.861	151.37	39.7769	95.2166	78.0262	179.945	130.721	84.1429	68.2709	122.965	46.288	98.269	105.947	124.342	54.5121	39.5581	56.1085	184.482	31.7304
EC-718437	376.769	127.091	243.575	127.041	43.6949	29.0984	19.6688	109.587	126.164	119.088	74.348	83.7412	61.0584	70.4373	111.837	140.415	120.939	23.6894	102.38	80.295	17.7642	24.0138	20.468	88.2565	106.559	119.337	136.54	61.2056	24.4167	64.0864	107.005	141.341	44.1572	86.1055	69.6689	170.282	120.568	75.5997	59.5773	114.098	45.3021	89.6576	96.1971	114.782	48.0898	41.2557	52.0518	174.805	33.6865
EC-718438	366.525	125.012	234.464	126.871	33.0088	23.4495	19.8226	108.803	117.699	110.448	69.2015	72.4318	51.6829	60.7598	102.066	130.273	112	31.3272	93.2392	72.5899	24.7802	18.5908	27.5007	77.7267	96.8027	110.003	127.028	50.2097	22.5815	55.2976	96.7968	131.149	49.0182	75.861	60.5042	159.622	110.131	66.2669	50.345	104.097	45.0014	80.7524	86.149	104.844	41.6284	44.2507	48.7734	164.813	37.1456
EC-718439	83.0659	253.552	90.1094	274.767	256.735	275.691	289.237	267.231	202.407	188.085	243.704	220.079	243.047	233.681	189.976	166.591	183.144	306.16	199.242	224.596	302.964	279.309	302.12	212.552	197.215	182.269	165.058	236.577	283.539	237.086	191.696	166.705	301.184	212.168	230.85	128.258	183.406	223.911	239.261	184.732	279.445	211.971	205.552	185.539	257.662	291.417	263.131	132.497	294.14
EC-718440	185.582	234.102	139.185	254.464	189.476	211.418	224.382	241.063	152.754	151.476	199.988	146.249	179.061	169.666	139.436	114.977	147.985	242.735	153.297	178.775	238.658	213.86	239.022	148.156	142.67	141.85	130.715	171.39	223.004	182.236	139.879	114.06	248.141	155.238	175.153	83.8585	123.134	169.17	181.324	136.397	227.58	164.29	147.901	135.402	201.801	238.844	213.692	104.301	238.483
EC-718441	366.593	124.755	234.499	126.624	33.7015	22.2166	18.0123	108.48	117.921	110.344	68.872	72.8469	51.5139	60.5544	102.011	130.319	112.041	29.8326	93.044	72.2518	24.6441	16.9236	25.9815	77.6043	96.7048	109.957	127.085	50.7726	23.6396	55.5863	97.1597	131.278	48.8968	76.3299	60.6551	159.819	110.209	66.2483	50.5537	104.294	45.0199	80.8534	86.2849	104.888	41.8004	43.9673	48.2868	164.943	37.6249
EC-718442	344.714	121.786	214.818	126.841	11.7598	16.8193	29.0577	108.06	112.148	95.362	64.8355	55.1976	29.4747	38.8589	79.1797	107.625	91.8134	47.0475	71.5213	54.9677	42.5785	20.1315	43.4228	52.9938	74.1088	88.6045	106.203	30.9862	35.922	39.1868	76.2761	108.936	64.6067	58.3262	46.8319	138.067	86.7381	48.4939	40.1226	83.0475	52.6807	61.3838	63.9008	82.3948	40.3516	54.1287	47.6472	143.005	51.5896
EC-718448	280.357	144.248	165.443	159.235	66.3329	88.5123	101.233	141.677	82.6455	71.2897	91.55	24.9736	59.0394	51.463	47.4631	56.8969	67.428	119.643	55.263	69.804	115.357	90.7546	115.86	31.2108	45.5456	59.2446	67.0612	49.3345	101.034	65.717	43.9684	57.4951	128.231	44.5681	60.5885	74.5424	37.3696	55.5707	63.729	47.8715	109.288	58.702	41.4004	46.2403	83.7754	118.683	96.86	89.1341	117.363
EC-718449	426.9	240.907	315.061	238.526	199.312	208.25	208.808	231.974	242.962	238.089	220.321	216.033	210.478	215.087	229.518	243.311	230.839	211.241	227.758	219.679	199.81	209.129	209.898	222.346	228.107	232.857	240.267	204.422	194.991	206.246	220.67	241.824	204.797	212.245	212.371	260.947	232.428	215.745	209.08	227.027	203.857	215.518	218.957	229.117	205.981	204.037	211.329	261.582	195.691
ILWL14	212.413	148.26	97.5097	169.236	131.278	150.508	163.27	156.358	78.9964	69.1633	119.692	92.6777	121.219	112.233	76.2974	65.8615	71.7462	179.97	82.5493	104.066	176.571	152.976	175.823	91.0481	83.1328	69.4398	57.0512	109.636	156.38	112.085	68.1711	66.5713	175.206	85.0873	103.555	24.6599	72.0849	98.2435	110.661	63.1787	153.857	92.5535	87.489	70.8344	129.941	166.963	138.711	58.0962	168.404
ILWL15	249.589	114.616	120.897	134.199	95.8591	113.651	125.917	119.555	56.1452	37.1657	79.434	63.784	87.9612	80.3469	51.7364	59.9842	43.7915	141.76	50.8583	66.0985	138.308	115.965	137.538	61.7298	58.463	43.1103	40.1459	73.9082	117.124	73.3728	34.225	61.4105	134.663	47.6396	64.5467	50.0395	56.1906	60.0929	71.3065	31.318	113.374	57.0977	58.9938	46.6432	89.9826	126.75	98.4209	70.5686	128.274
ILWL29	196.108	213.045	131.379	232.8	165.699	187.046	200.313	218.641	137.004	129.043	177.35	124.235	153.757	144.226	112.827	88.0853	122.739	218.76	127.594	153.79	215.015	189.928	215.065	123.046	116.116	116.046	106.068	148.058	200.093	158.59	116.509	87.6707	225.095	132.602	152.51	63.5747	96.5867	145.734	158.666	112.777	204.554	138.921	122.009	109.119	179.326	215.093	189.859	80.9014	215.175
ILWL428	367.303	121.98	234.223	122.993	32.7239	16.8481	12.9159	104.827	123.987	111.877	69.233	76.4578	51.0345	60.7582	101.74	130.872	110.872	24.8354	92.3913	70.422	17.6392	14.2709	21.2439	77.8385	96.8653	109.304	127.039	51.5469	20.7471	54.0438	96.9231	132.079	45.4488	77.3982	61.8926	160.899	110.945	66.4632	52.6412	103.966	41.9602	79.7788	86.4151	104.813	42.7947	38.5307	46.0045	165.46	32.8752
ILWL429	304.741	125.876	180.602	138.182	38.7789	61.1532	73.3608	119.984	80.7261	69.601	68.4911	12.3005	38.9216	35.5131	53.3289	75.5691	68.6978	91.2248	51.5462	52.09	86.4225	62.8629	87.306	25.2668	50.0599	63.2004	76.3215	20.5794	70.8599	40.445	43.275	76.3871	98.3787	28.9304	36.3848	96.5709	54.1653	34.5289	36.3355	50.4707	80.1179	47.4367	40.1907	53.7402	54.8791	89.383	69.6457	108.91	87.4419
ILWL430	331.572	114.41	201.141	121.611	10.4793	28.2333	41.2413	102.66	101.133	82.8254	56.7429	44.9932	25.2755	32.2747	67.8303	96.8162	79.0724	58.6692	59.6701	44.0675	53.73	31.5742	54.768	42.0465	63.7926	76.1722	93.4202	17.5348	40.5884	27.028	62.0523	98.1813	68.6168	44.184	34.5747	124.781	76.1059	35.5389	28.9227	69.1224	52.772	49.3156	53.0165	70.4542	34.9206	57.9912	44.6345	131.071	56.2284
ILWL431	381.535	120.846	245.636	118.901	50.3436	33.7964	24.0169	102.146	132.498	122.855	73.5971	92.3909	68.3495	78.0072	117.371	147.143	123.858	19.8767	106.36	81.867	11.5351	30.2821	17.625	94.7688	112.899	123.344	140.685	67.1721	20.4905	65.7656	110.652	148.232	33.1827	90.3811	72.9355	175.615	127.653	78.9583	63.675	117.671	38.4215	93.1445	102.469	120.256	48.6329	31.3323	49.3906	180.467	22.9895
ILWL437	349.781	119.472	218.558	124.058	17.6269	23.6592	30.1073	105.537	106.127	96.6162	61.2964	56.4344	39.4706	47.7245	86.738	114.818	96.9522	45.7369	78.3845	59.8674	38.7394	22.4634	41.6755	61.6736	82.0022	94.7075	111.362	32.7219	26.2287	40.5686	79.6837	115.672	56.9513	59.0007	45.8006	142.471	94.3215	50.9964	36.2526	87.2977	45.8486	66.2053	70.7909	89.1122	33.1684	49.6502	44.9212	148.963	44.0145
EC-718692	133.472	373.119	222.907	394.669	344.083	365.251	378.52	383.945	296.835	294.873	349.406	301.821	331.287	321.46	286.132	257.565	290.452	396.928	300.303	327.657	393.402	368.127	393.235	300.734	290.205	285.828	271.37	326.067	377.793	334.846	290.221	256.744	401.605	308.076	328.049	226.212	271.553	321.398	334.971	285.159	380.502	312.826	297.686	282.324	355.411	391.842	365.273	233.73	392.421
[truncated: 355 more columns]
